# Supplementary material
Source: PubMed Central journal article supplement (PMC6848948)

Supplemental Fig 1: Lab1 GIAB SNVs

|                    |        |       |
|--------------------|--------|-------|
| TP Variant Calls   | 135945 | 99.9% |
| FP Variant Calls   | 201    | 0.15% |
| Unique Variants    | 27202  |       |
| Unique FP Variants | 135    |       |

1.A.1 INFO\_DP (Lab1 GIAB SNVs)

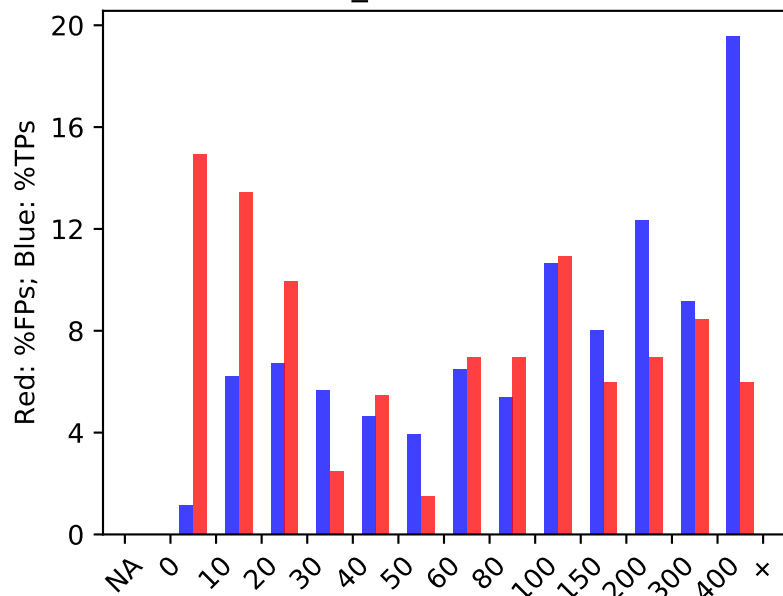

1.A.2 INFO\_DP (Lab1 GIAB SNVs)

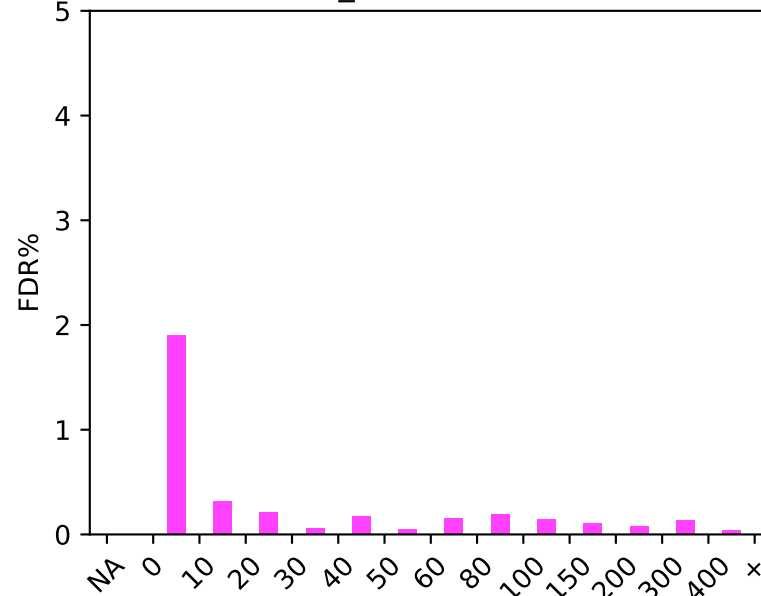

1.A.3 INFO\_DP (Lab1 GIAB SNVs)

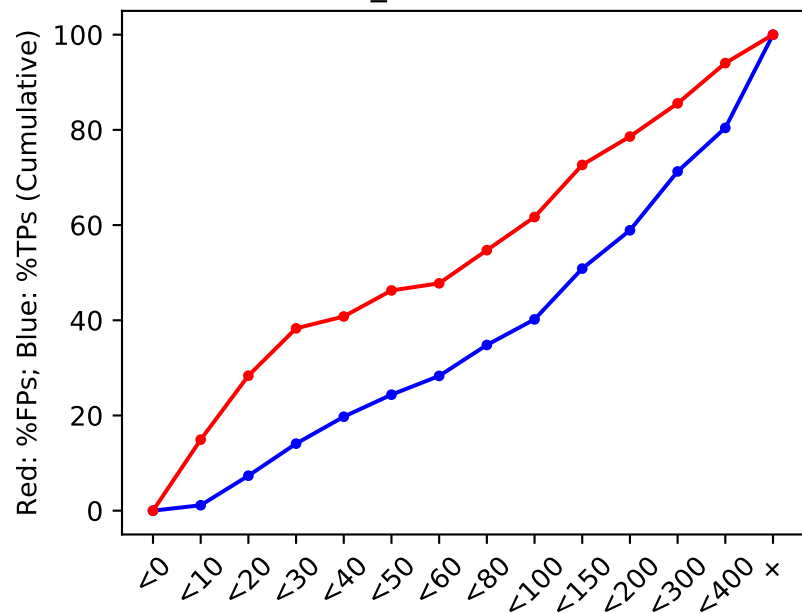

1.A.4 INFO\_DP (Lab1 GIAB SNVs)

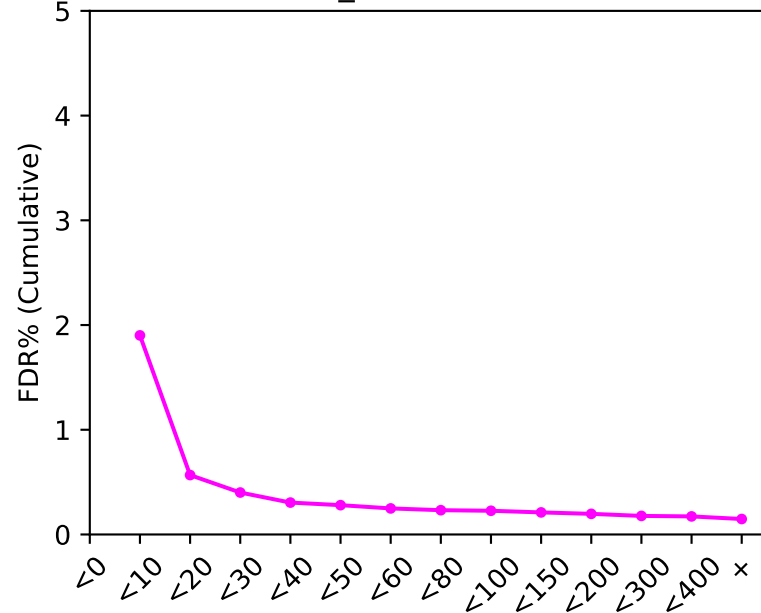

1.B.1 GT\_DP (Lab1 GIAB SNVs)

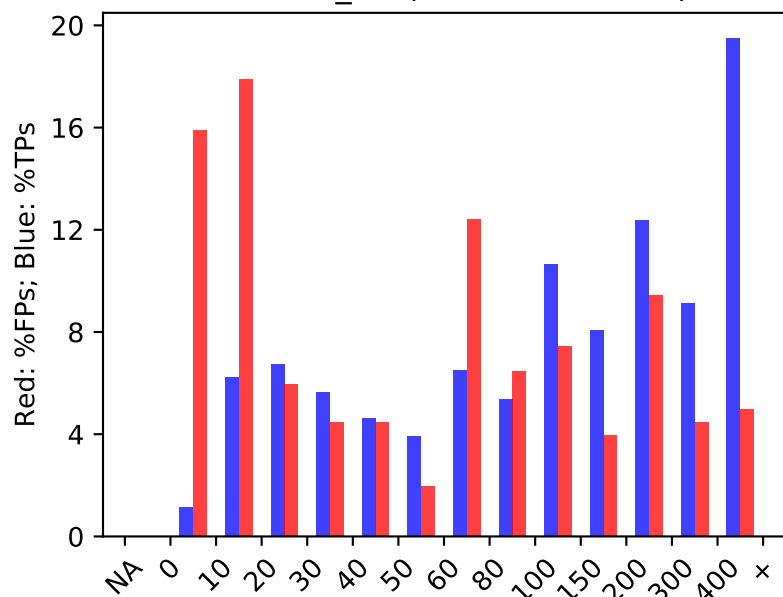

1.B.2 GT\_DP (Lab1 GIAB SNVs)

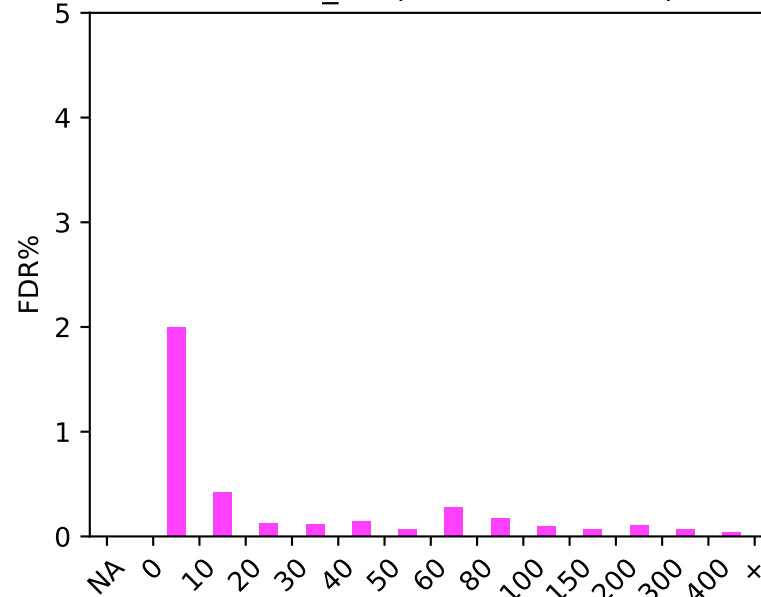

1.B.3 GT\_DP (Lab1 GIAB SNVs)

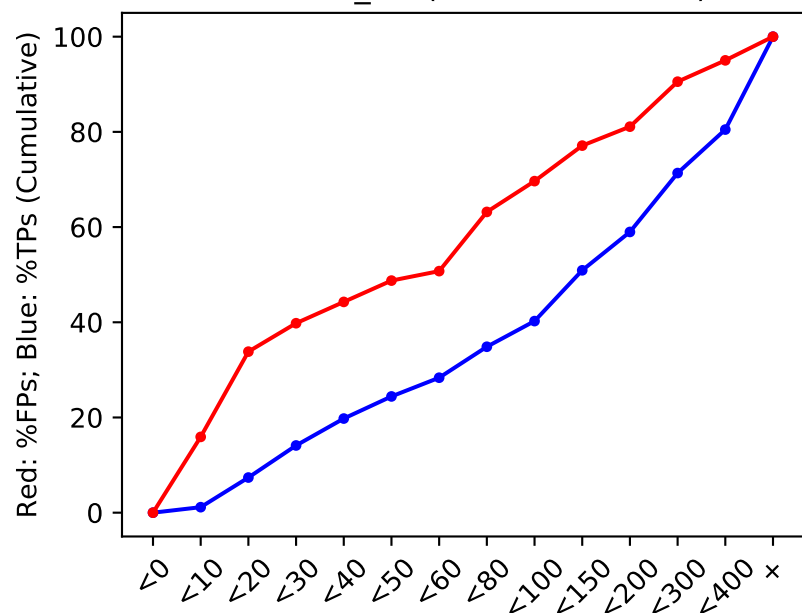

1.B.4 GT\_DP (Lab1 GIAB SNVs)

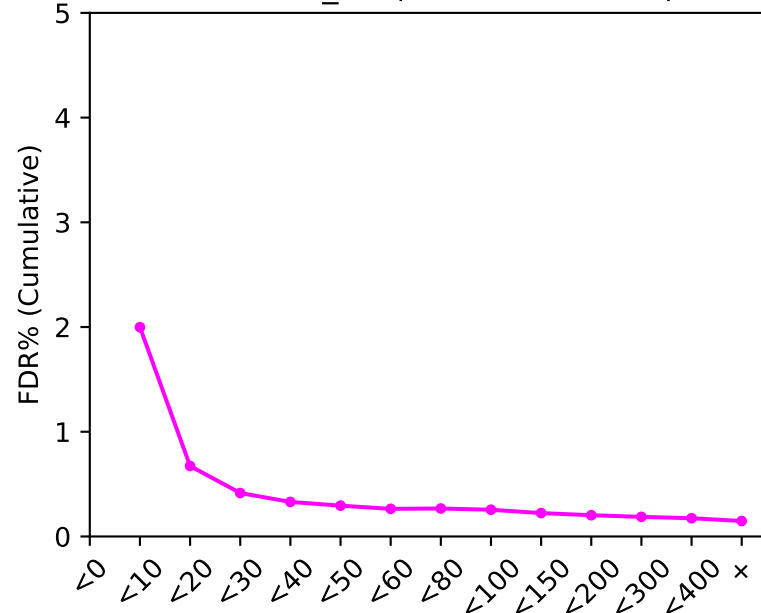

1.C.1 ABnorm (Lab1 GIAB SNVs)

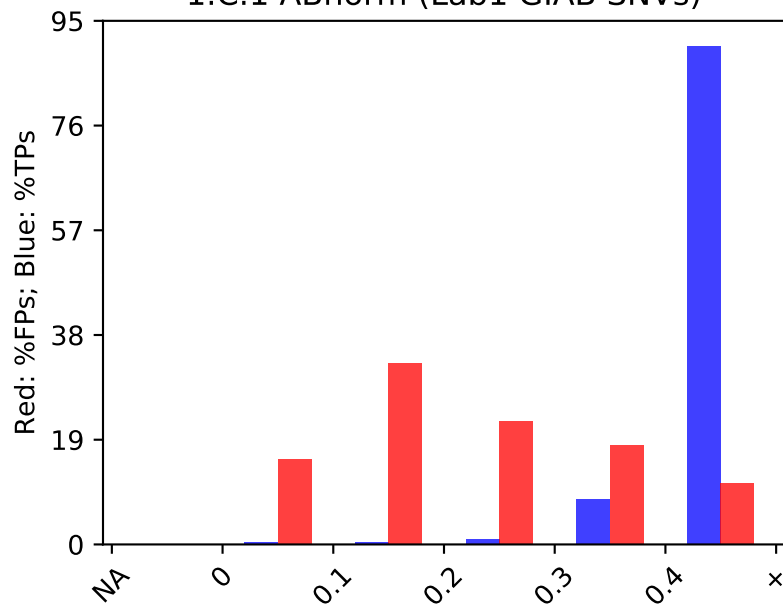

1.C.2 ABnorm (Lab1 GIAB SNVs)

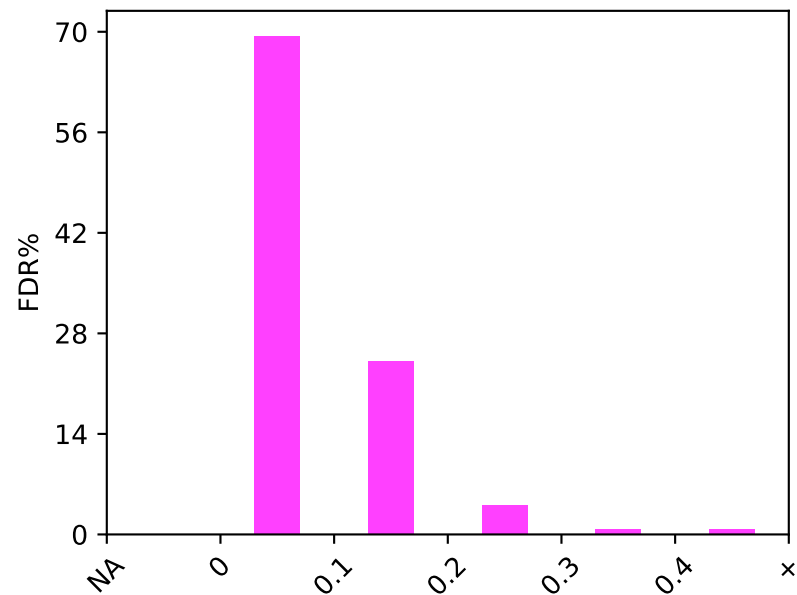

1.C.3 ABnorm (Lab1 GIAB SNVs)

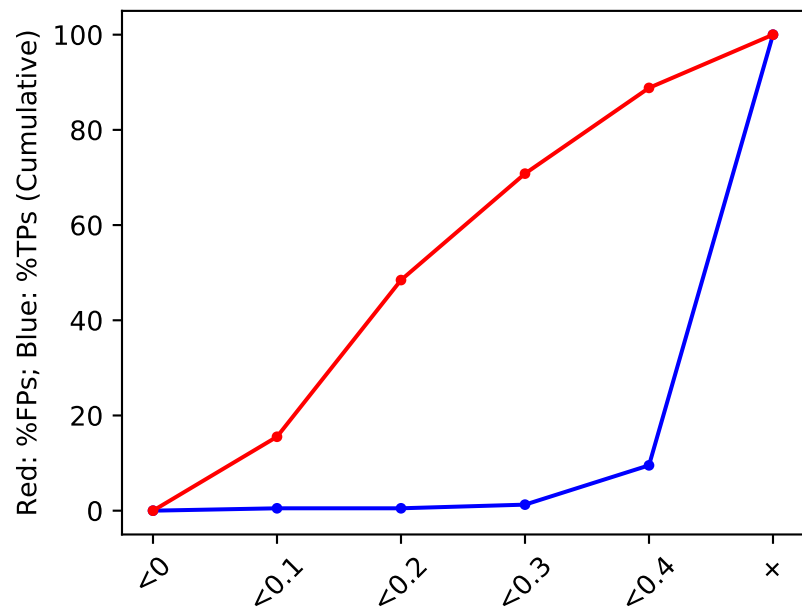

1.C.4 ABnorm (Lab1 GIAB SNVs)

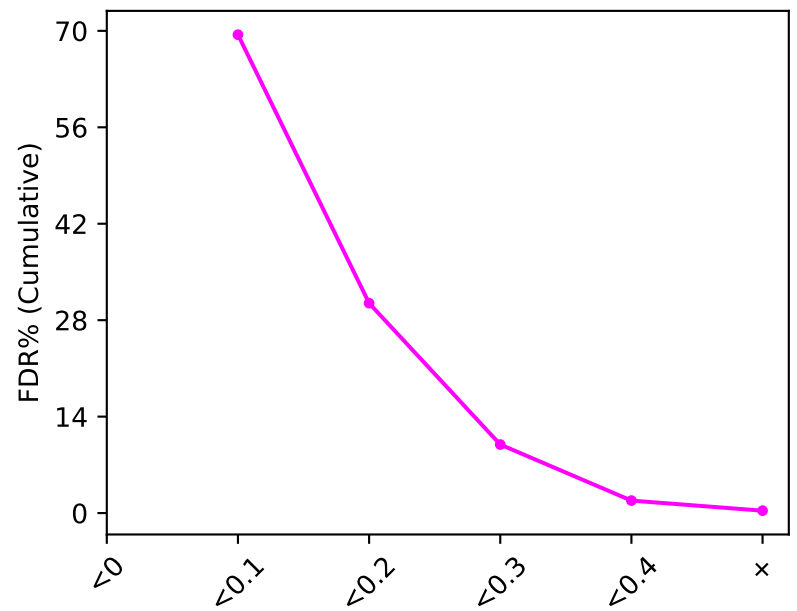

1.D.1 ABhom (Lab1 GIAB SNVs)

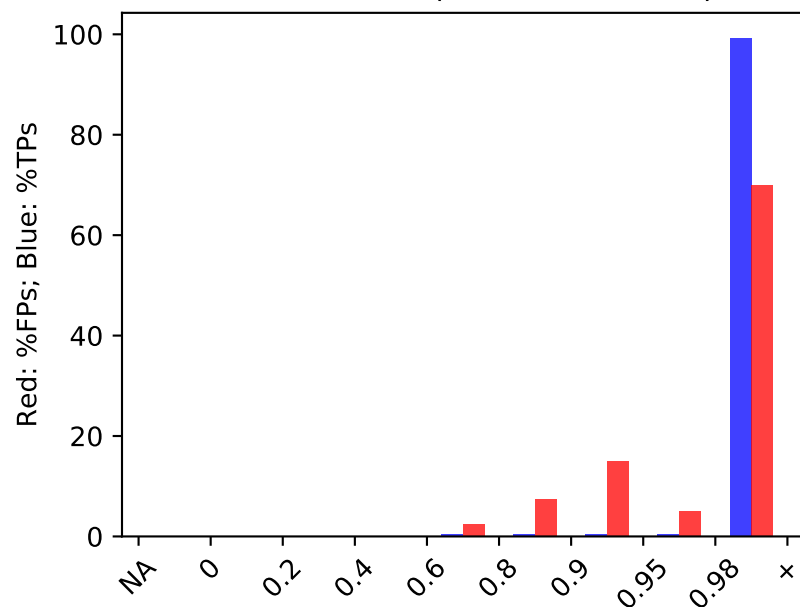

1.D.2 ABhom (Lab1 GIAB SNVs)

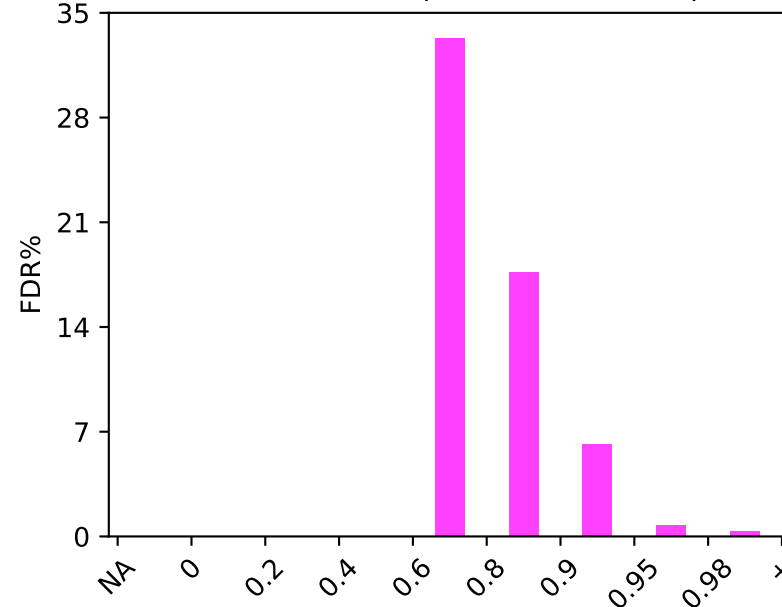

1.D.3 ABhom (Lab1 GIAB SNVs)

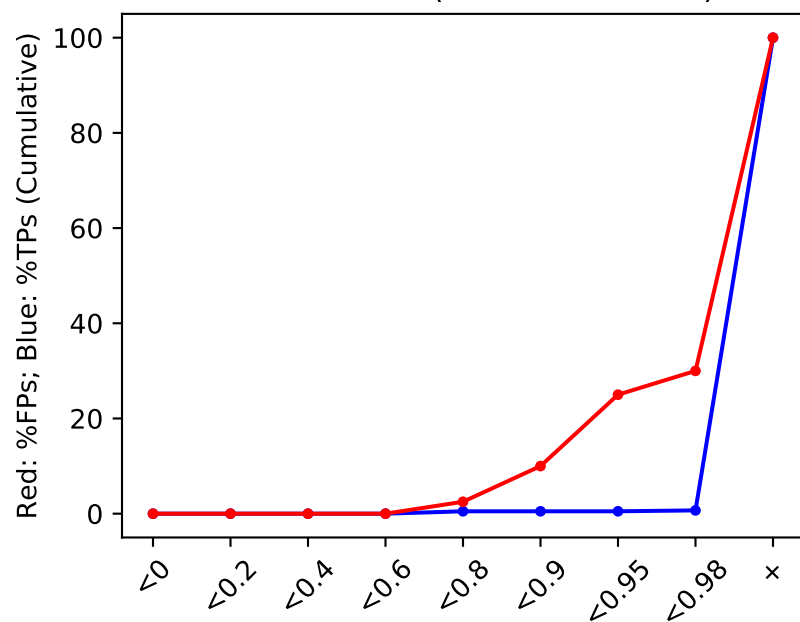

1.D.4 ABhom (Lab1 GIAB SNVs)

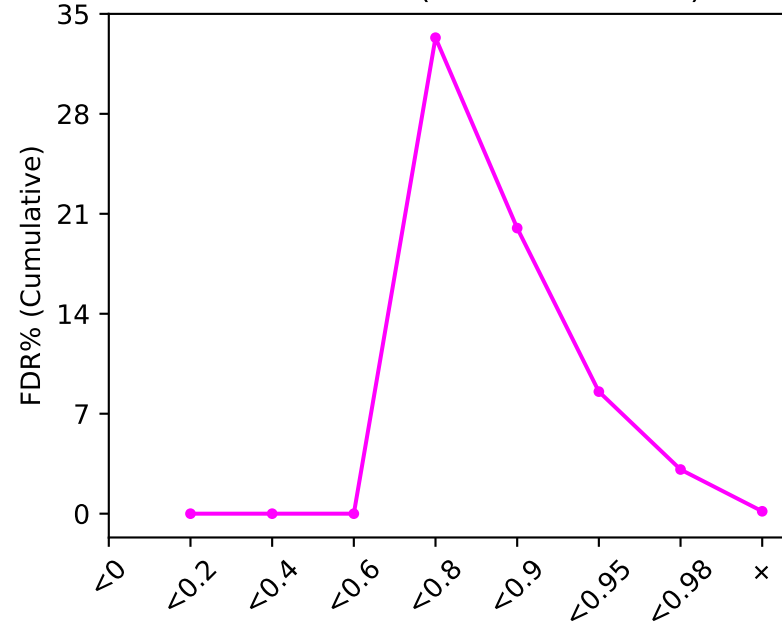

1.E.1 QUAL (Lab1 GIAB SNVs)

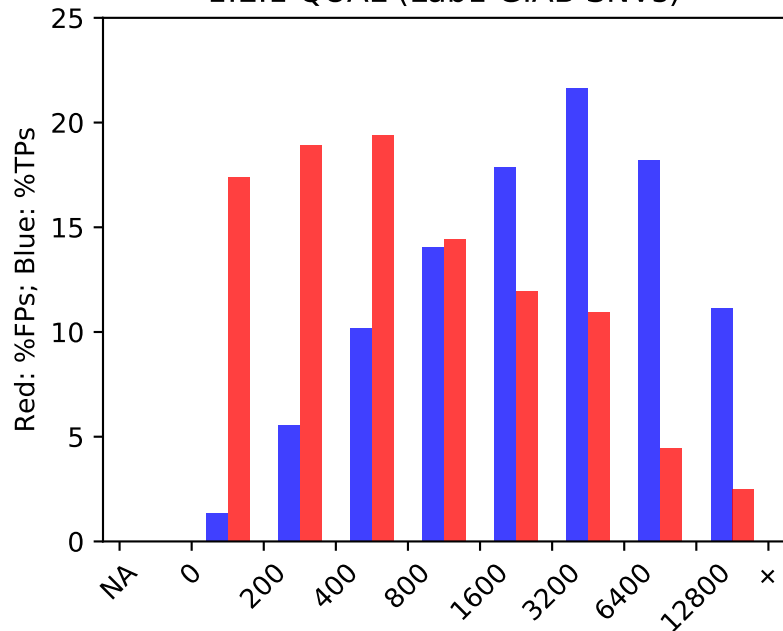

1.E.2 QUAL (Lab1 GIAB SNVs)

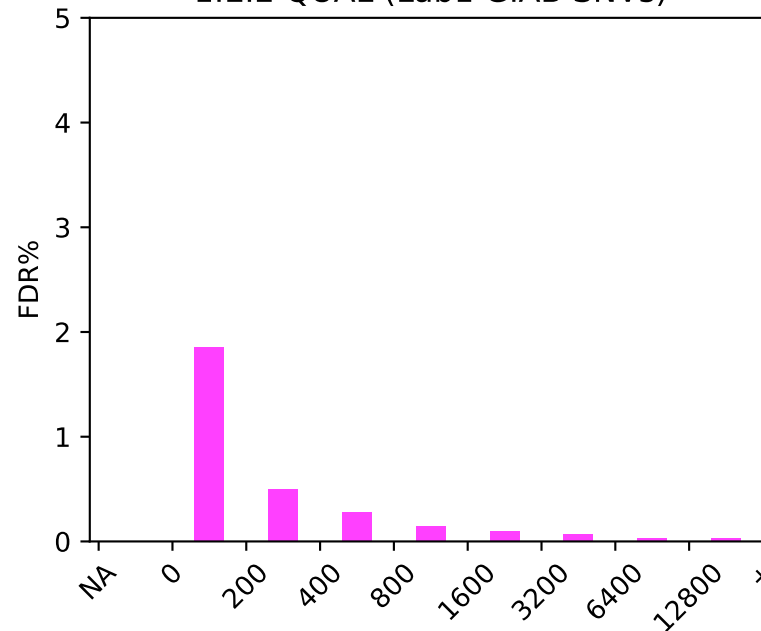

1.E.3 QUAL (Lab1 GIAB SNVs)

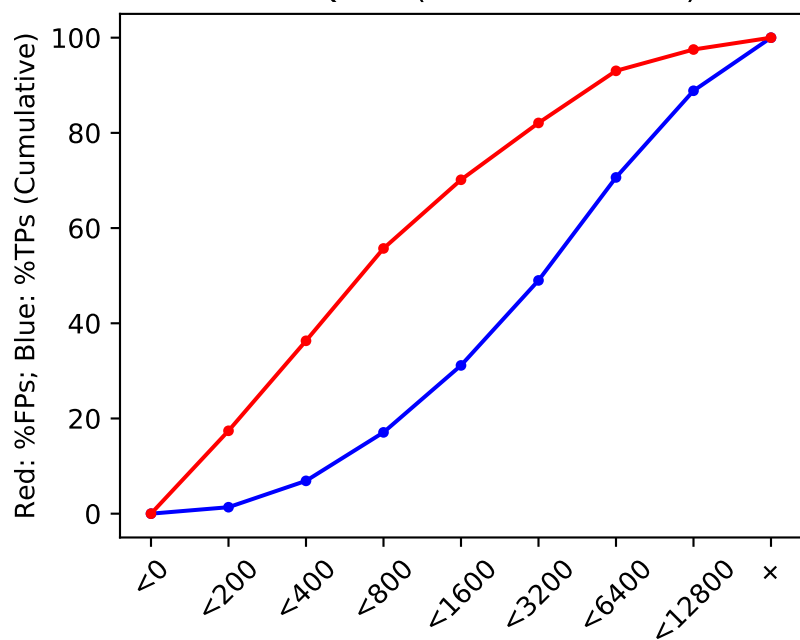

1.E.4 QUAL (Lab1 GIAB SNVs)

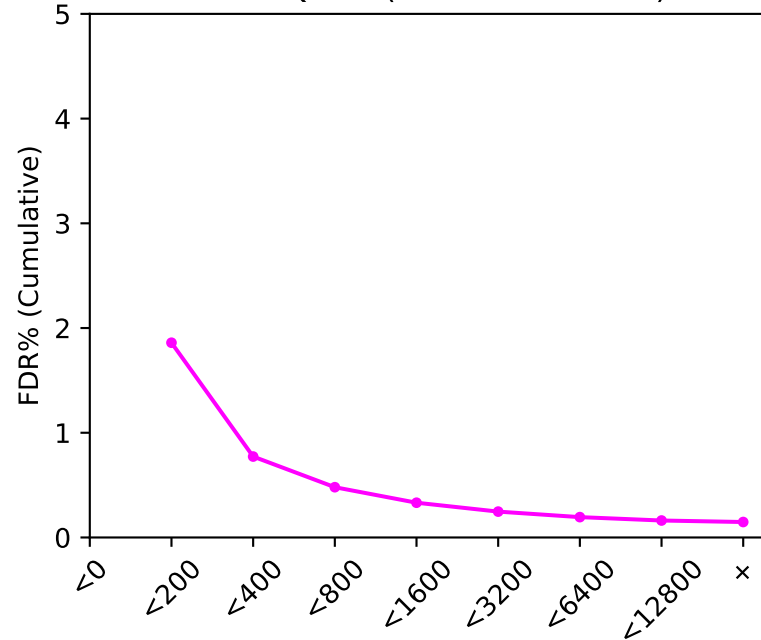

1.F.1 QD (Lab1 GIAB SNVs)

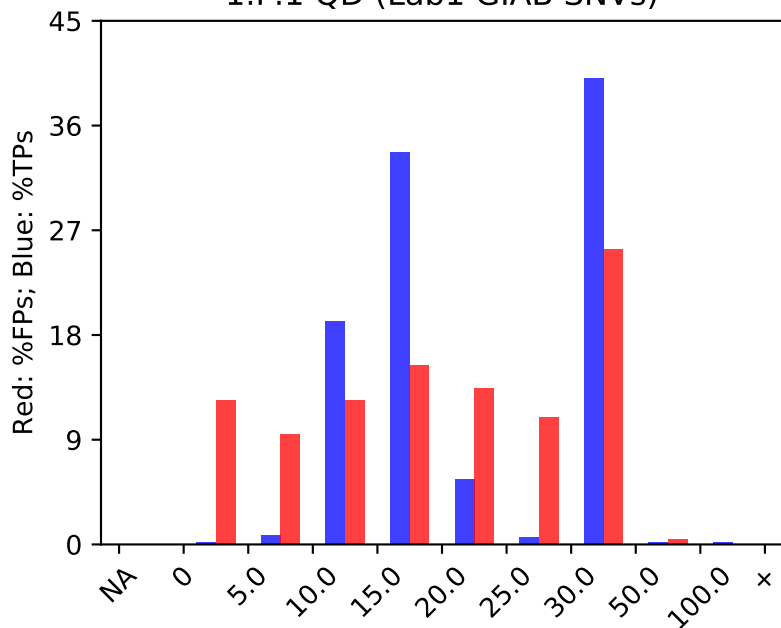

1.F.2 QD (Lab1 GIAB SNVs)

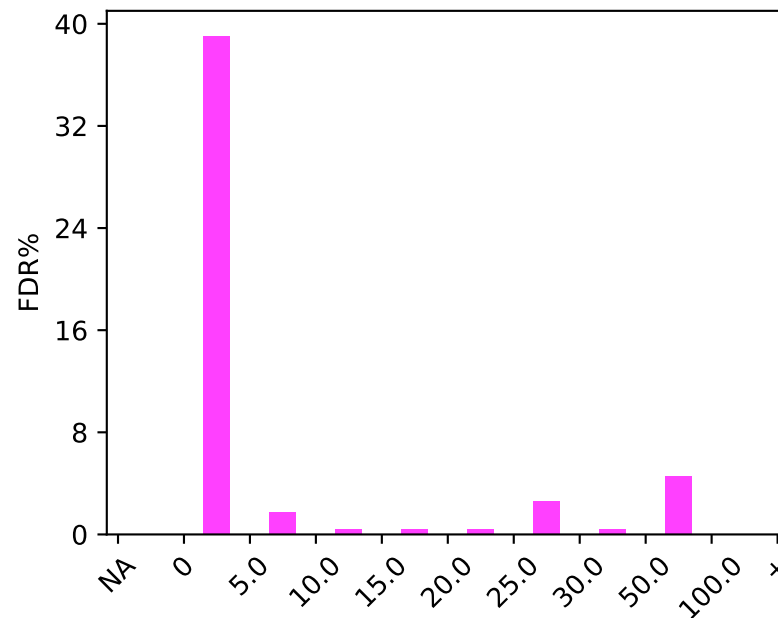

1.F.3 QD (Lab1 GIAB SNVs)

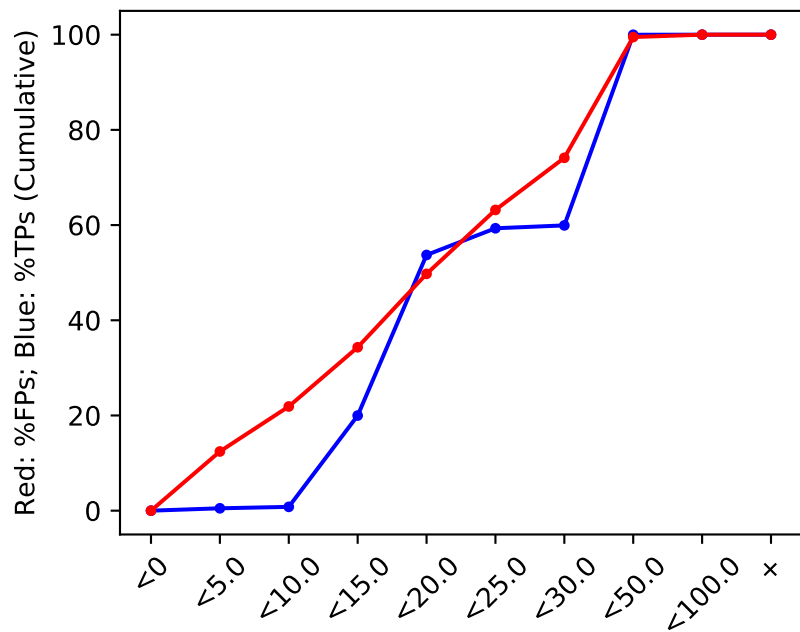

1.F.4 QD (Lab1 GIAB SNVs)

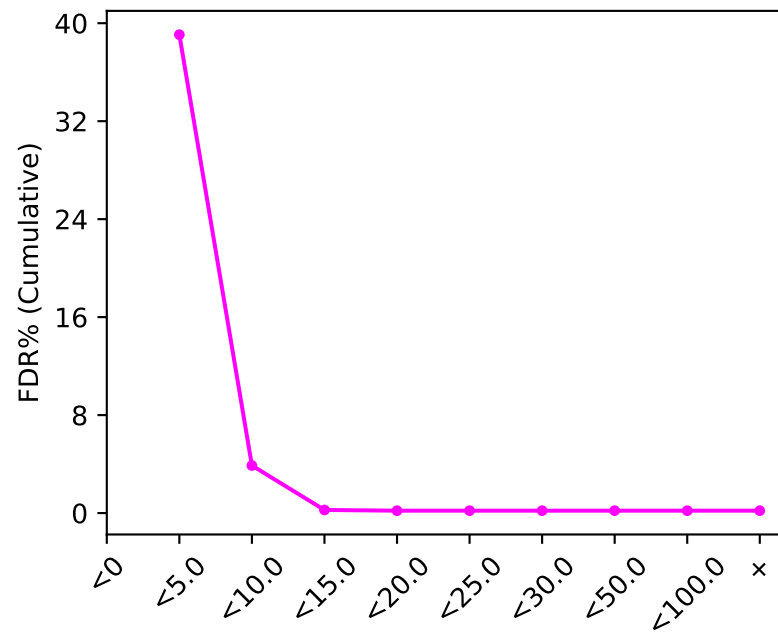

1.G.1 SB5 (Lab1 GIAB SNVs)

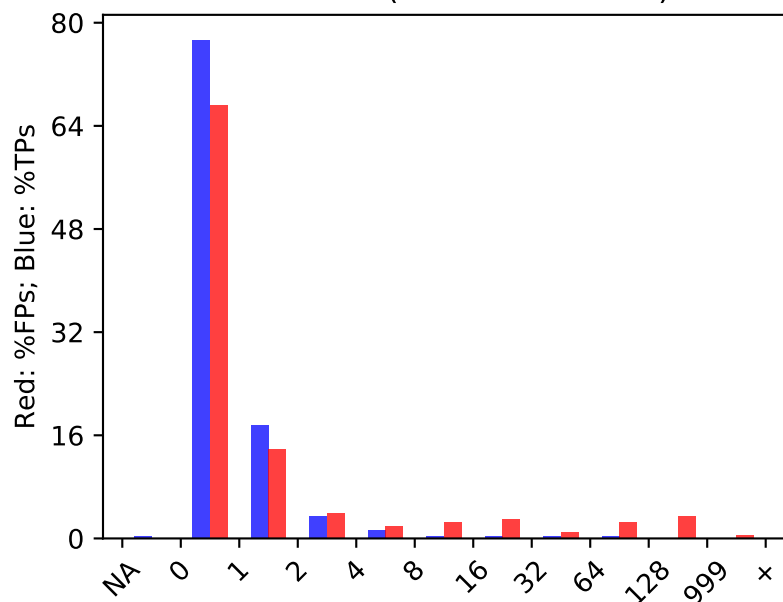

1.G.2 SB5 (Lab1 GIAB SNVs)

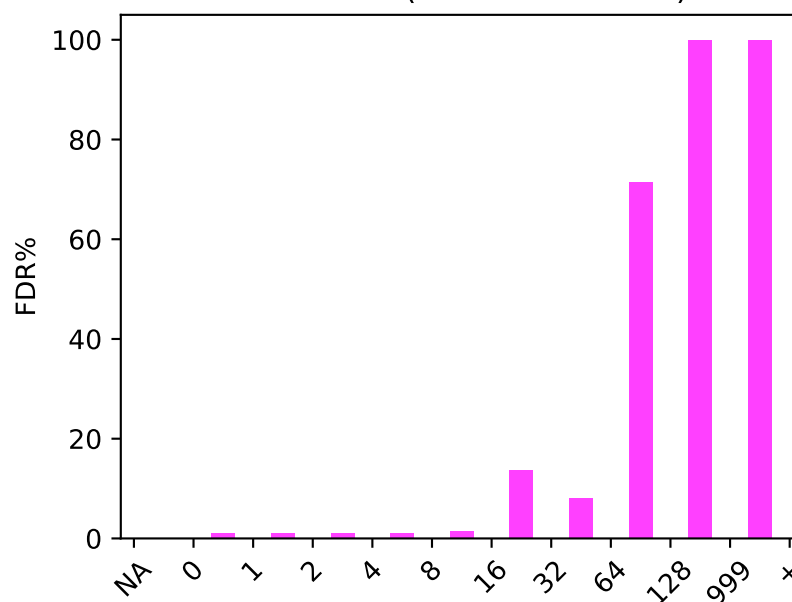

1.G.3 SB5 (Lab1 GIAB SNVs)

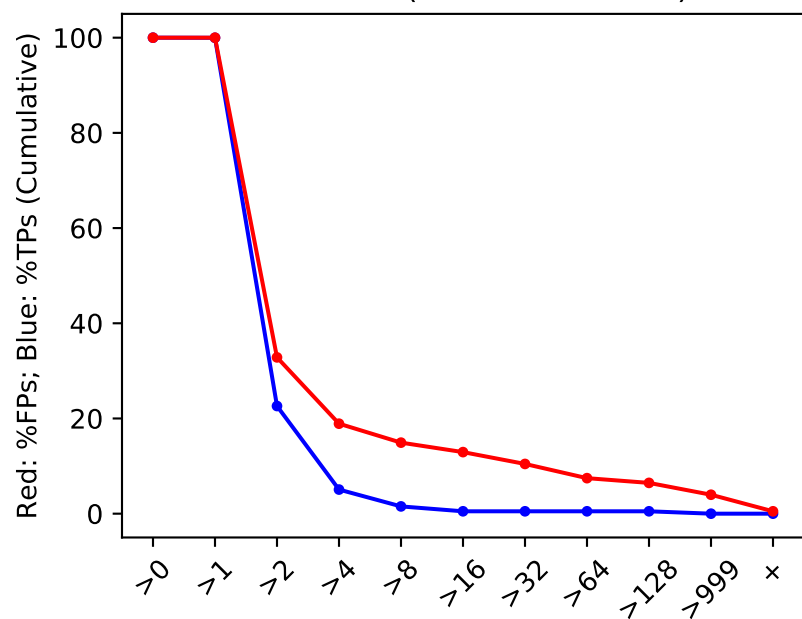

1.G.4 SB5 (Lab1 GIAB SNVs)

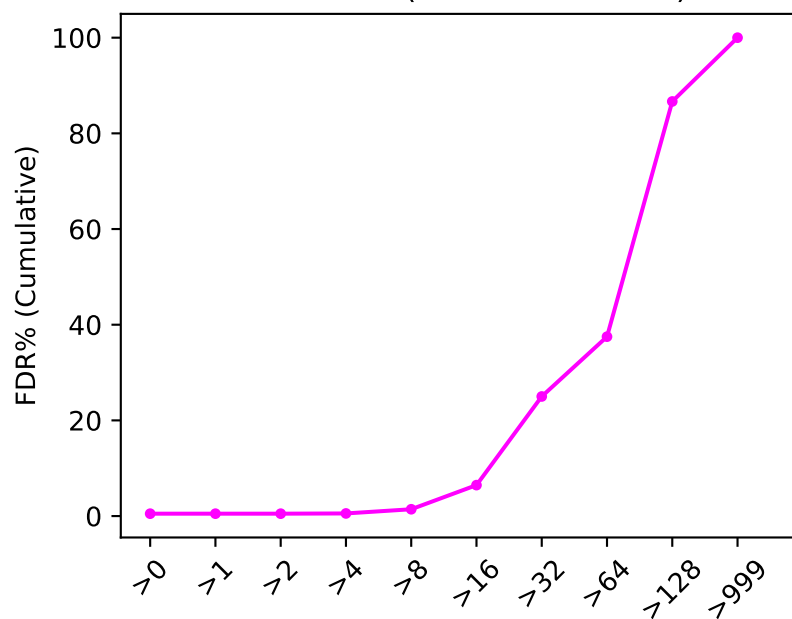



1.H.1 SB25 (Lab1 GIAB SNVs)

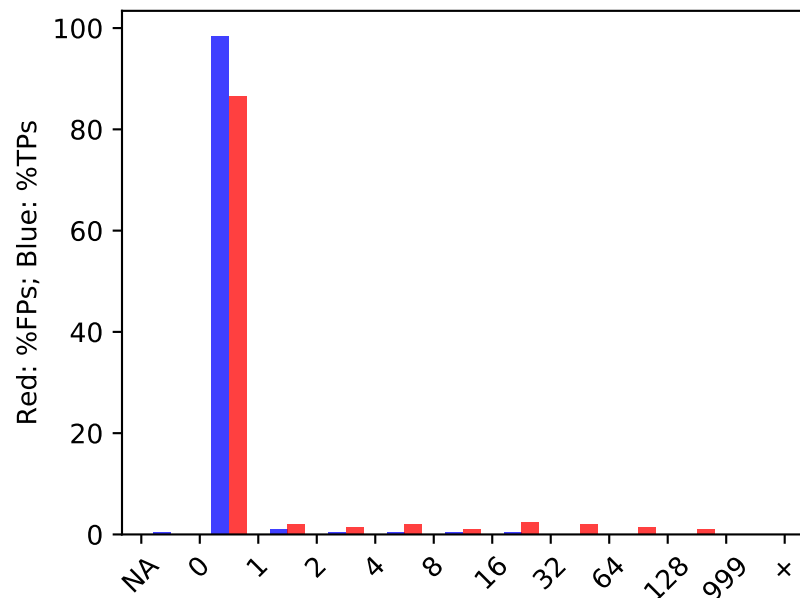

1.H.2 SB25 (Lab1 GIAB SNVs)

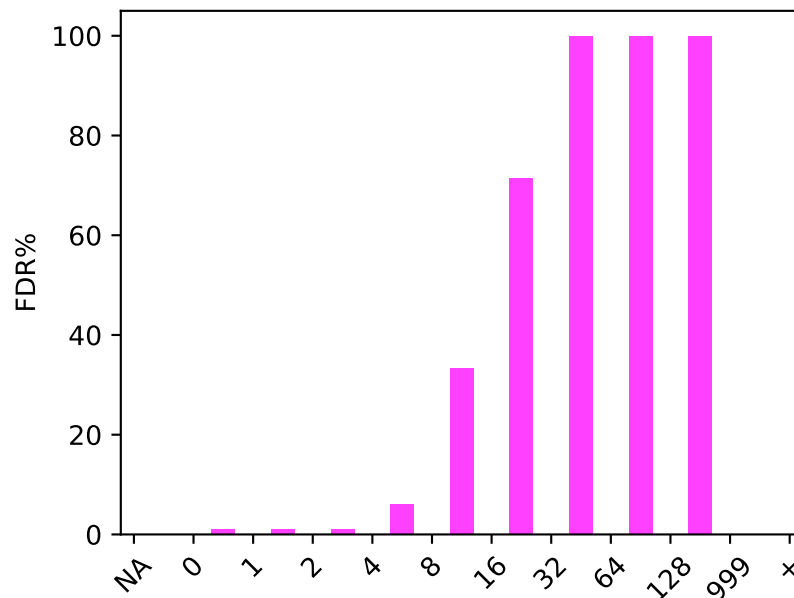

1.H.3 SB25 (Lab1 GIAB SNVs)

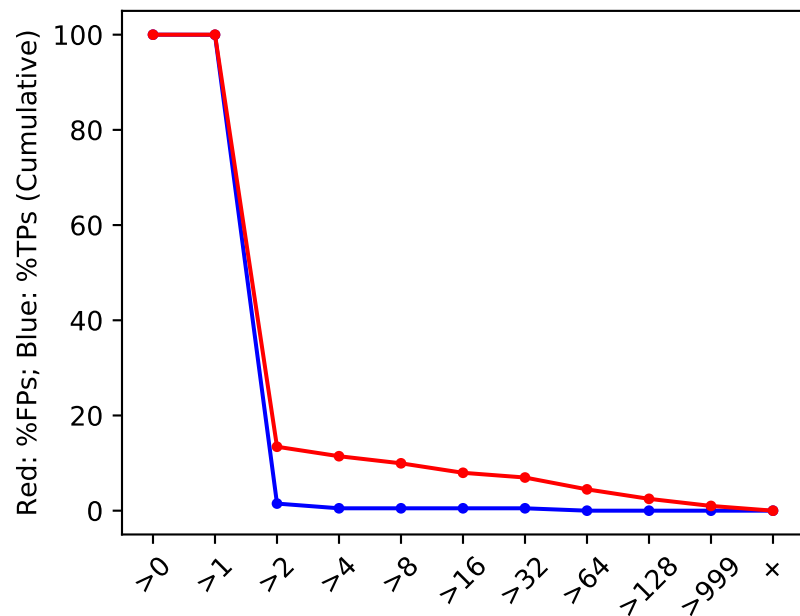

1.H.4 SB25 (Lab1 GIAB SNVs)

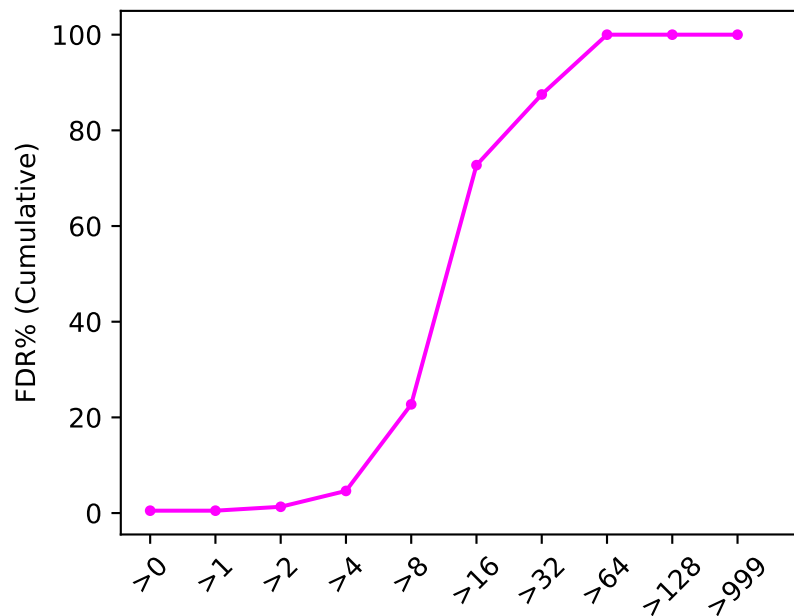

1.K.1 DP/DP ratio (Lab1 GIAB SNVs)

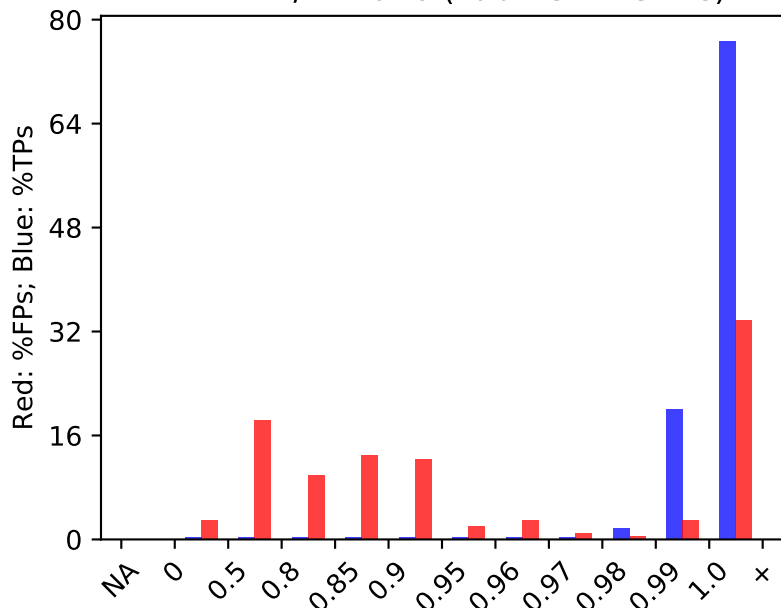

1.K.2 DP/DP ratio (Lab1 GIAB SNVs)

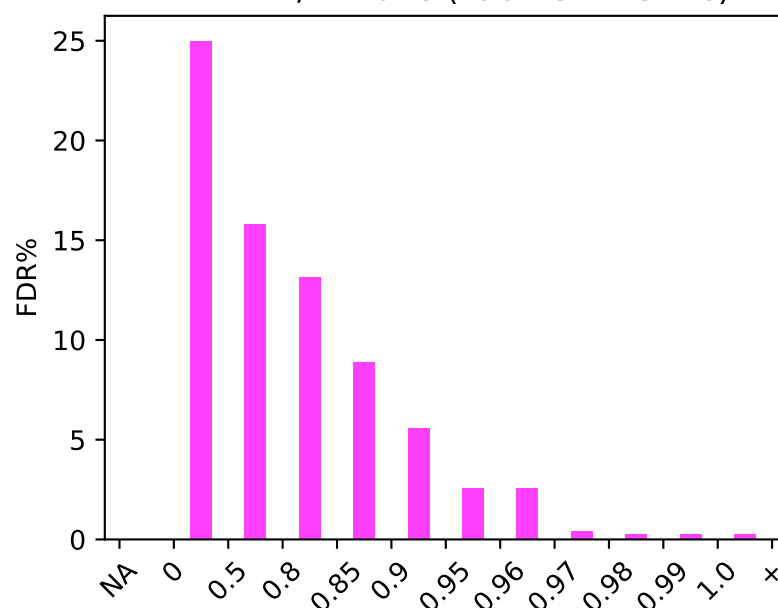

1.K.3 DP/DP ratio (Lab1 GIAB SNVs)

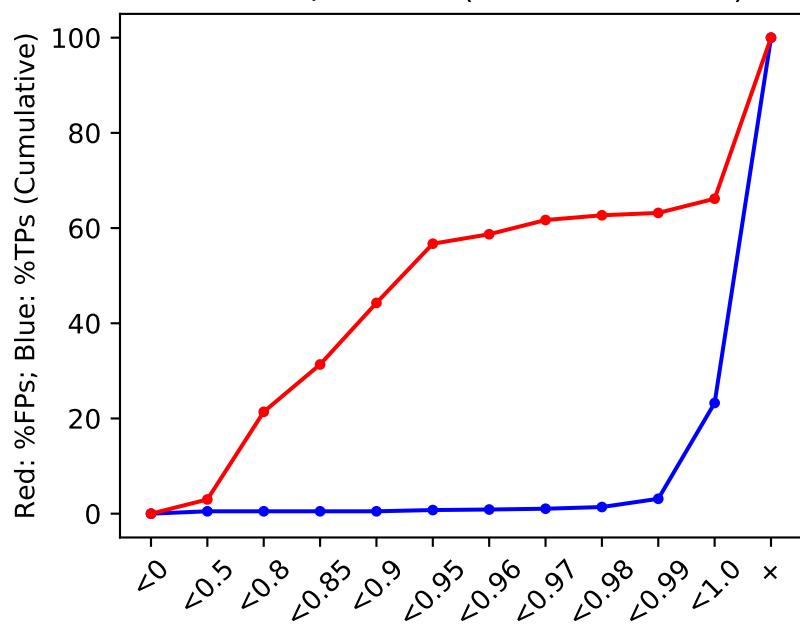

1.K.4 DP/DP ratio (Lab1 GIAB SNVs)

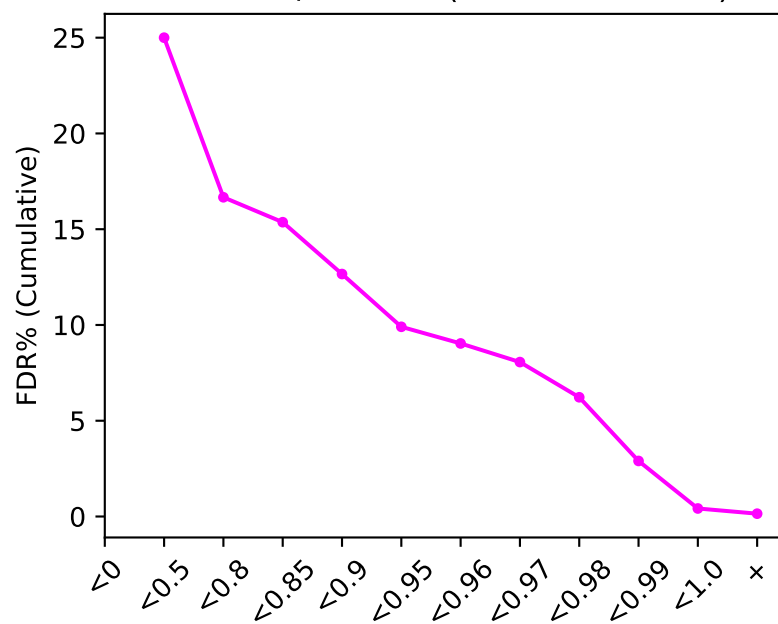

1.L.1 NEARBY-VARS (Lab1 GIAB SNVs)

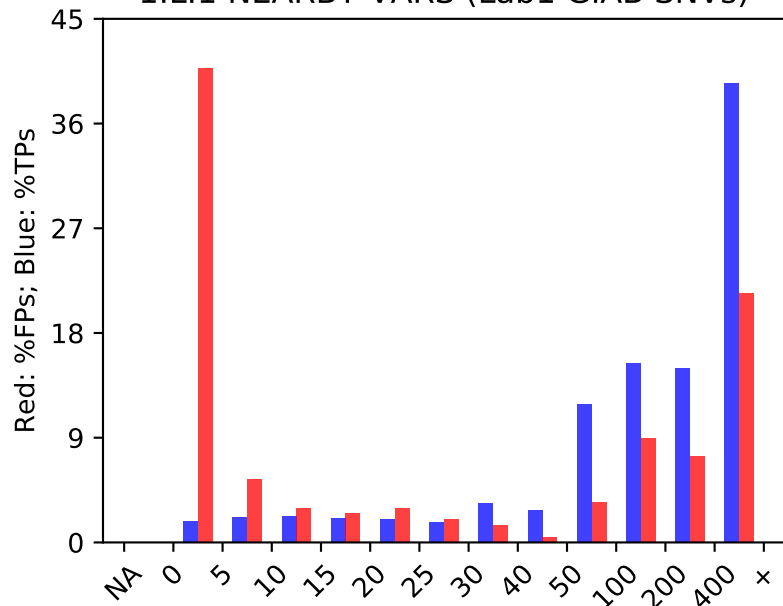

1.L.2 NEARBY-VARS (Lab1 GIAB SNVs)

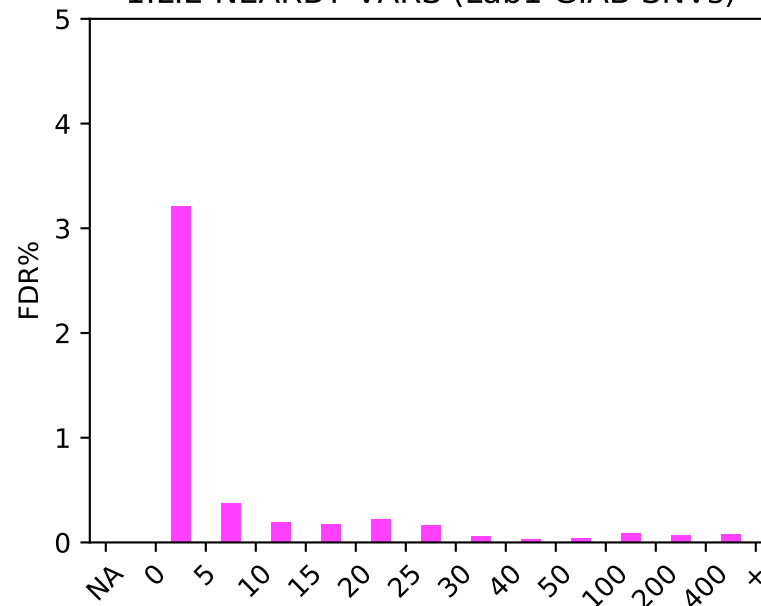

1.L.3 NEARBY-VARS (Lab1 GIAB SNVs)

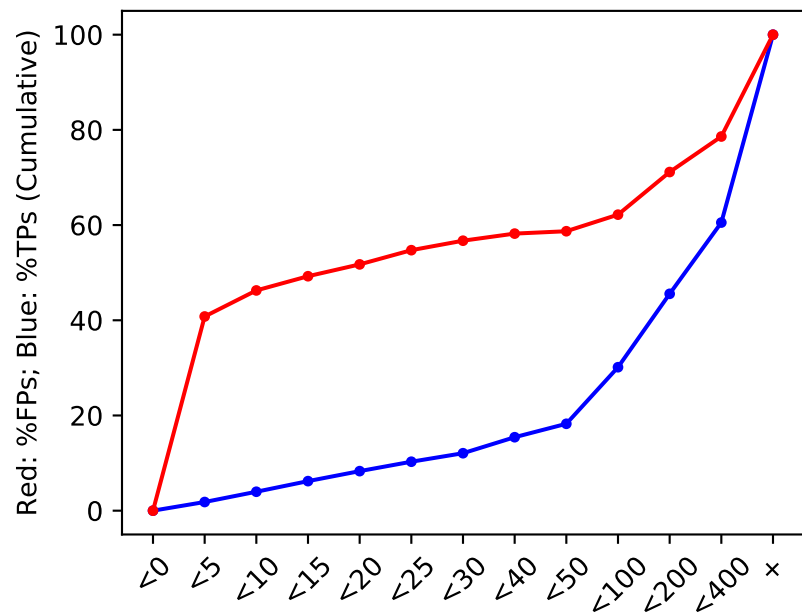

1.L.4 NEARBY-VARS (Lab1 GIAB SNVs)

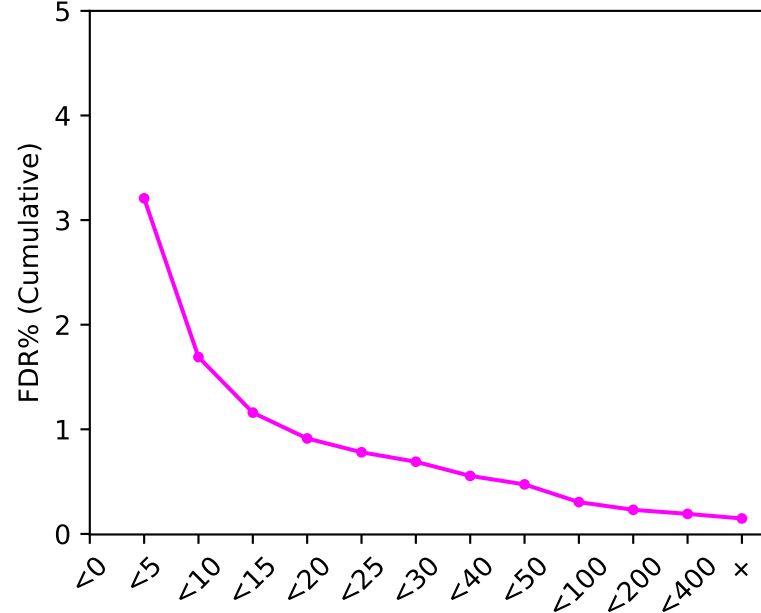

1.N.1 Binary warnings (Lab1 GIAB SNVs)

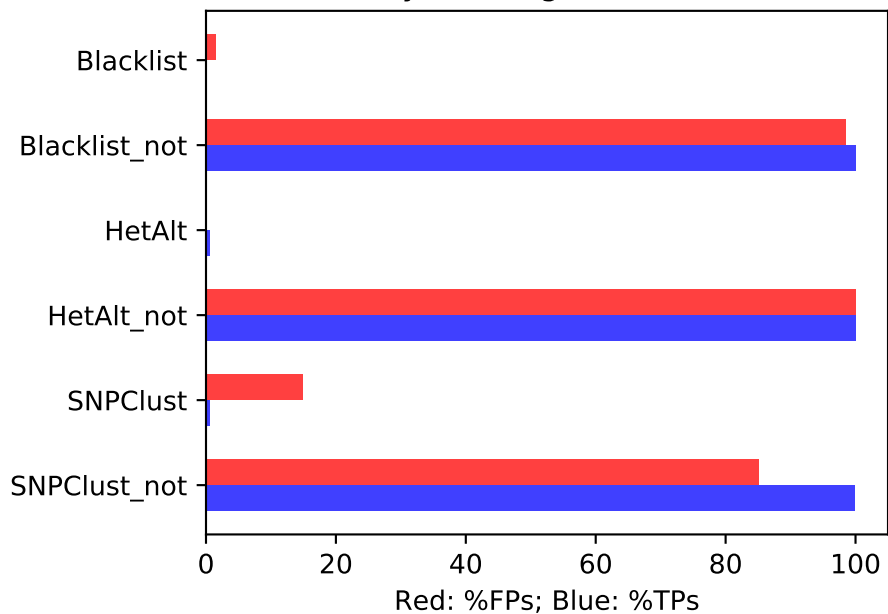

1.N.2 Binary warnings (Lab1 GIAB SNVs)

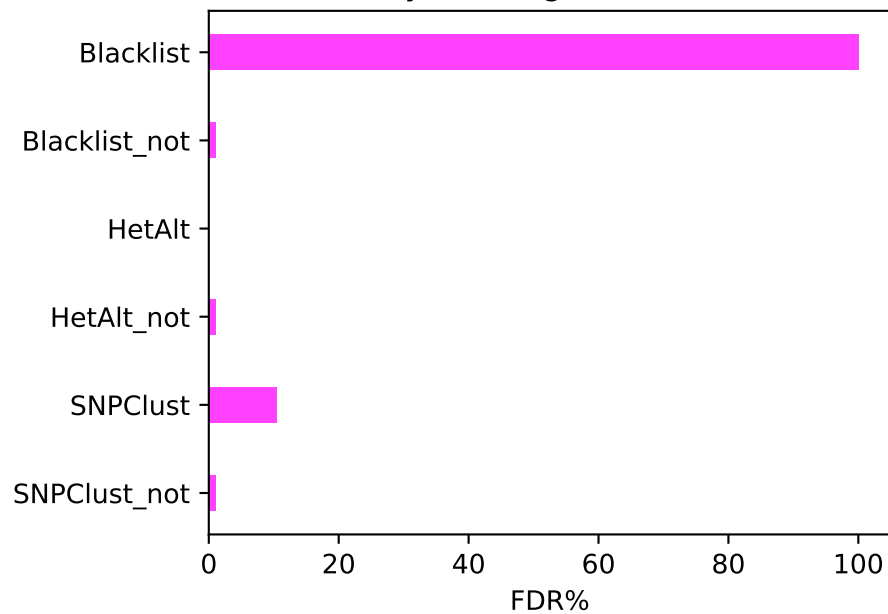

1.O.1 Genomic Context (Lab1 GIAB SNVs)

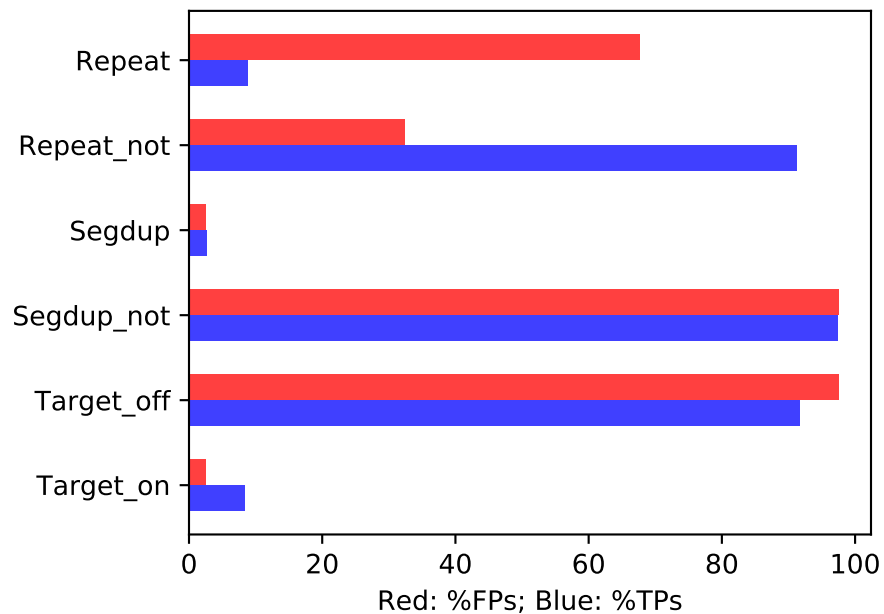

1.O.2 Genomic Context (Lab1 GIAB SNVs)

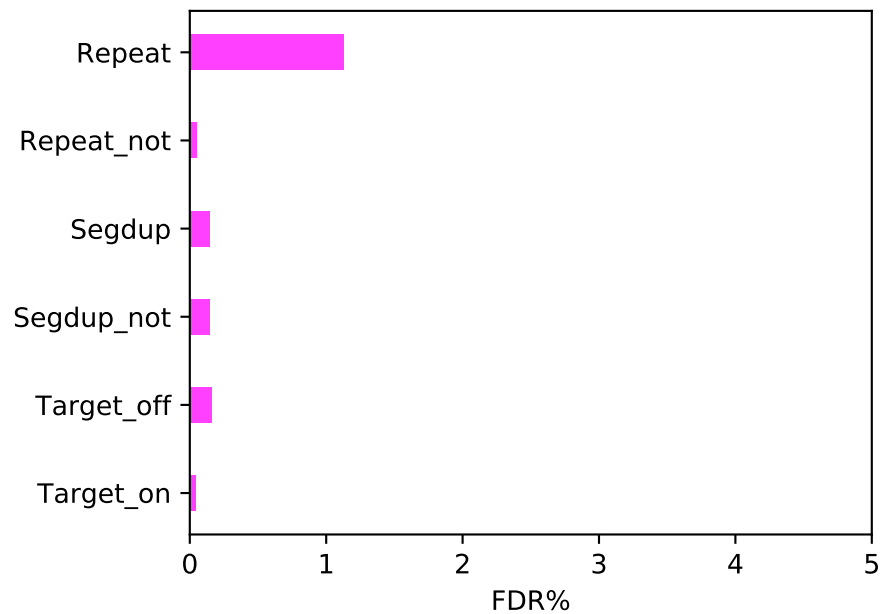

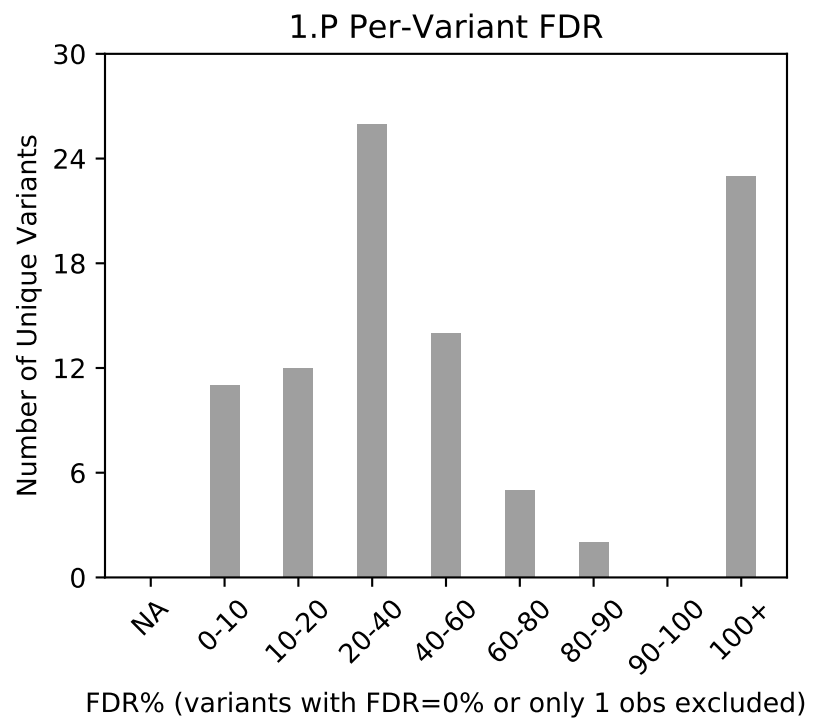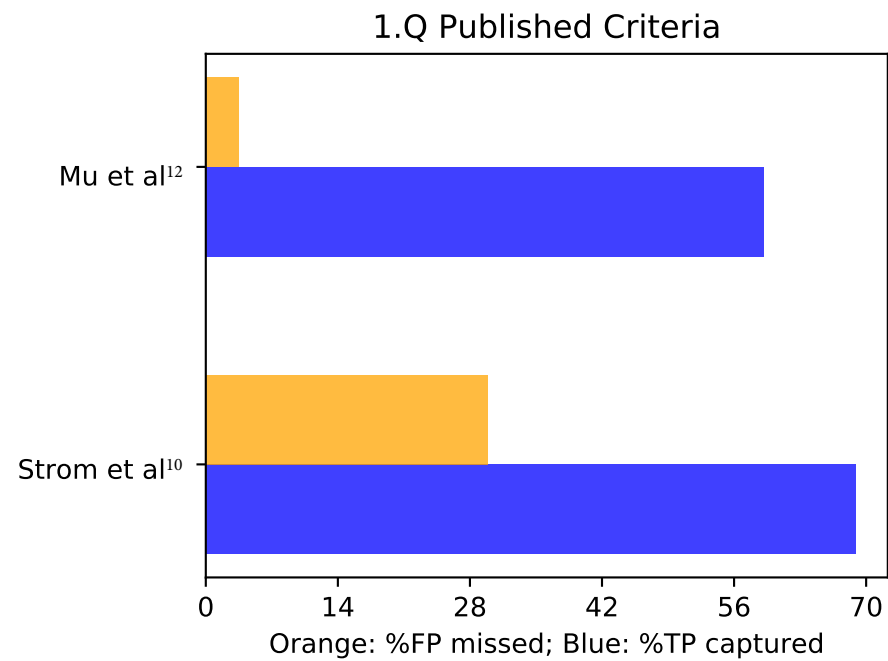

Supplement: mmc1.pdf [file mmc1.pdf]
