# Supplementary material
Source: PubMed Central journal article supplement (PMC6848948)

Supplemental Fig 2: Lab1 GIAB Indel

|                    |       |       |
|--------------------|-------|-------|
| TP Variant Calls   | 14594 | 93.7% |
| FP Variant Calls   | 980   | 6.3%  |
| Unique Variants    | 3715  |       |
| Unique FP Variants | 518   |       |

2.A.1 INFO\_DP (Lab1 GIAB Indel)

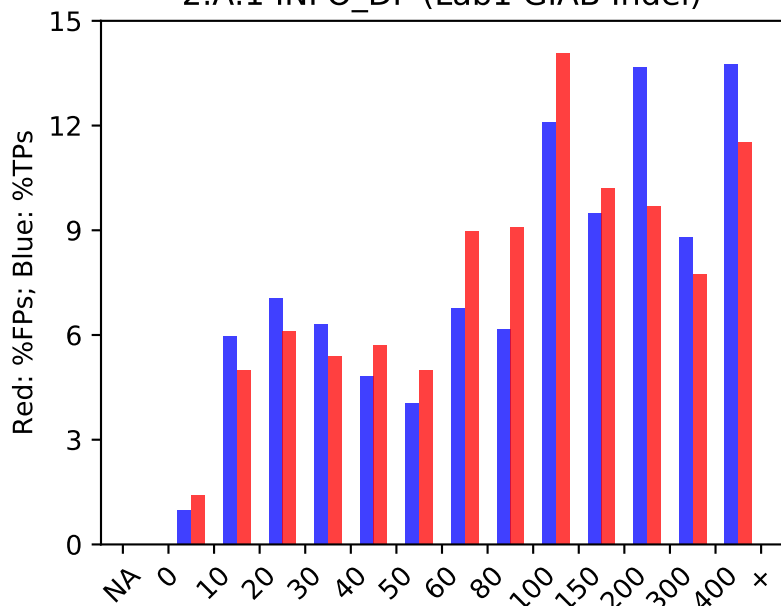

2.A.2 INFO\_DP (Lab1 GIAB Indel)

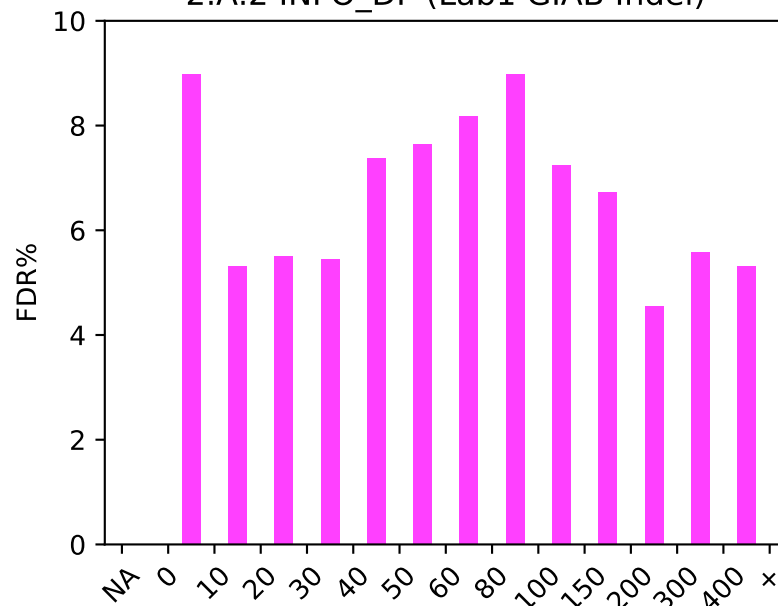

2.A.3 INFO\_DP (Lab1 GIAB Indel)

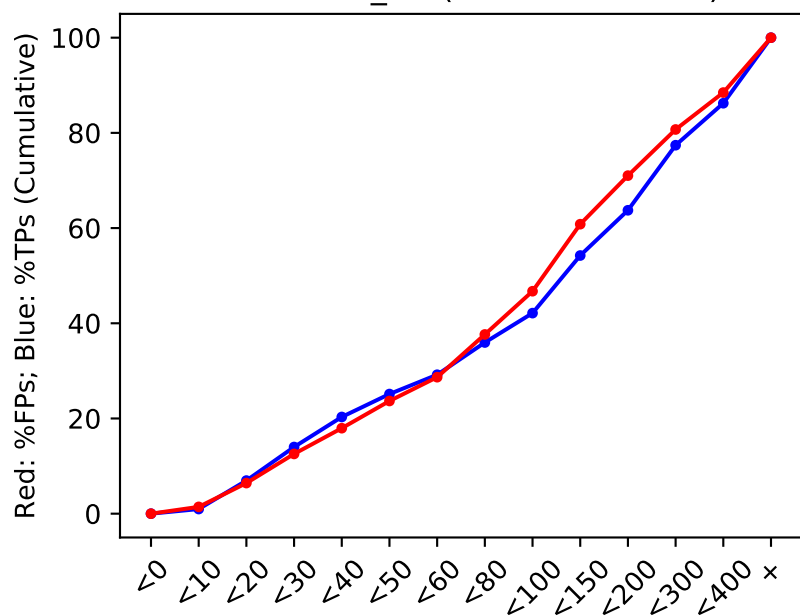

2.A.4 INFO\_DP (Lab1 GIAB Indel)

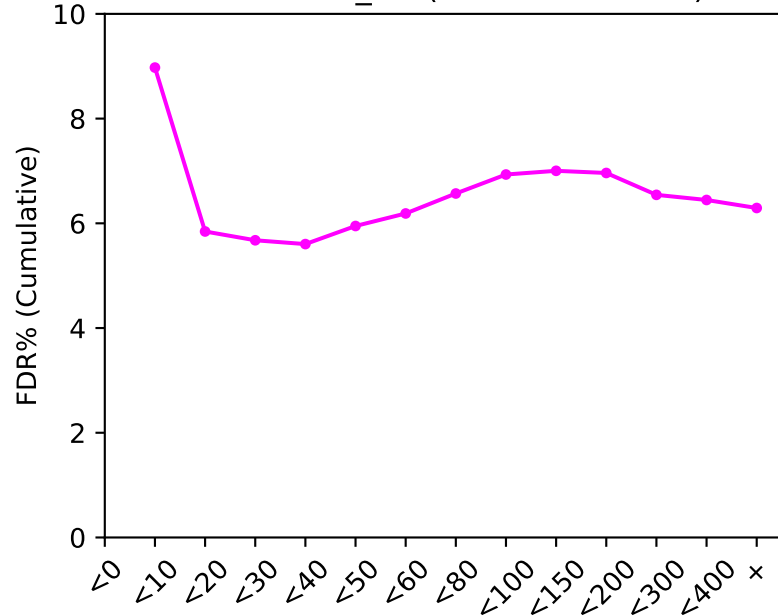

2.B.1 GT\_DP (Lab1 GIAB Indel)

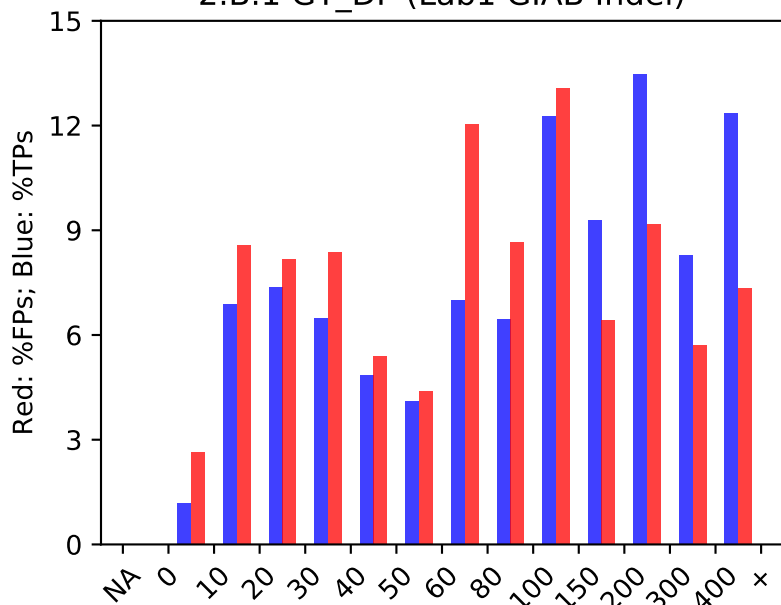

2.B.2 GT\_DP (Lab1 GIAB Indel)

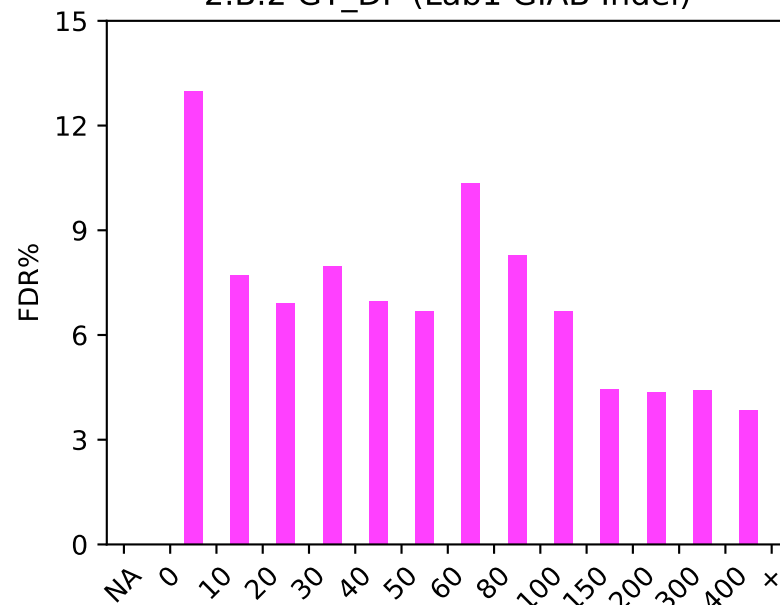

2.B.3 GT\_DP (Lab1 GIAB Indel)

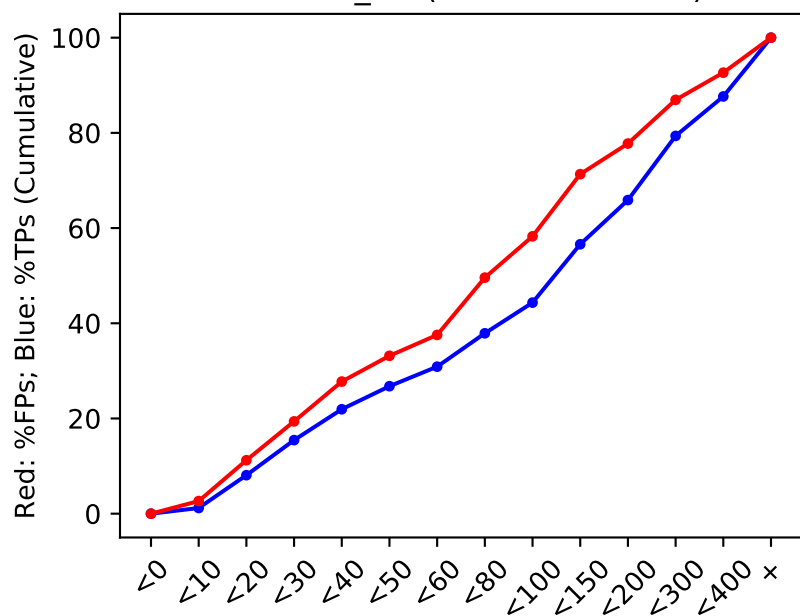

2.B.4 GT\_DP (Lab1 GIAB Indel)

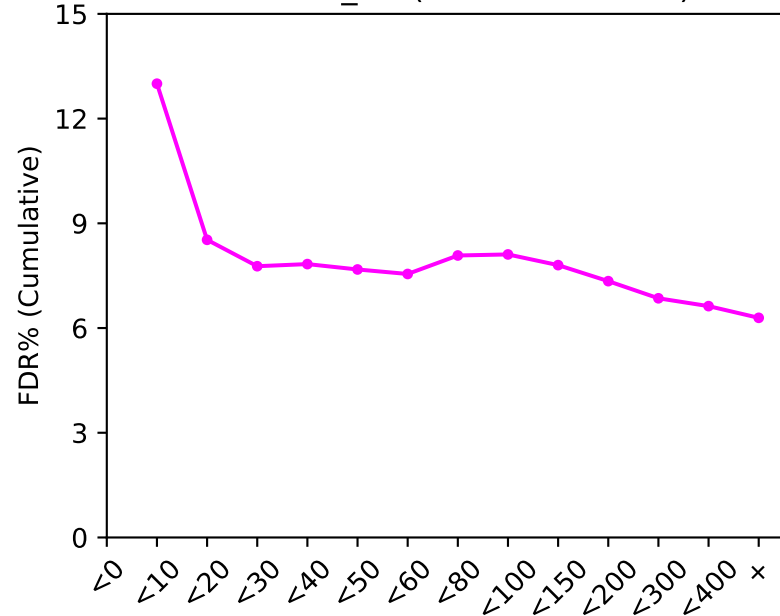

2.C.1 ABnorm (Lab1 GIAB Indel)

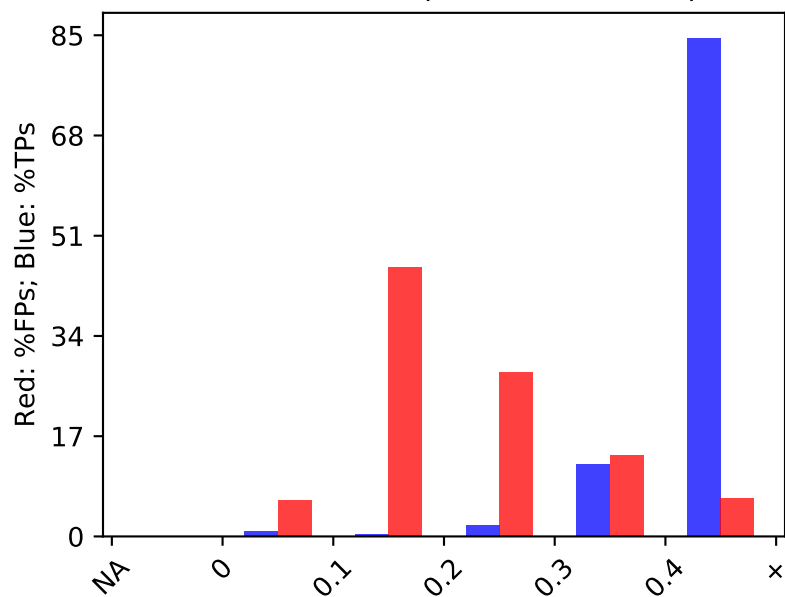

2.C.2 ABnorm (Lab1 GIAB Indel)

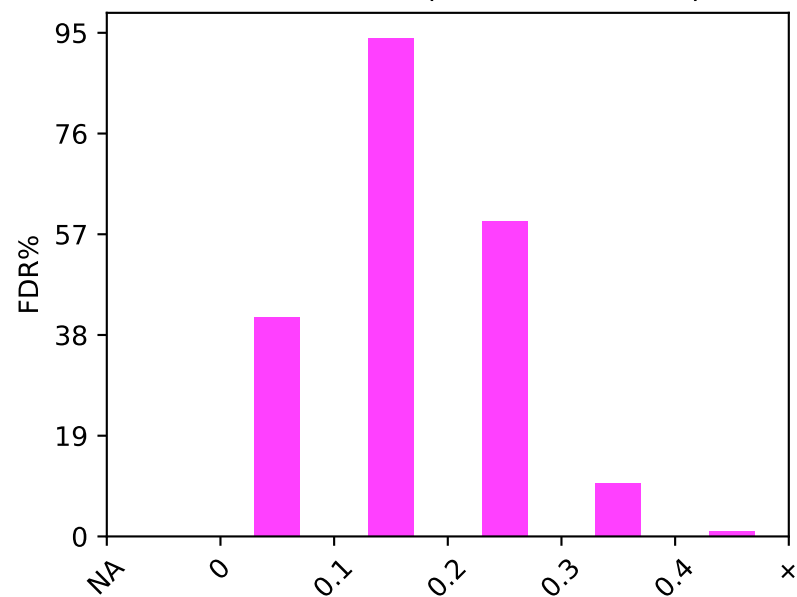

2.C.3 ABnorm (Lab1 GIAB Indel)

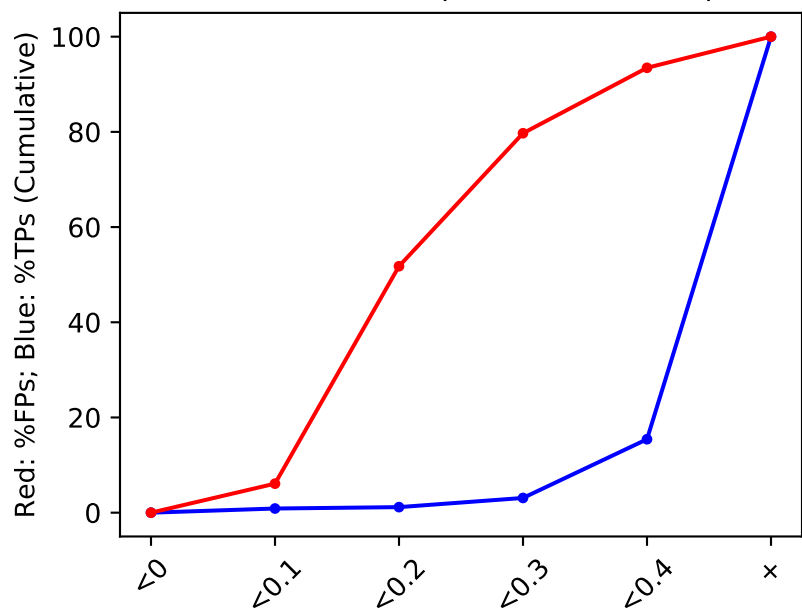

2.C.4 ABnorm (Lab1 GIAB Indel)

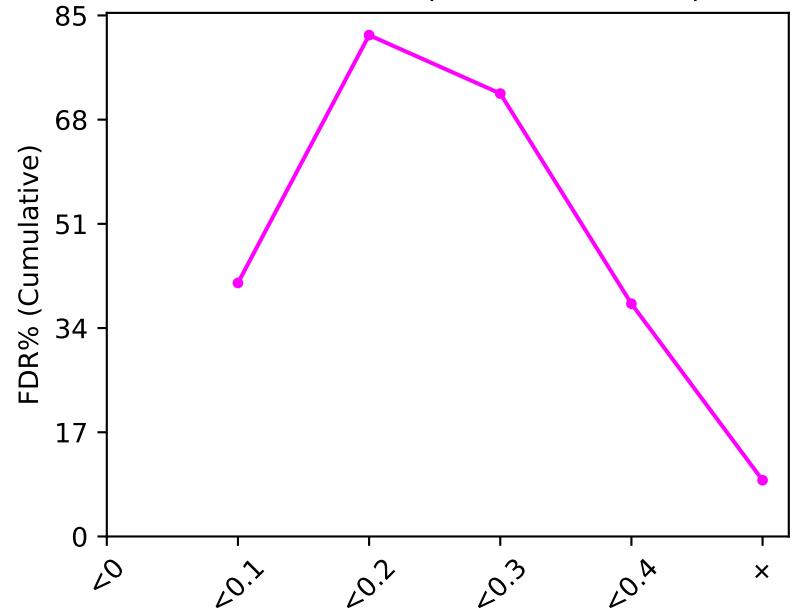

2.D.1 ABhom (Lab1 GIAB Indel)

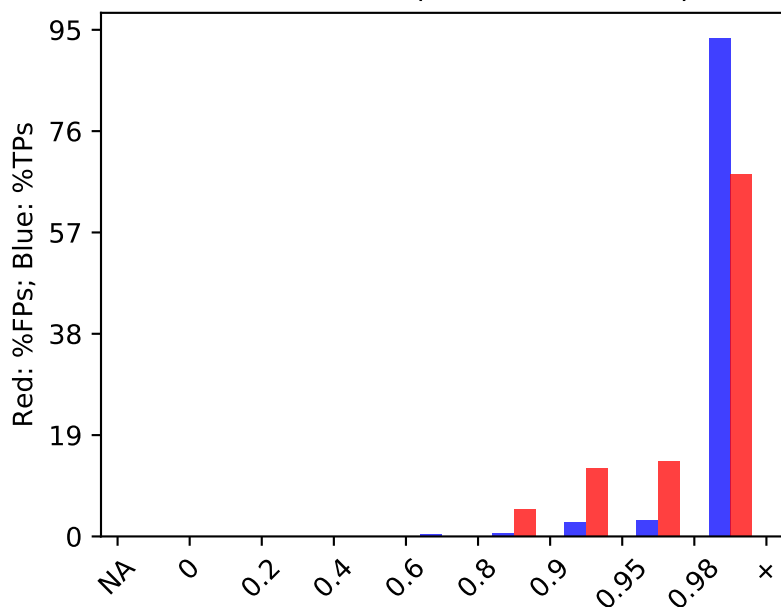

2.D.2 ABhom (Lab1 GIAB Indel)

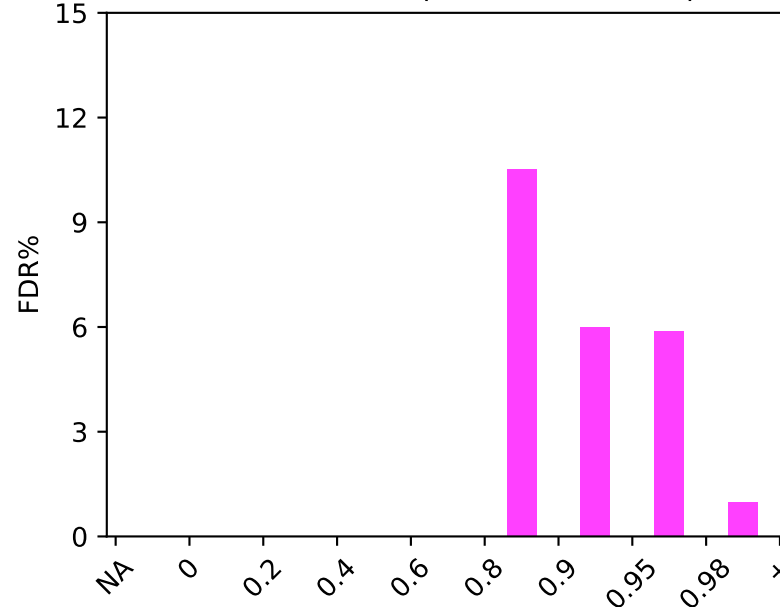

2.D.3 ABhom (Lab1 GIAB Indel)

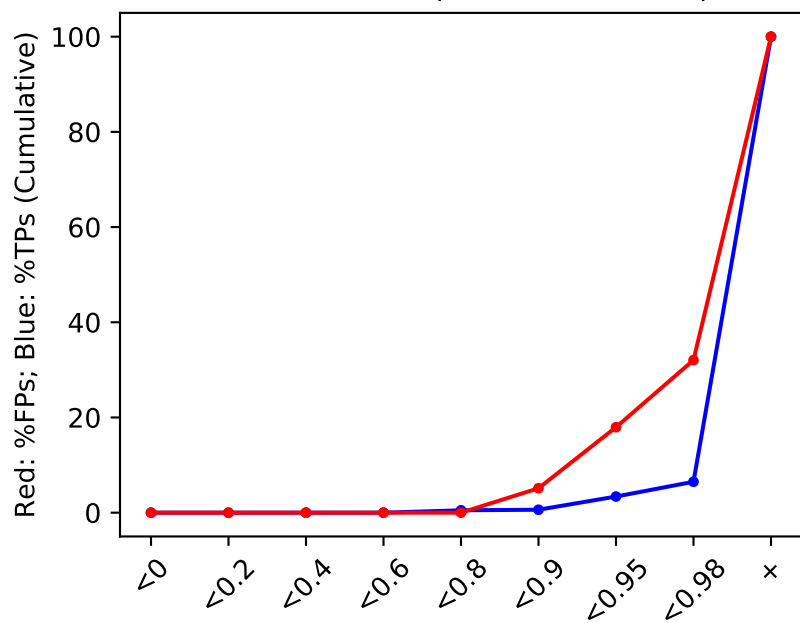

2.D.4 ABhom (Lab1 GIAB Indel)

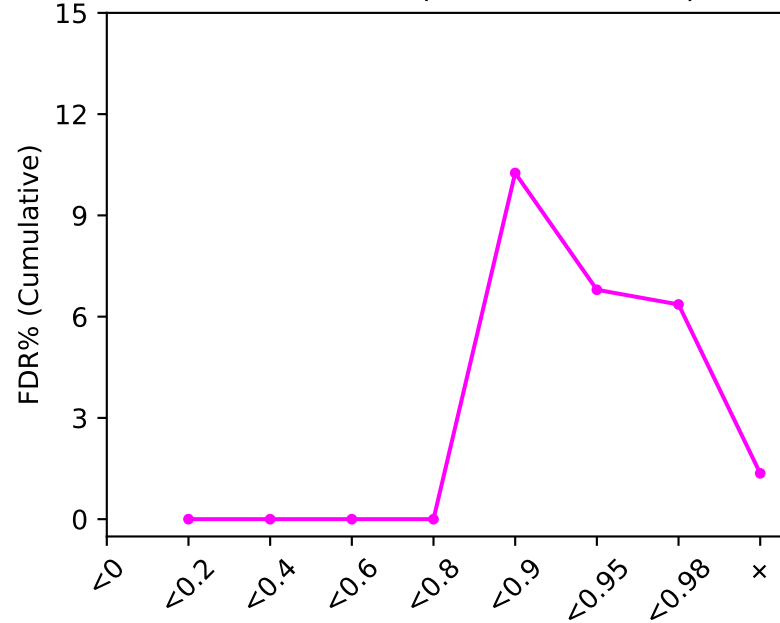

2.E.1 QUAL (Lab1 GIAB Indel)

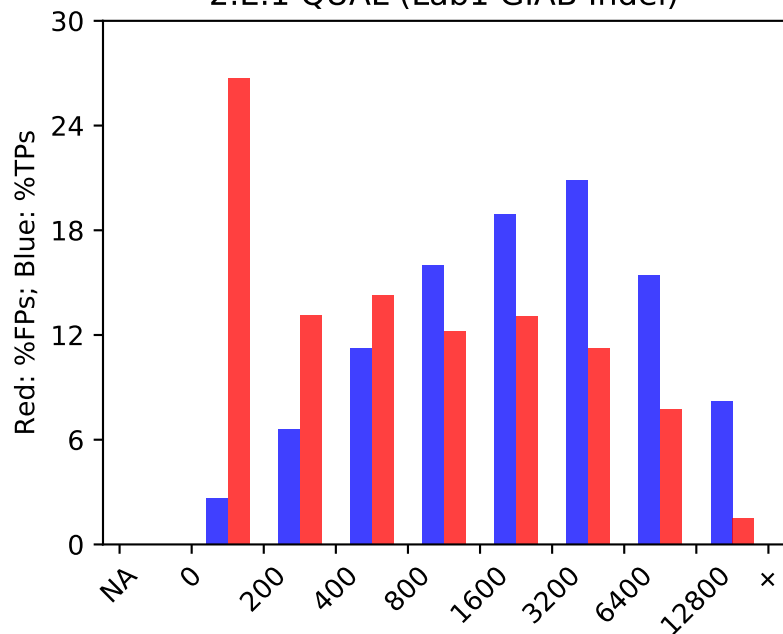

2.E.2 QUAL (Lab1 GIAB Indel)

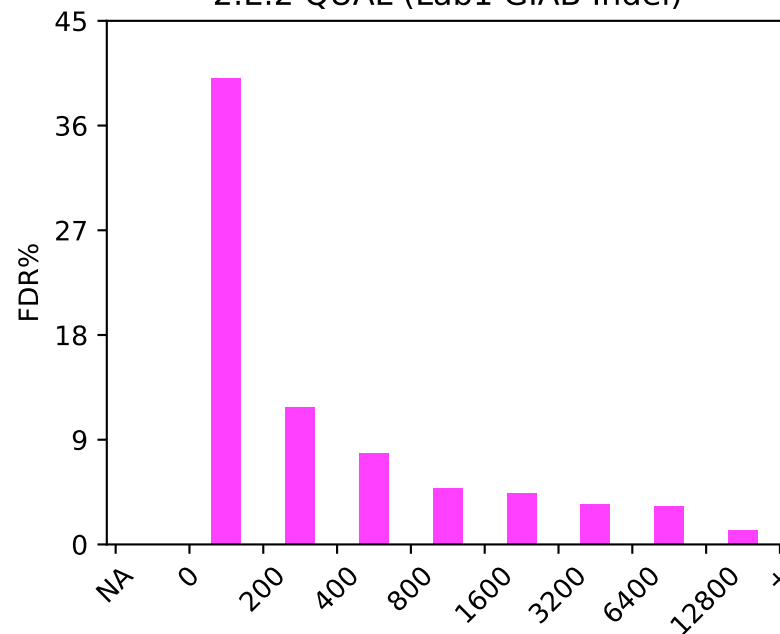

2.E.3 QUAL (Lab1 GIAB Indel)

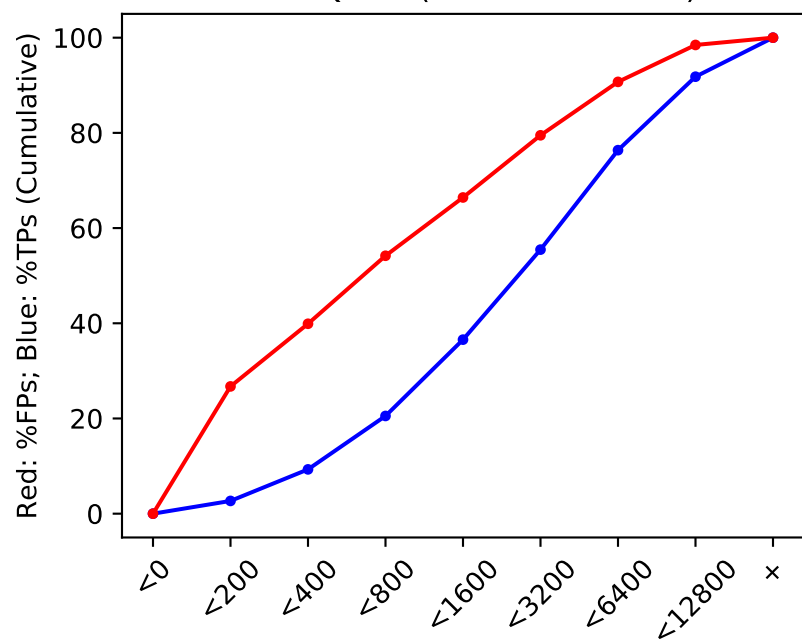

2.E.4 QUAL (Lab1 GIAB Indel)

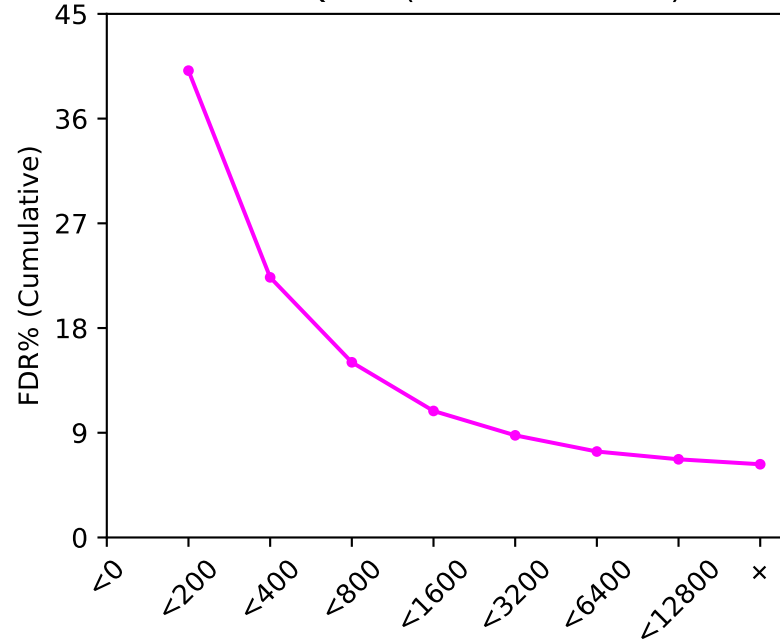

2.F.1 QD (Lab1 GIAB Indel)

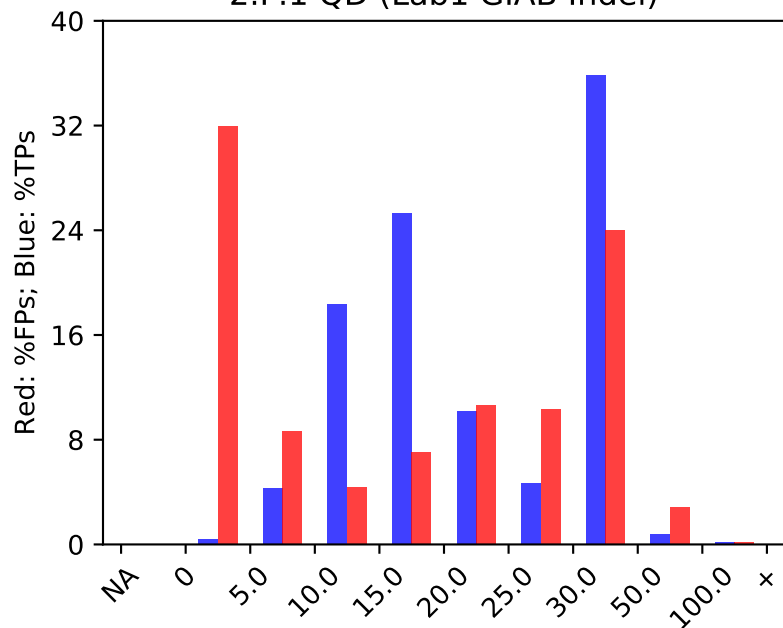

2.F.2 QD (Lab1 GIAB Indel)

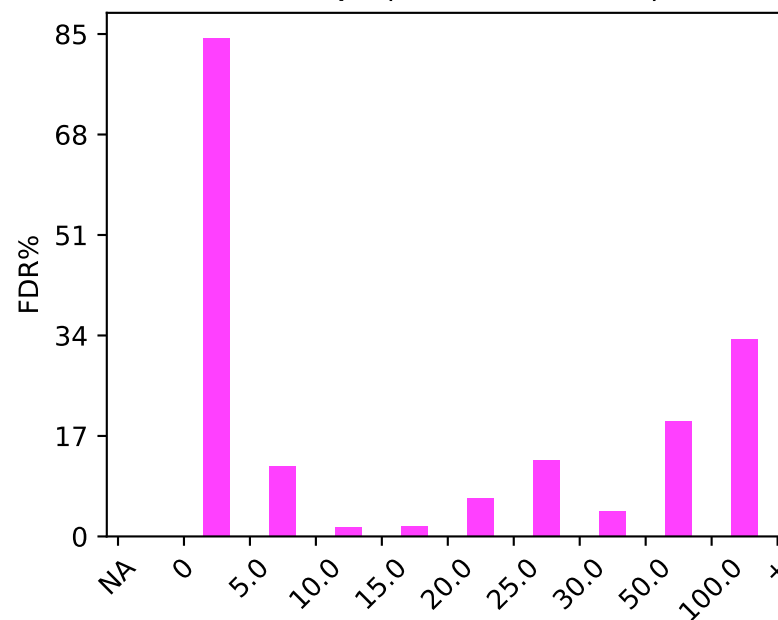

2.F.3 QD (Lab1 GIAB Indel)

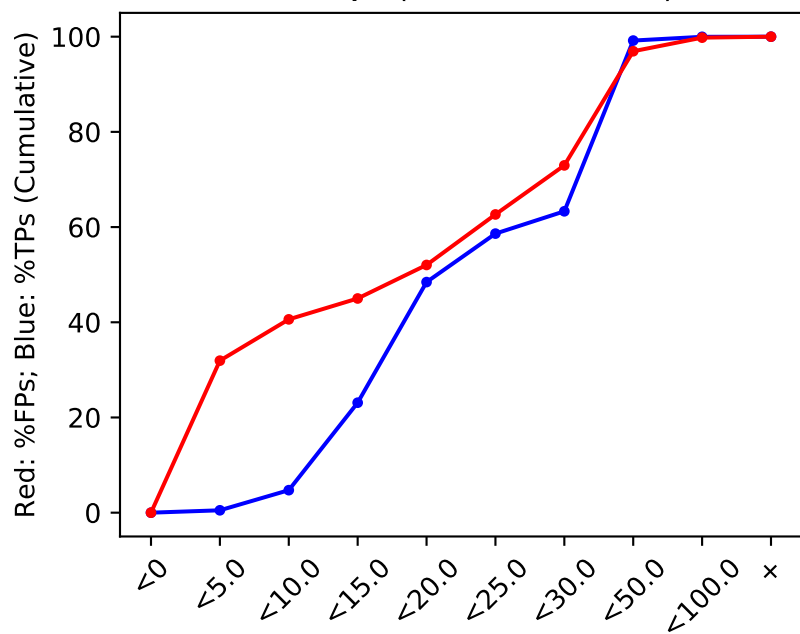

2.F.4 QD (Lab1 GIAB Indel)

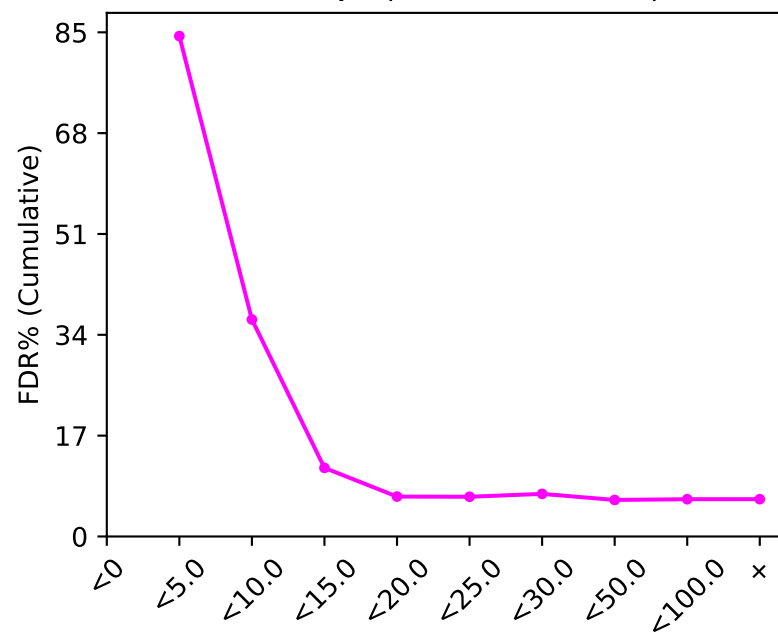

2.G.1 SB5 (Lab1 GIAB Indel)

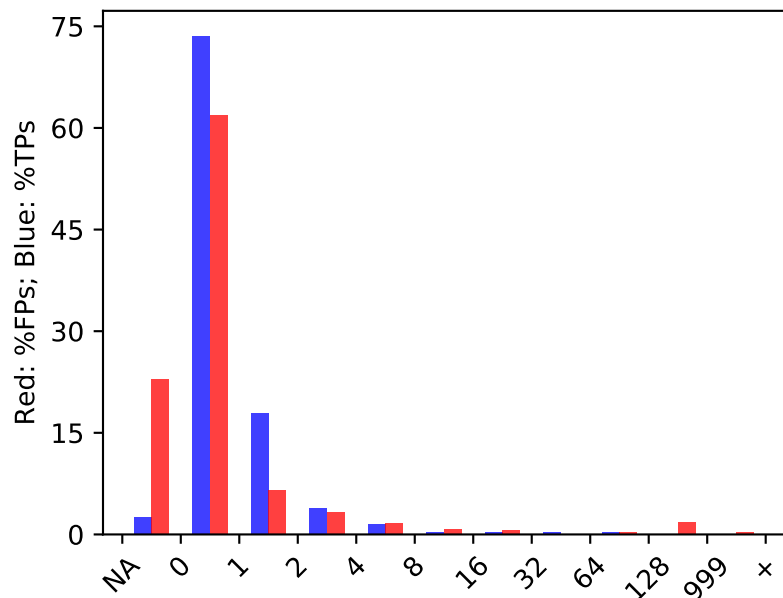

2.G.2 SB5 (Lab1 GIAB Indel)

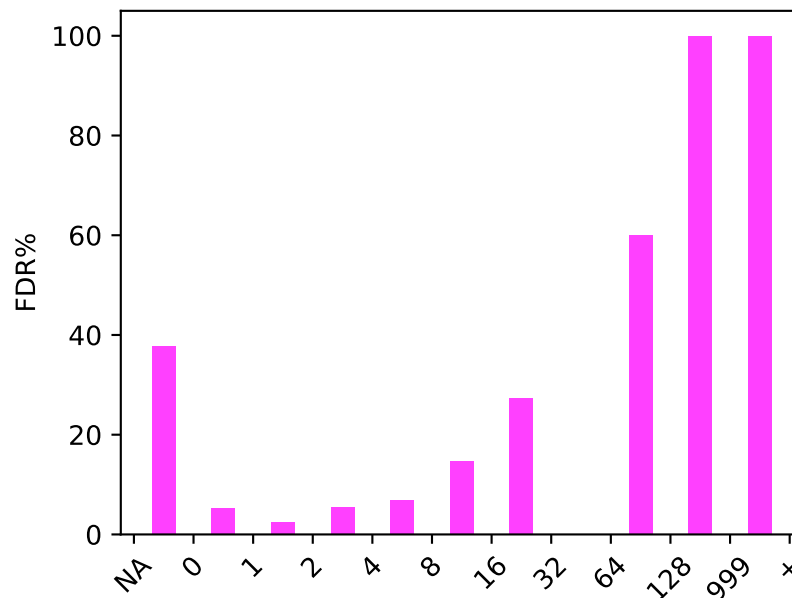

2.G.3 SB5 (Lab1 GIAB Indel)

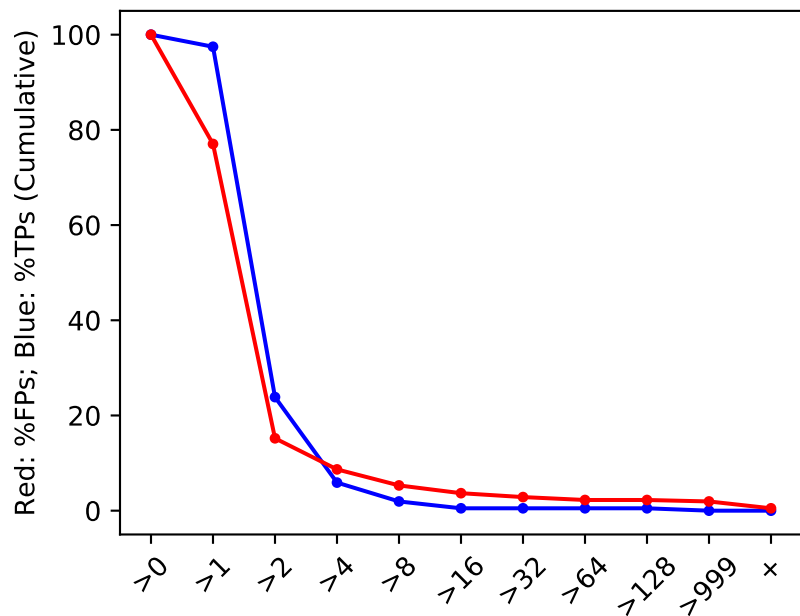

2.G.4 SB5 (Lab1 GIAB Indel)

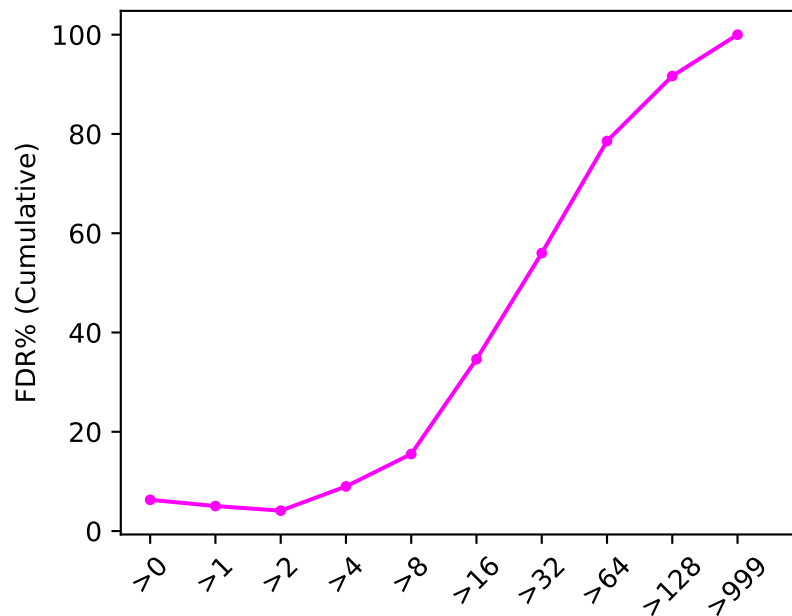



2.H.1 SB25 (Lab1 GIAB Indel)

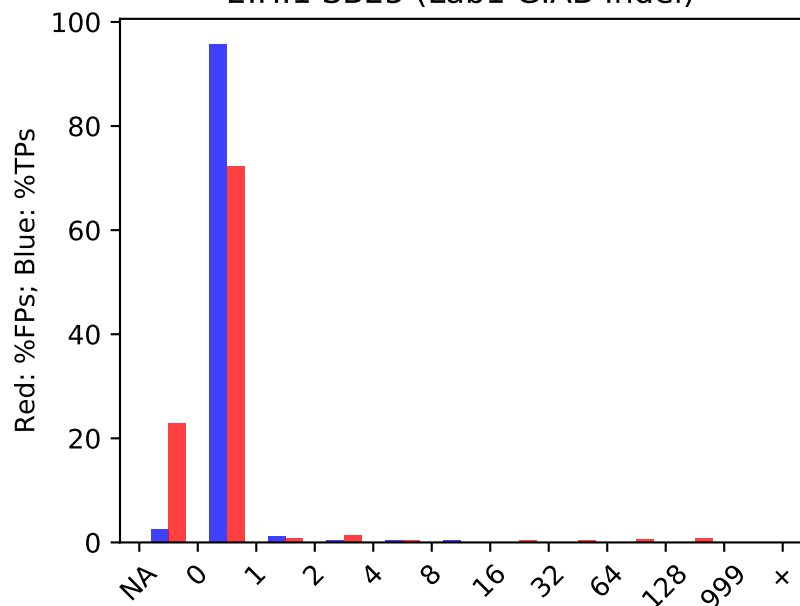

2.H.2 SB25 (Lab1 GIAB Indel)

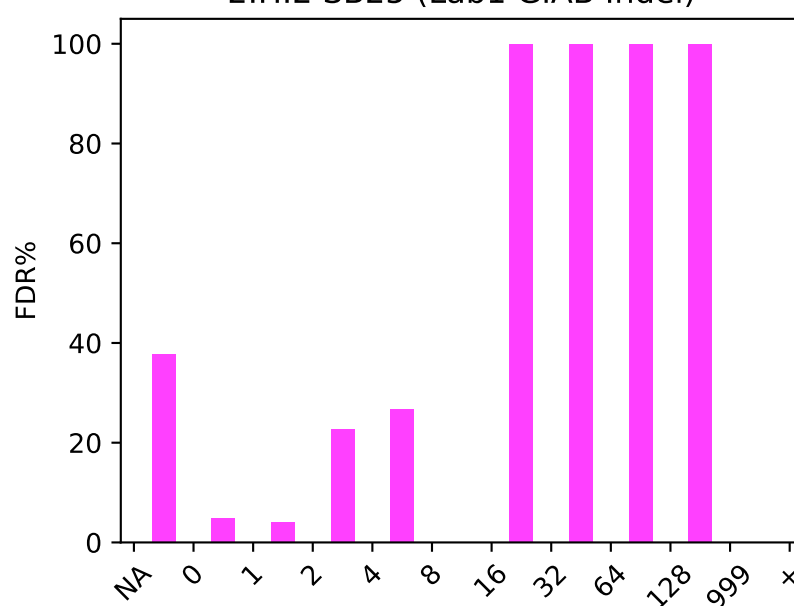

2.H.3 SB25 (Lab1 GIAB Indel)

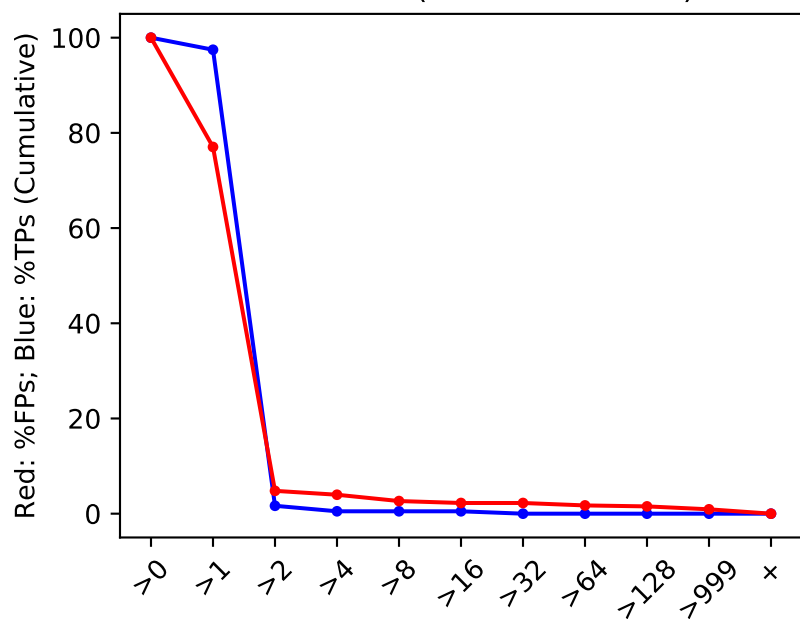

2.H.4 SB25 (Lab1 GIAB Indel)

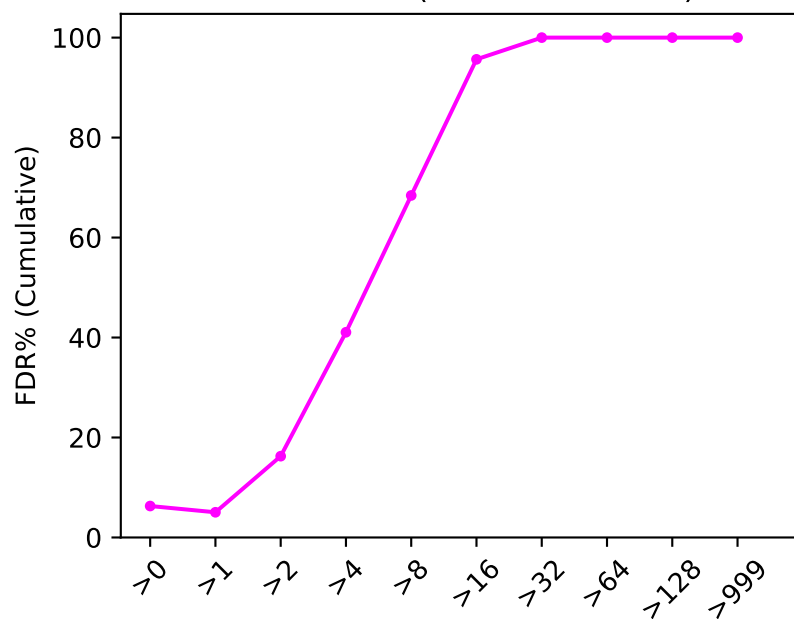

2.K.1 DP/DP ratio (Lab1 GIAB Indel)

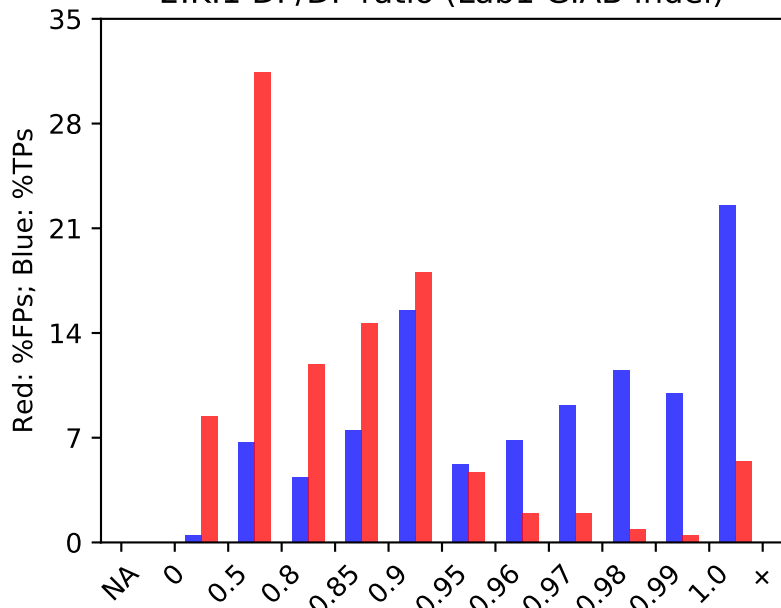

2.K.2 DP/DP ratio (Lab1 GIAB Indel)

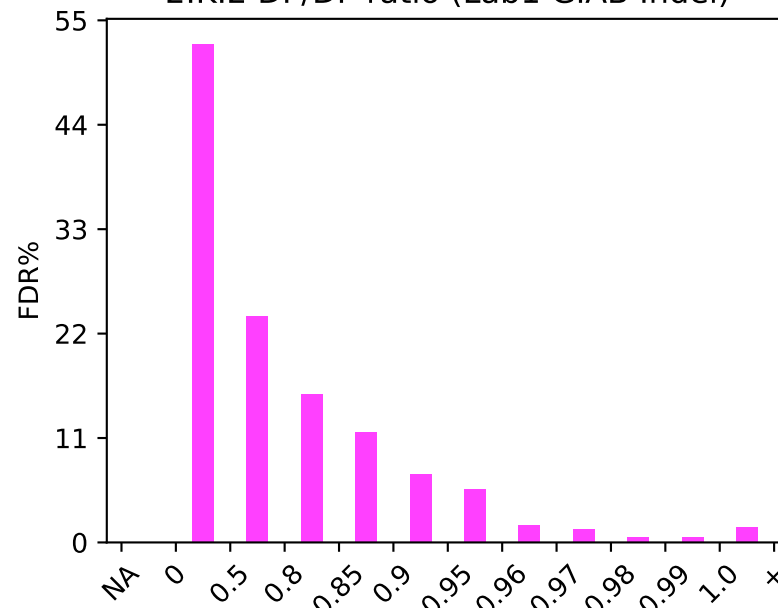

2.K.3 DP/DP ratio (Lab1 GIAB Indel)

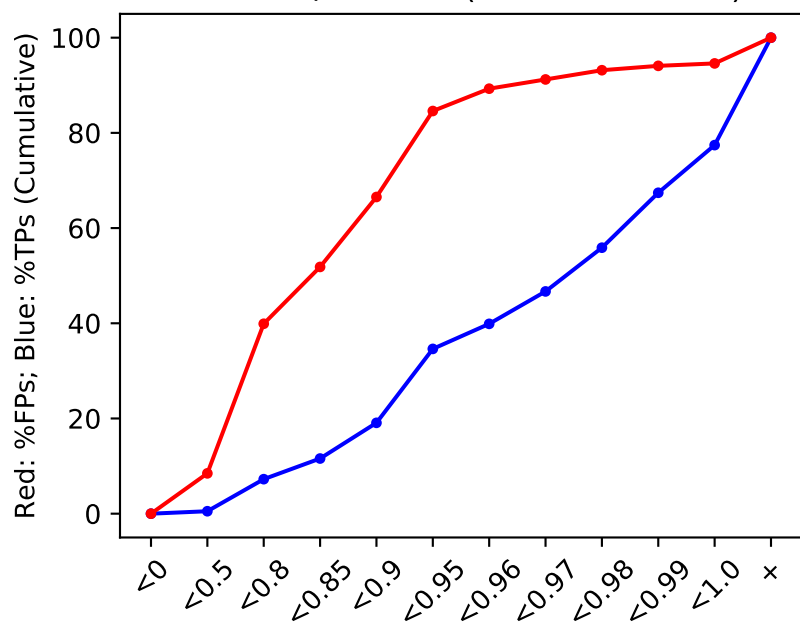

2.K.4 DP/DP ratio (Lab1 GIAB Indel)

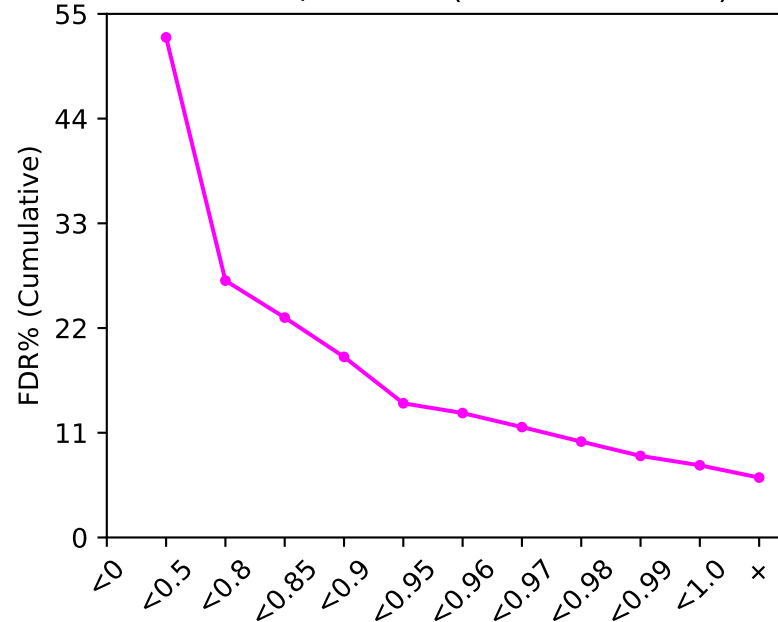

2.L.1 NEARBY-VARS (Lab1 GIAB Indel)

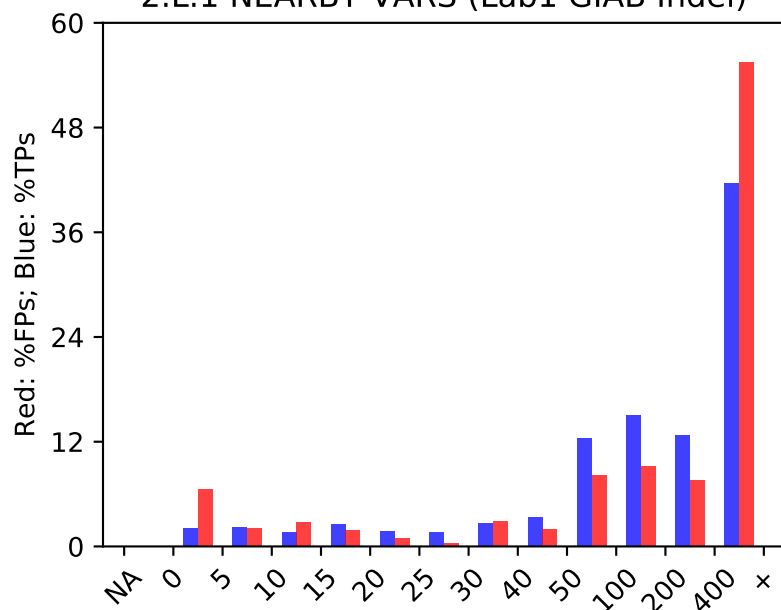

2.L.2 NEARBY-VARS (Lab1 GIAB Indel)

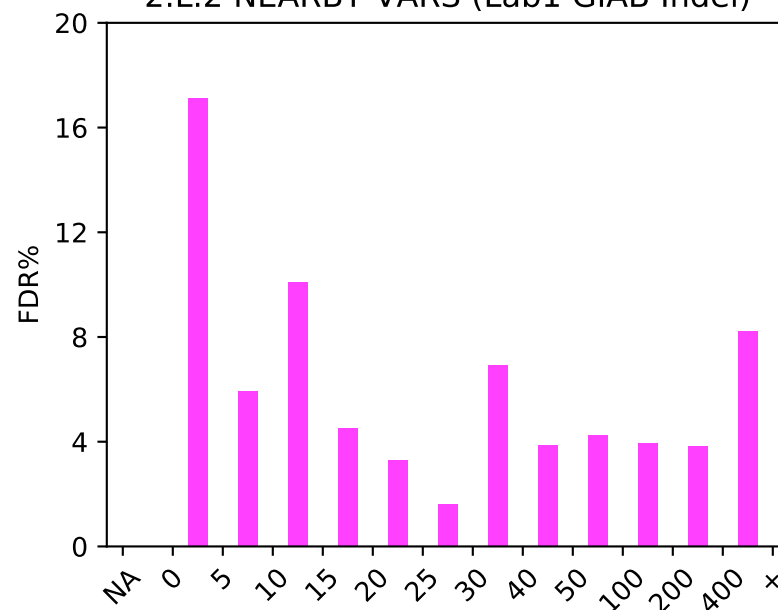

2.L.3 NEARBY-VARS (Lab1 GIAB Indel)

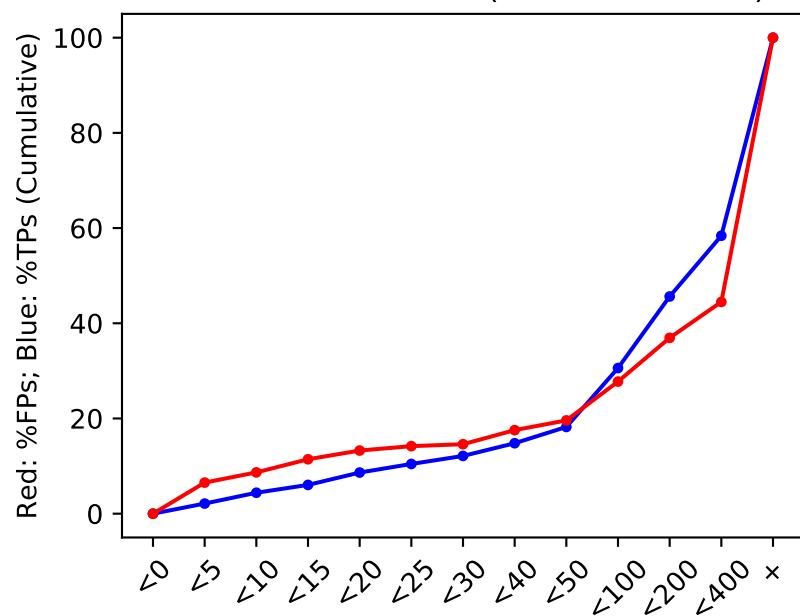

2.L.4 NEARBY-VARS (Lab1 GIAB Indel)

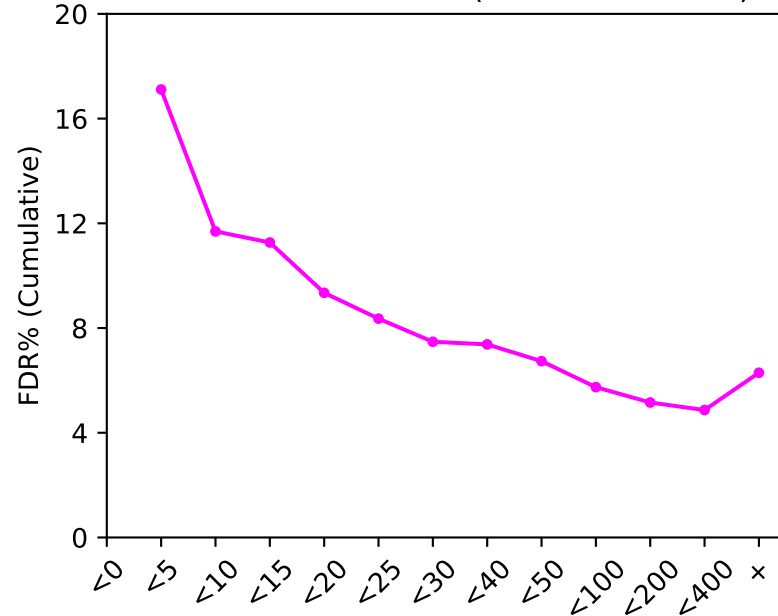

2.M.1 VAR-LEN (Lab1 GIAB Indel)

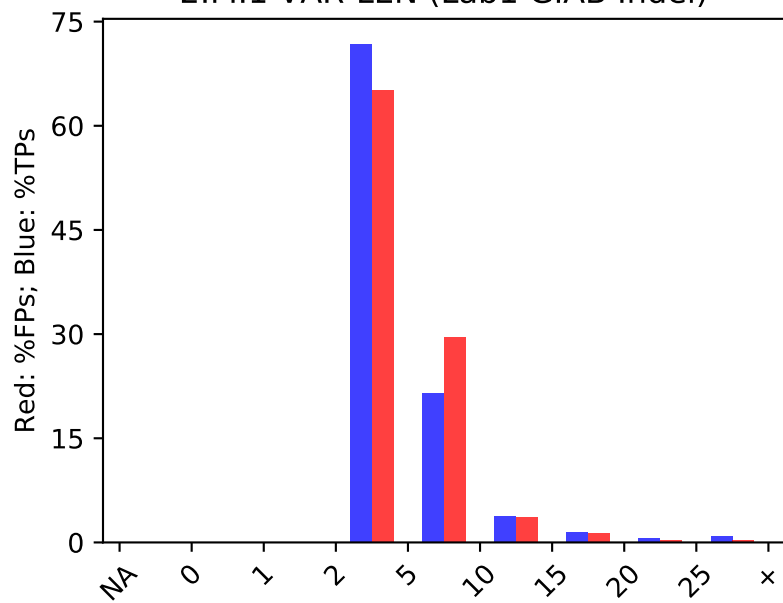

2.M.2 VAR-LEN (Lab1 GIAB Indel)

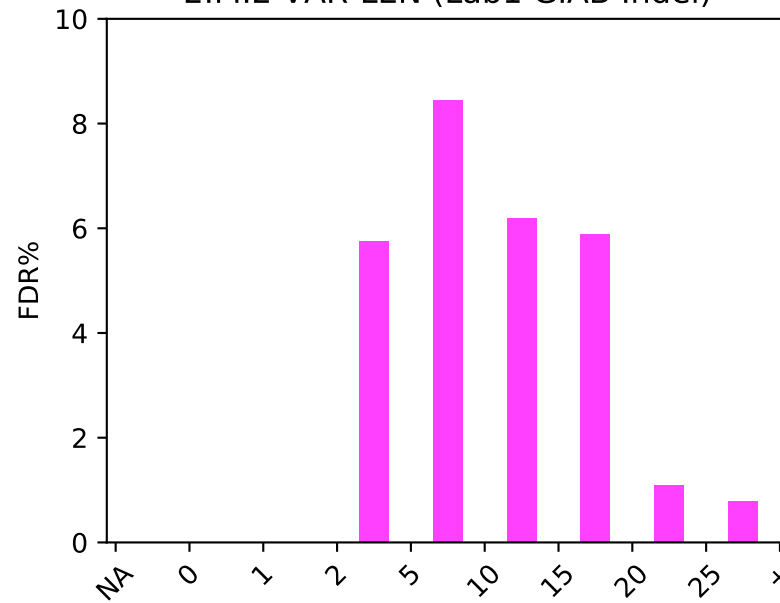

2.M.3 VAR-LEN (Lab1 GIAB Indel)

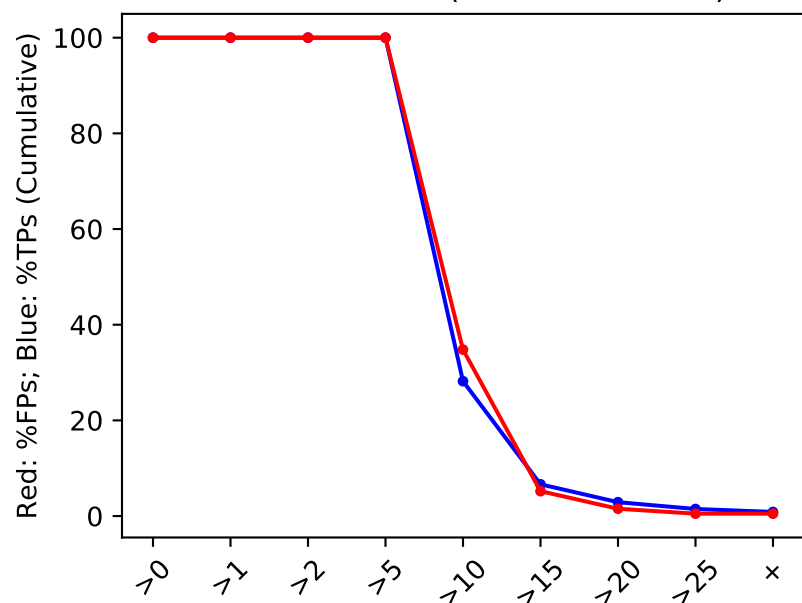

2.M.4 VAR-LEN (Lab1 GIAB Indel)

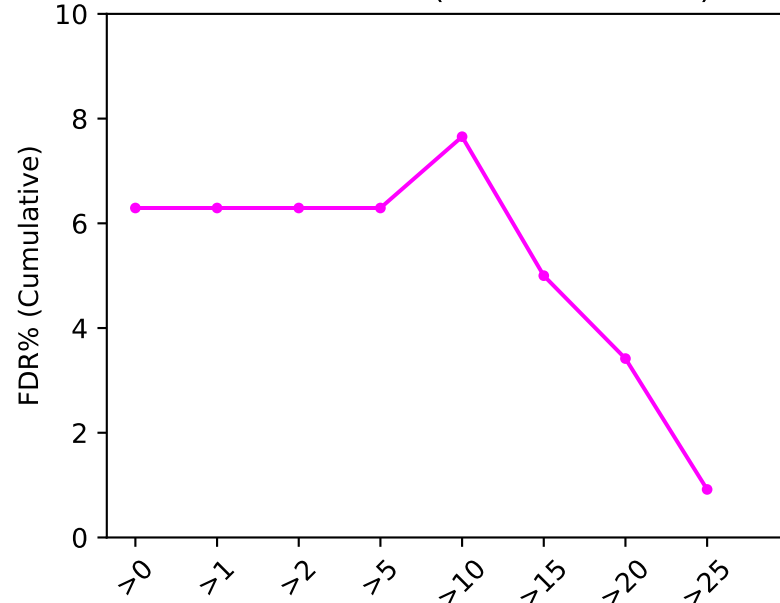

2.N.1 Binary warnings (Lab1 GIAB Indel)

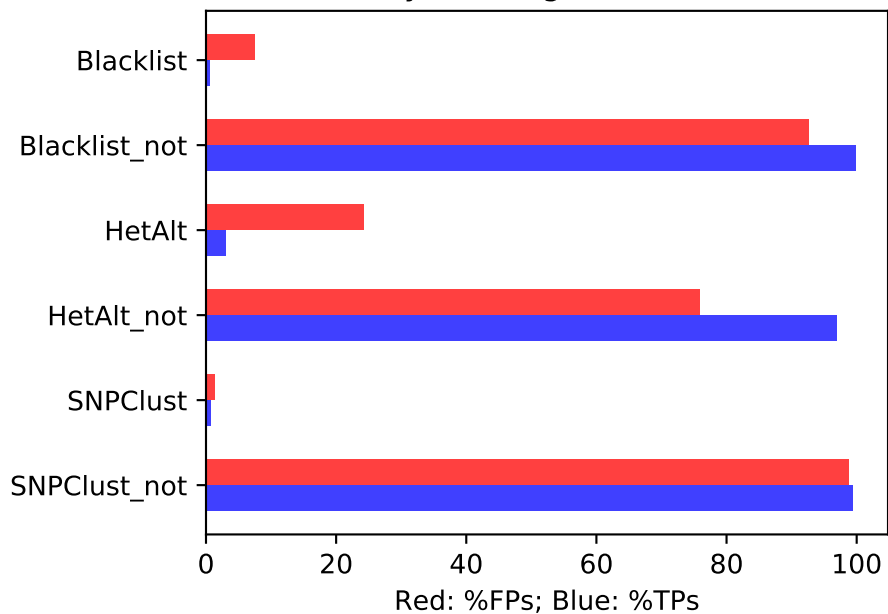

2.N.2 Binary warnings (Lab1 GIAB Indel)

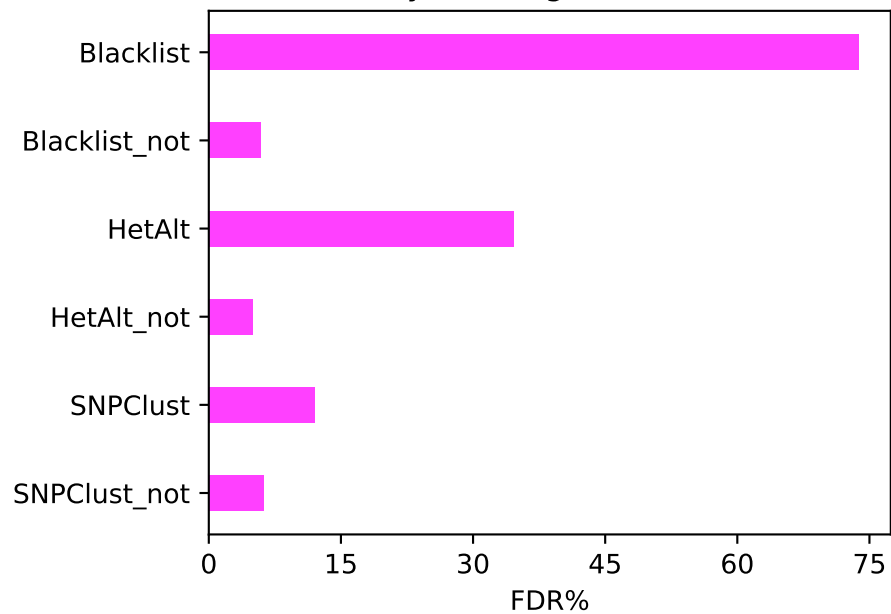

2.O.1 Genomic Context (Lab1 GIAB Indel)

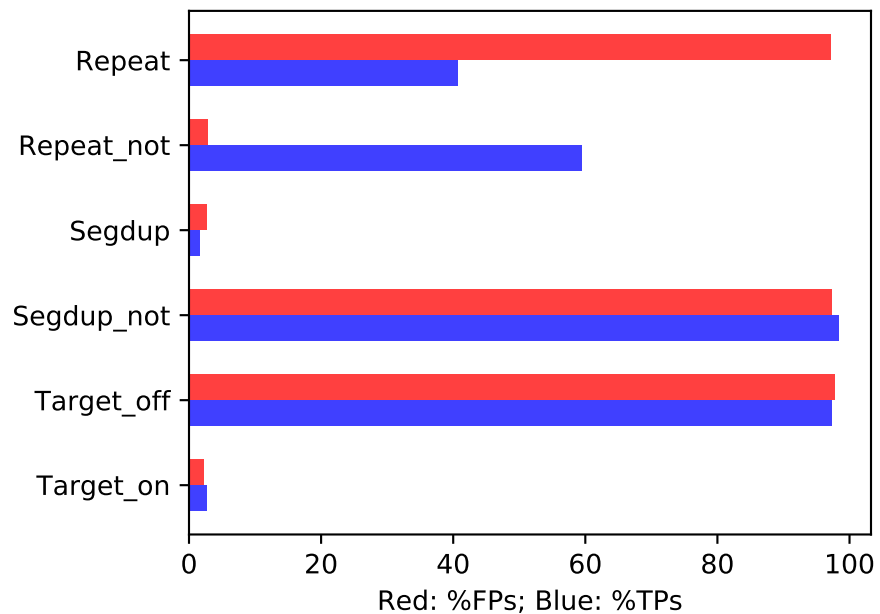

2.O.2 Genomic Context (Lab1 GIAB Indel)

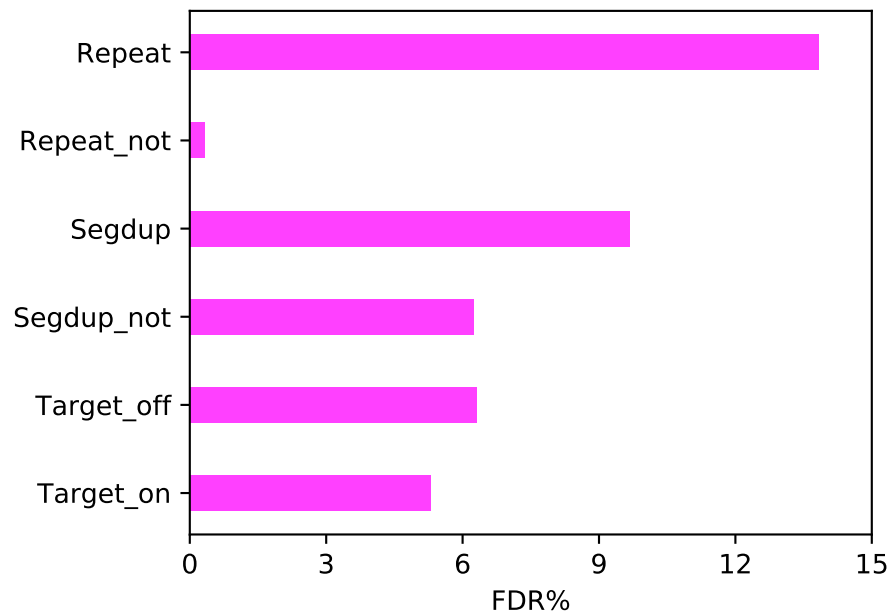

### 2.P Per-Variant FDR

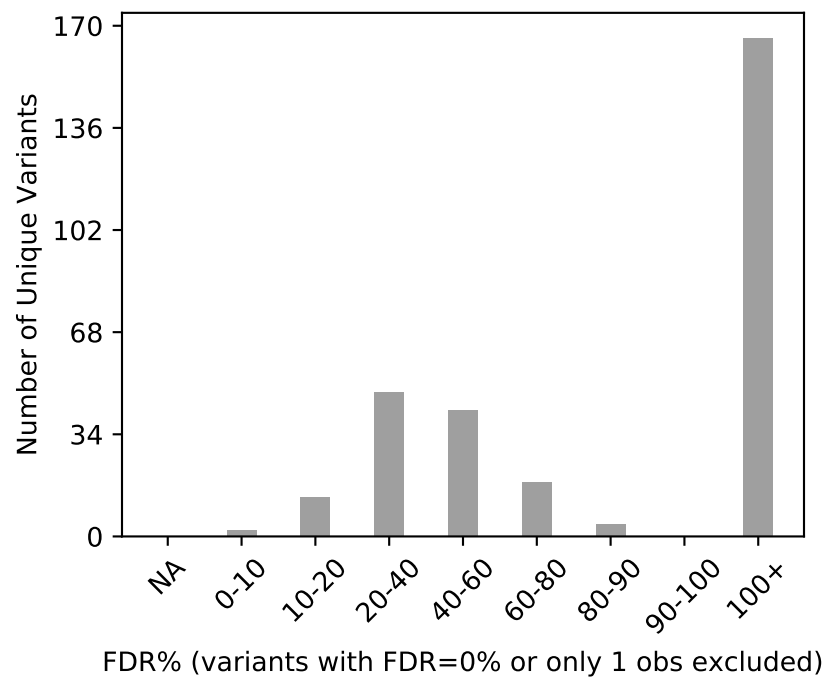

### 2.Q Published Criteria

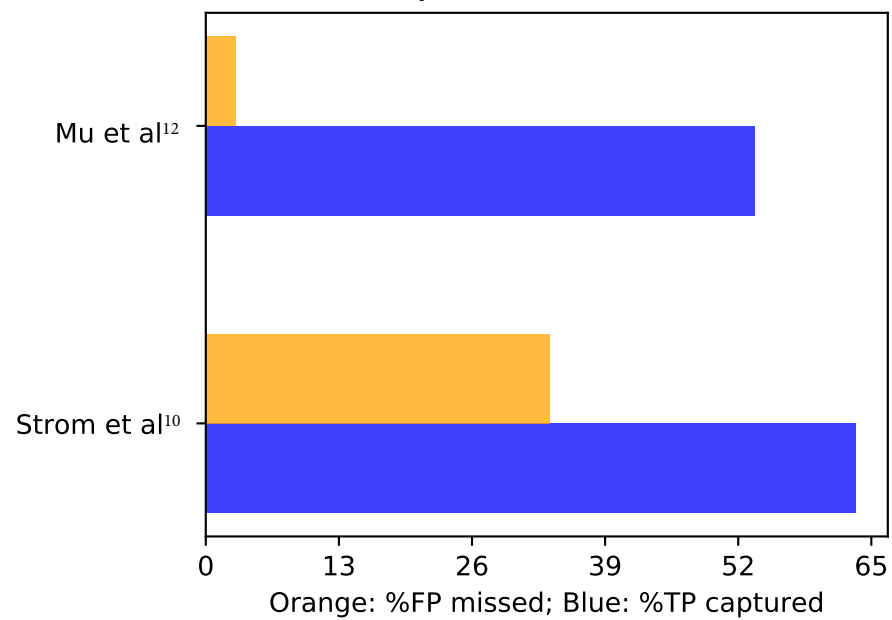

Supplement: mmc2.pdf [file mmc2.pdf]
