# Supplementary material
Source: PubMed Central journal article supplement (PMC6848948)

Supplemental Fig 3: Lab1 Patient SNVs

|                    |      |       |
|--------------------|------|-------|
| TP Variant Calls   | 3689 | 99.7% |
| FP Variant Calls   | 10   | 0.27% |
| Unique Variants    | 2840 |       |
| Unique FP Variants | 7    |       |

3.A.1 INFO\_DP (Lab1 Patient SNVs)

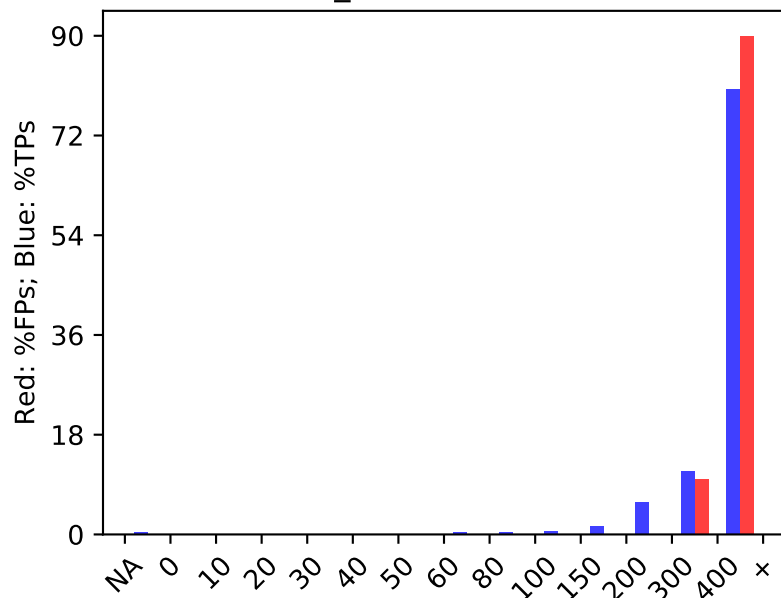

3.A.2 INFO\_DP (Lab1 Patient SNVs)

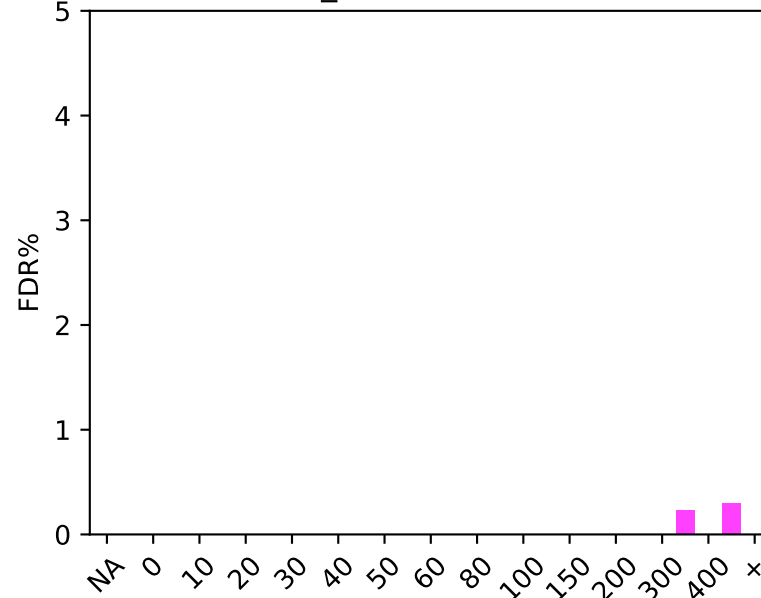

3.A.3 INFO\_DP (Lab1 Patient SNVs)

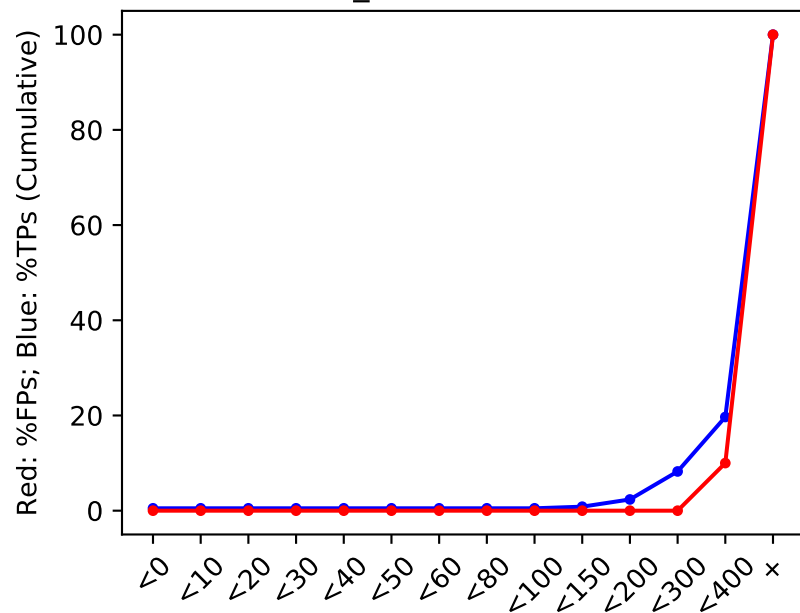

3.A.4 INFO\_DP (Lab1 Patient SNVs)

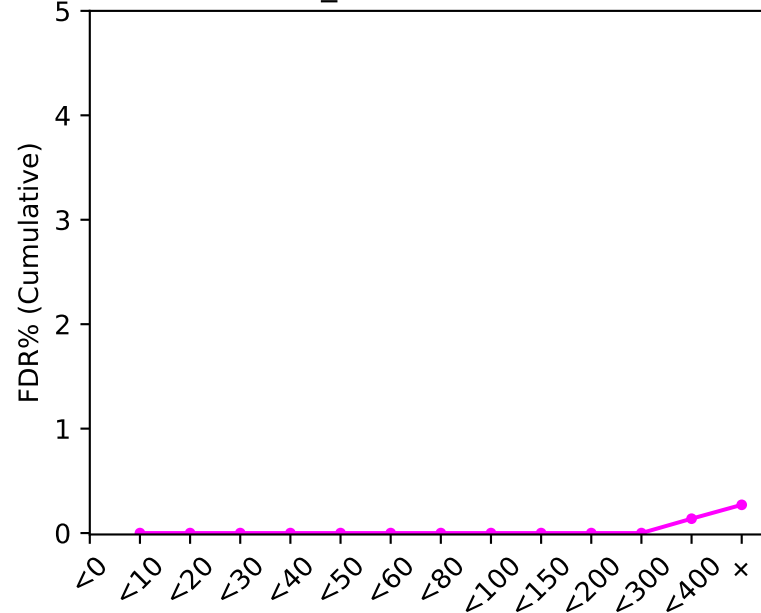

3.B.1 GT\_DP (Lab1 Patient SNVs)

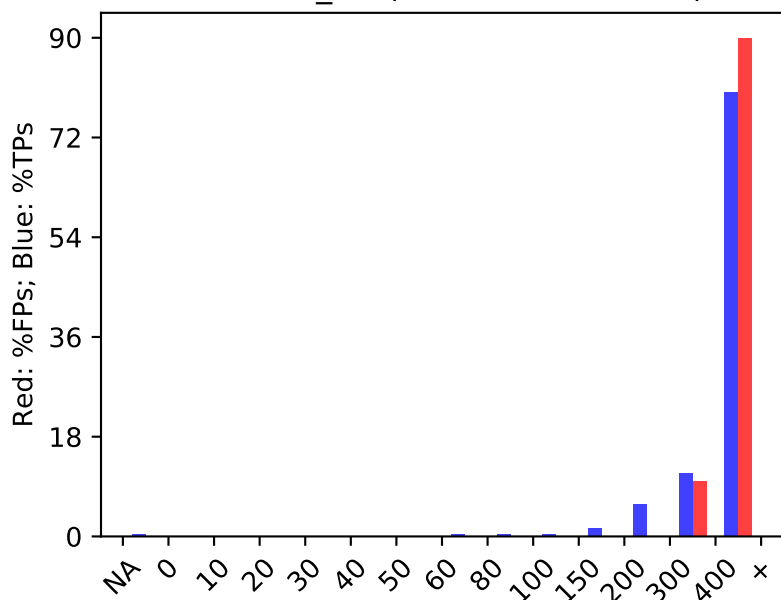

3.B.2 GT\_DP (Lab1 Patient SNVs)

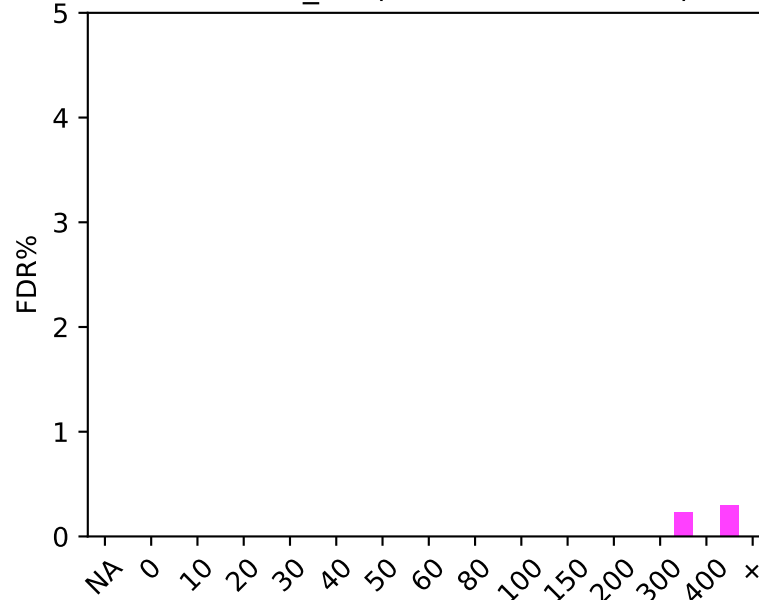

3.B.3 GT\_DP (Lab1 Patient SNVs)

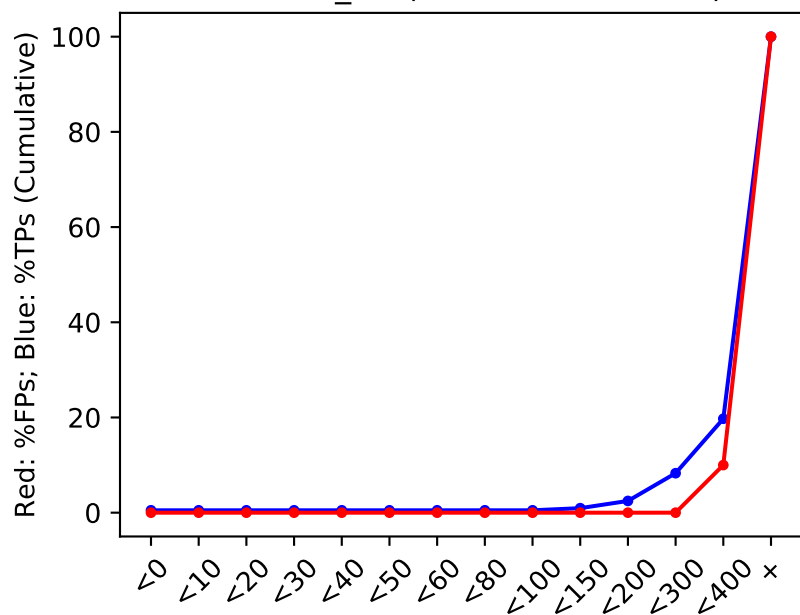

3.B.4 GT\_DP (Lab1 Patient SNVs)

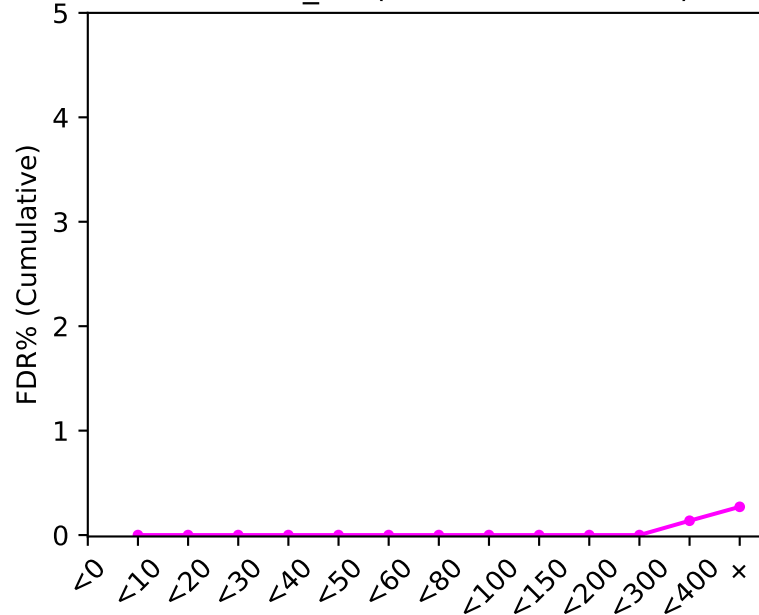

3.C.1 ABnorm (Lab1 Patient SNVs)

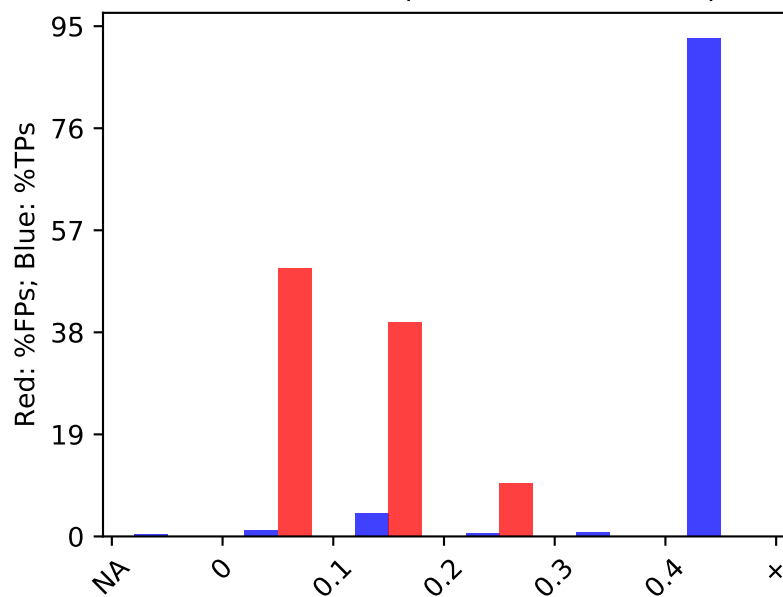

3.C.2 ABnorm (Lab1 Patient SNVs)

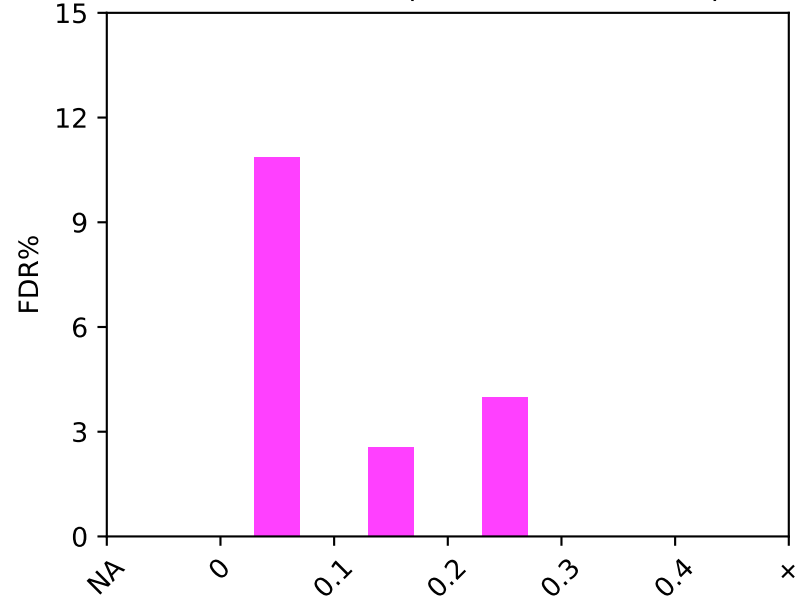

3.C.3 ABnorm (Lab1 Patient SNVs)

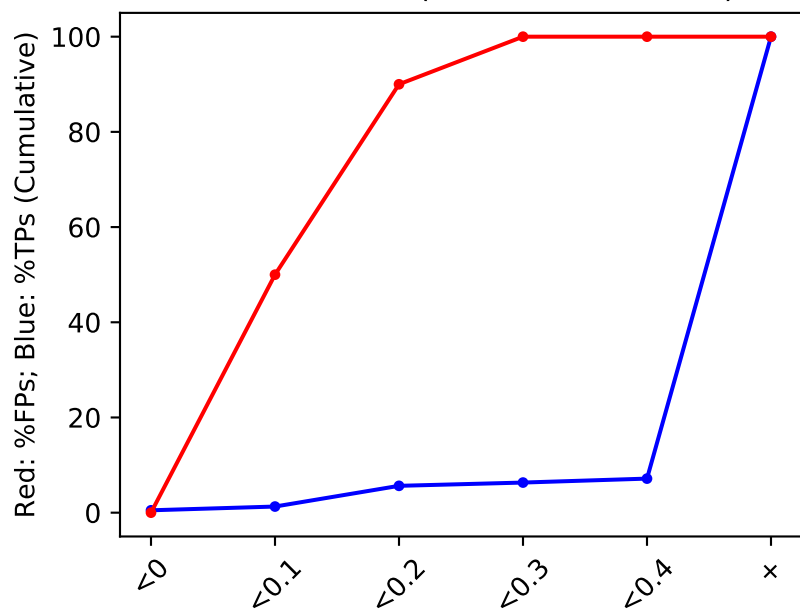

3.C.4 ABnorm (Lab1 Patient SNVs)

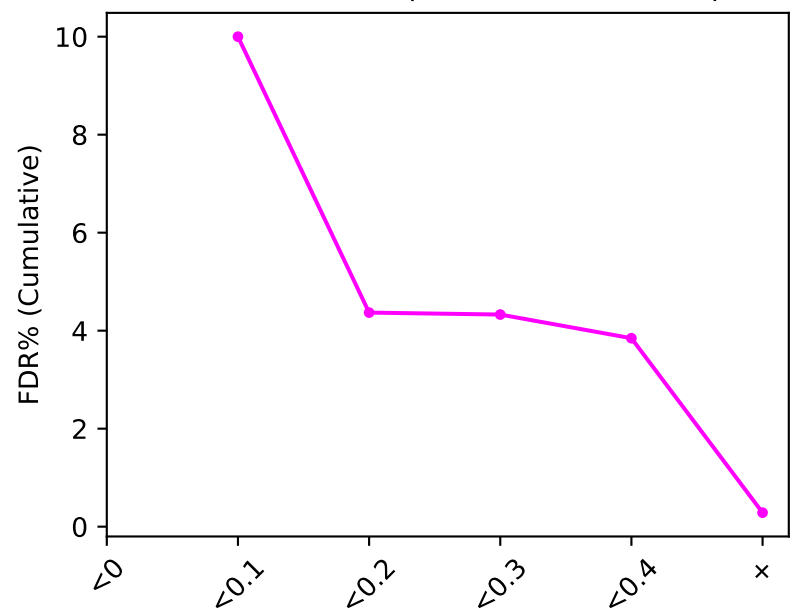

3.D.1 ABhom (Lab1 Patient SNVs)

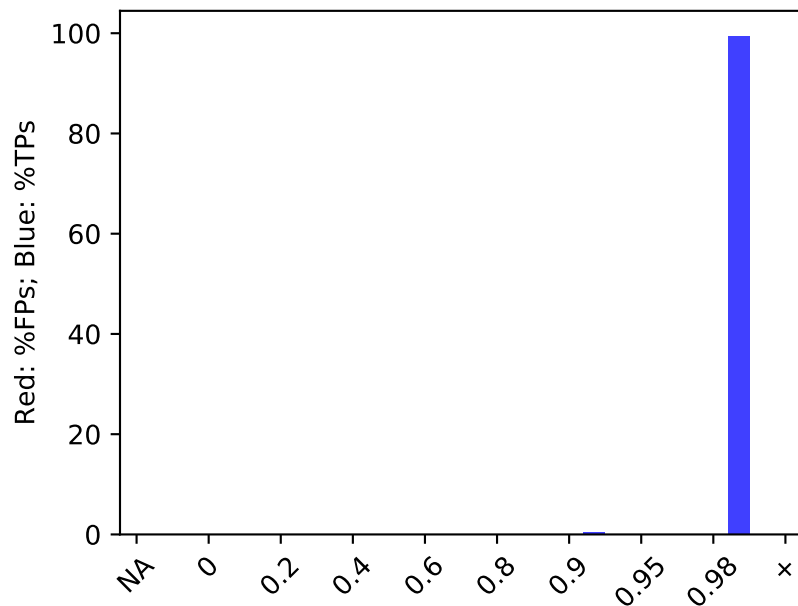

3.D.2 ABhom (Lab1 Patient SNVs)

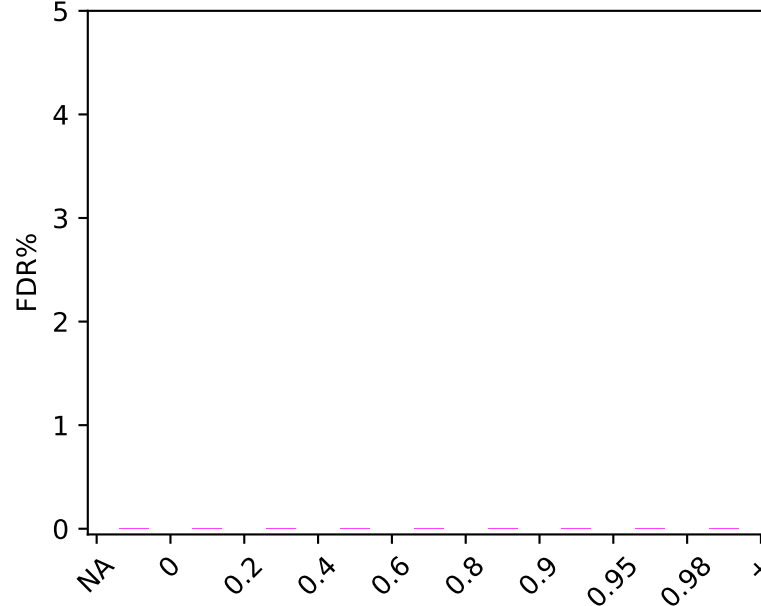

3.D.3 ABhom (Lab1 Patient SNVs)

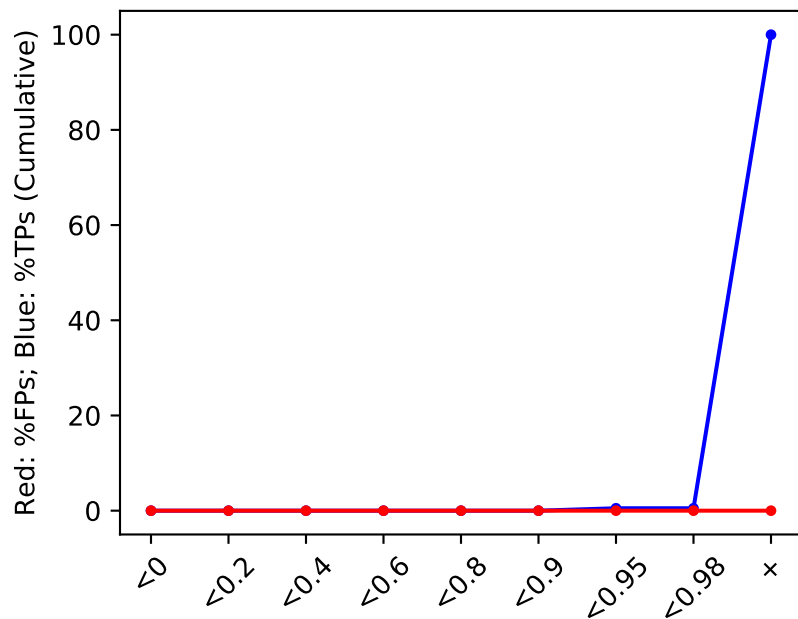

3.D.4 ABhom (Lab1 Patient SNVs)

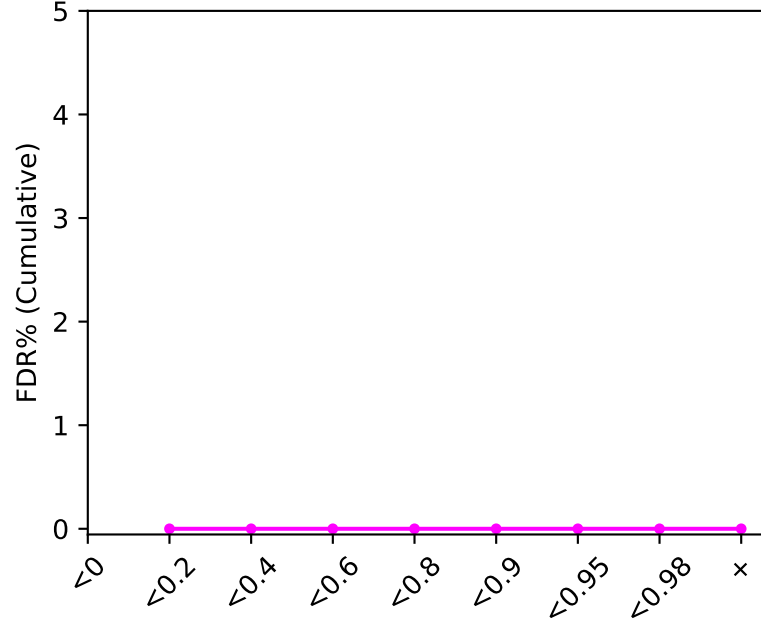

3.E.1 QUAL (Lab1 Patient SNVs)

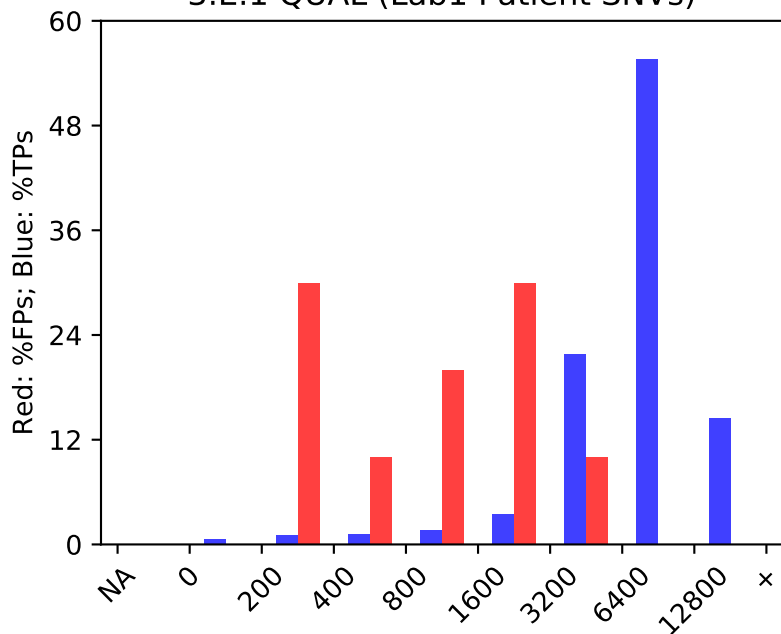

3.E.2 QUAL (Lab1 Patient SNVs)

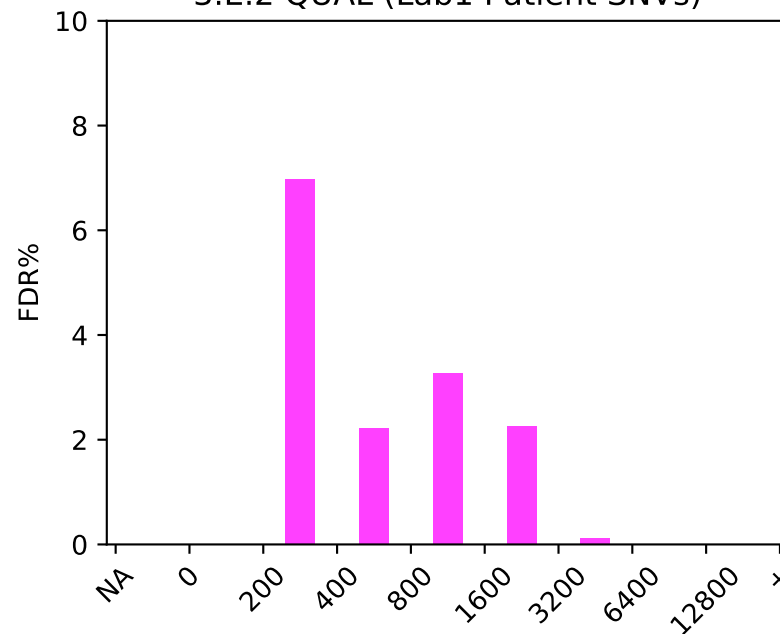

3.E.3 QUAL (Lab1 Patient SNVs)

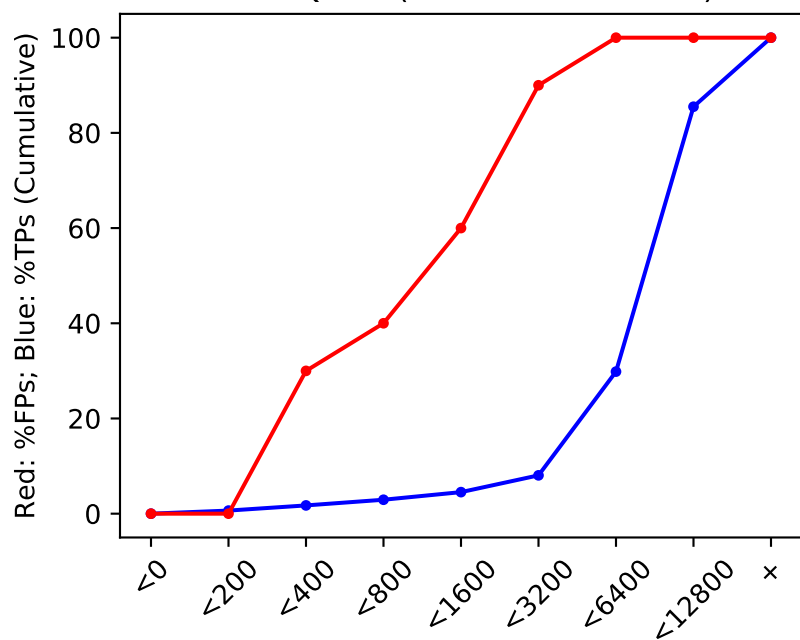

3.E.4 QUAL (Lab1 Patient SNVs)

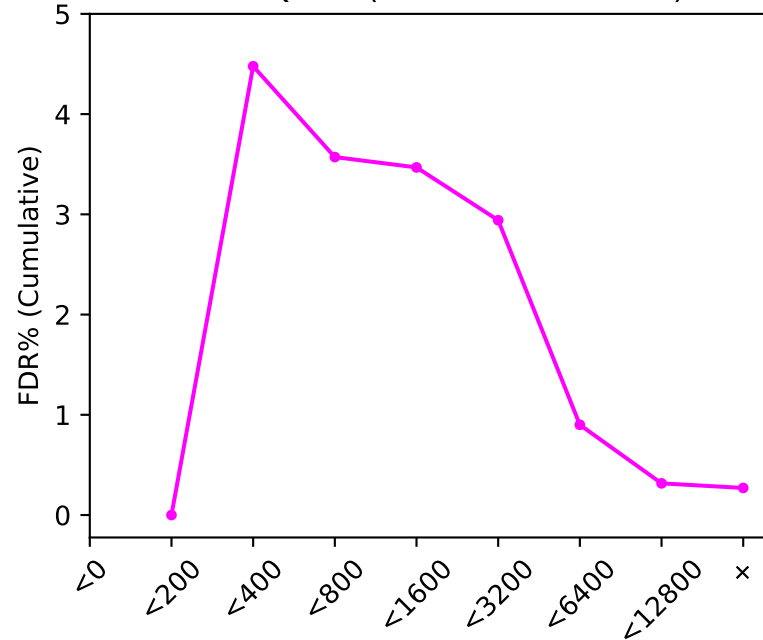

3.F.1 QD (Lab1 Patient SNVs)

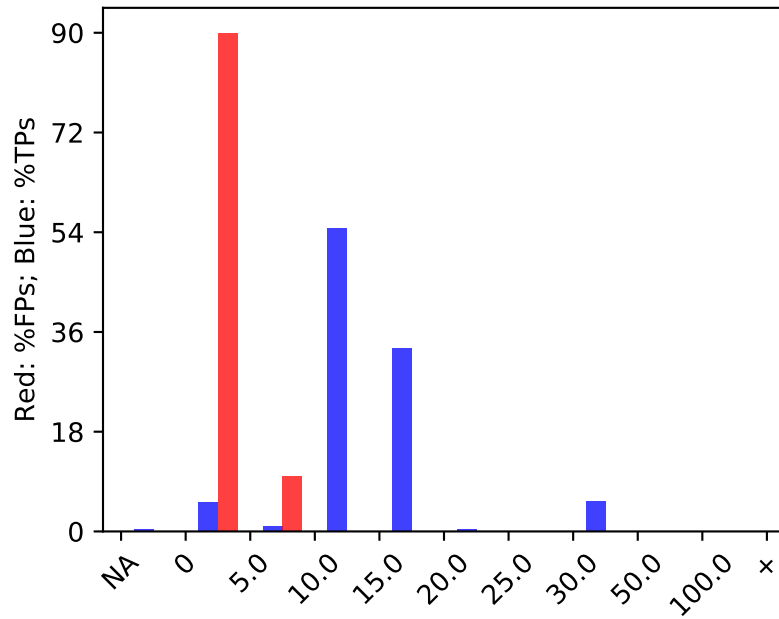

3.F.2 QD (Lab1 Patient SNVs)

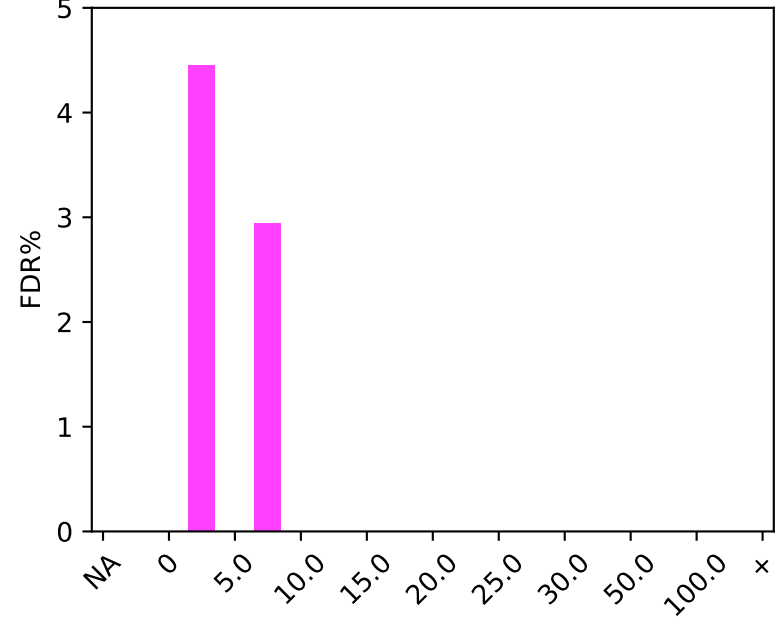

3.F.3 QD (Lab1 Patient SNVs)

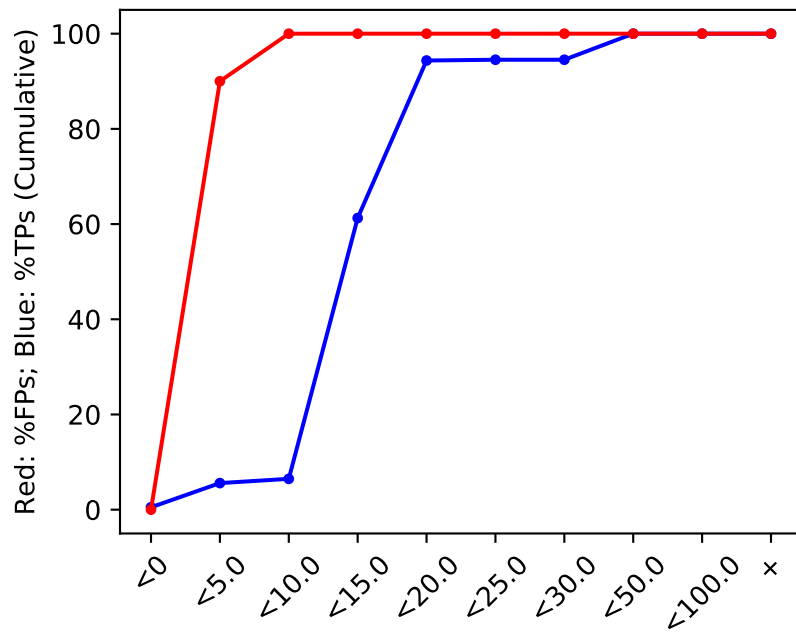

3.F.4 QD (Lab1 Patient SNVs)

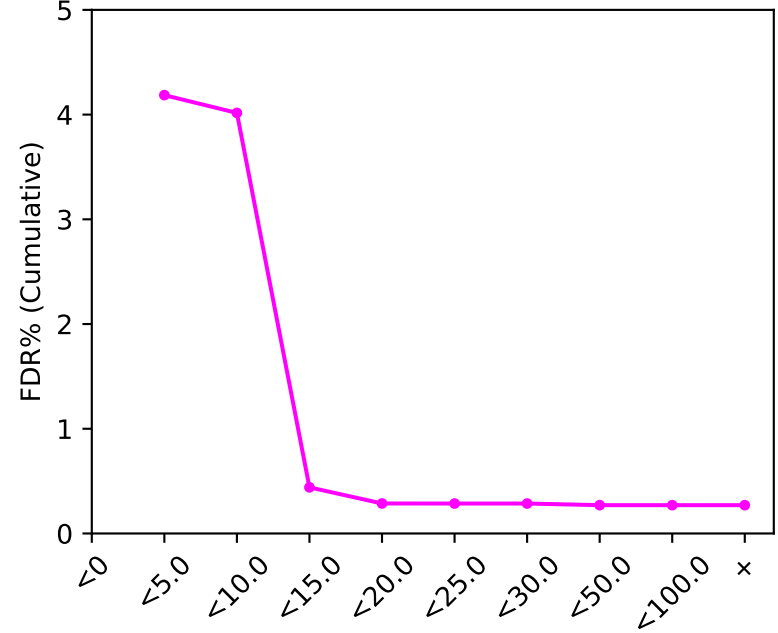

3.G.1 SB5 (Lab1 Patient SNVs)

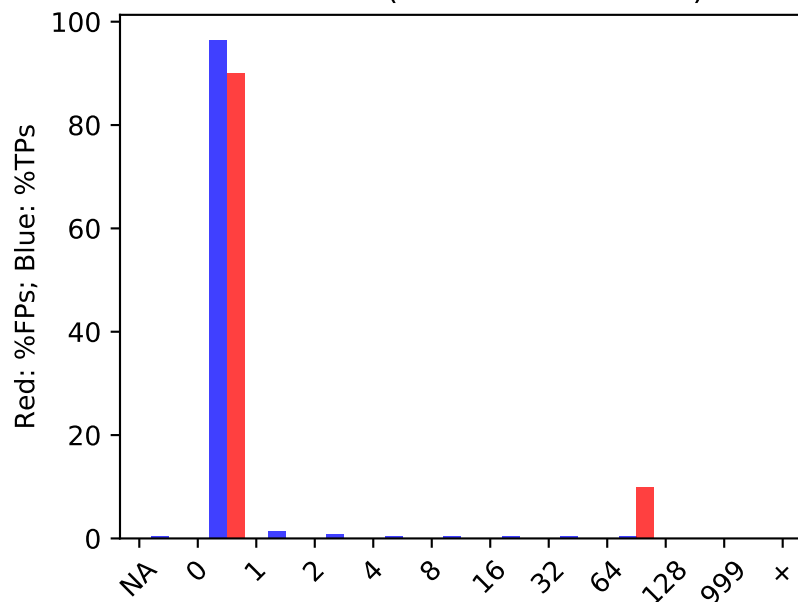

3.G.2 SB5 (Lab1 Patient SNVs)

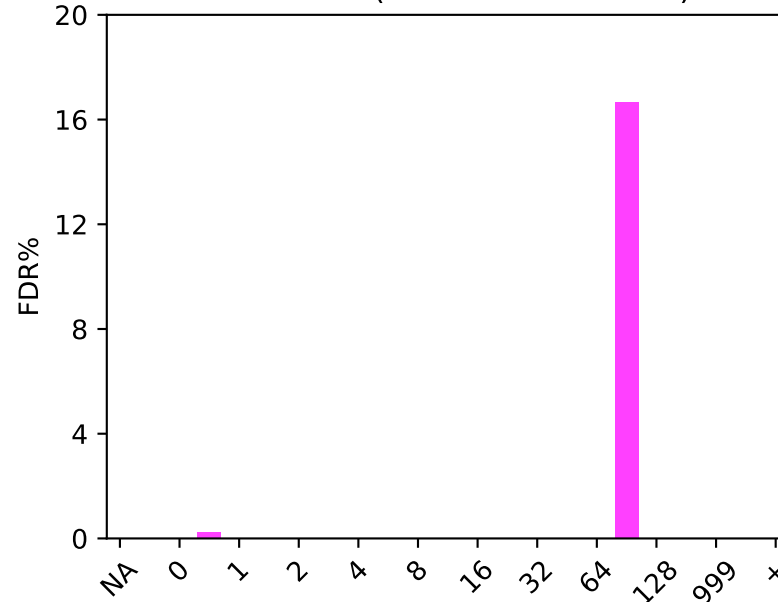

3.G.3 SB5 (Lab1 Patient SNVs)

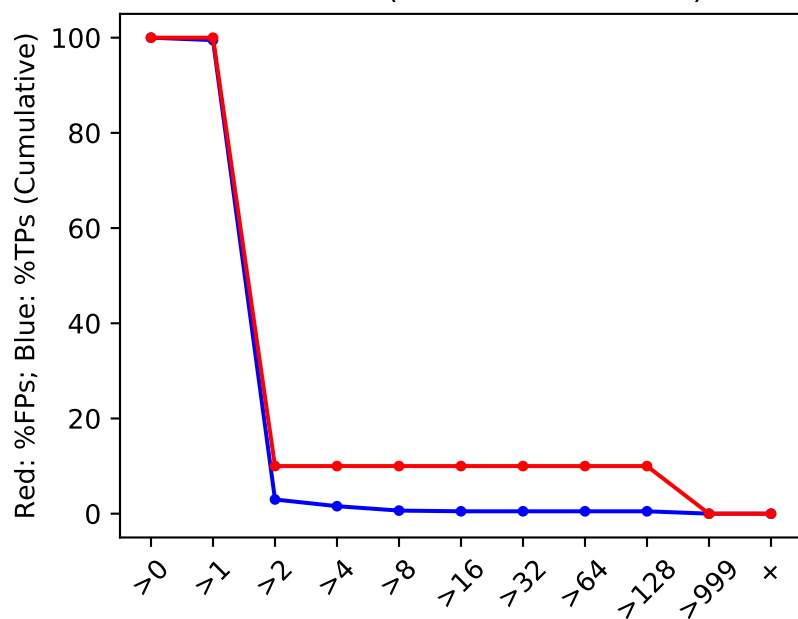

3.G.4 SB5 (Lab1 Patient SNVs)

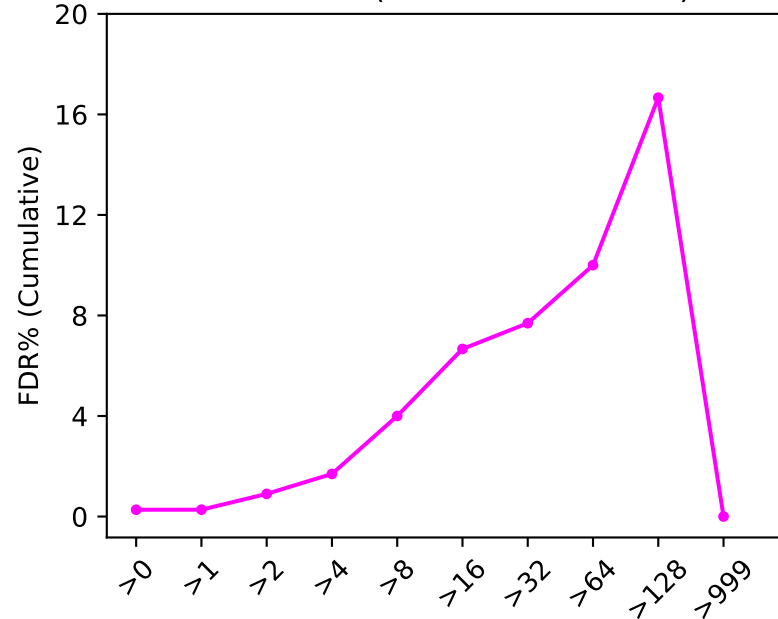



3.H.1 SB25 (Lab1 Patient SNVs)

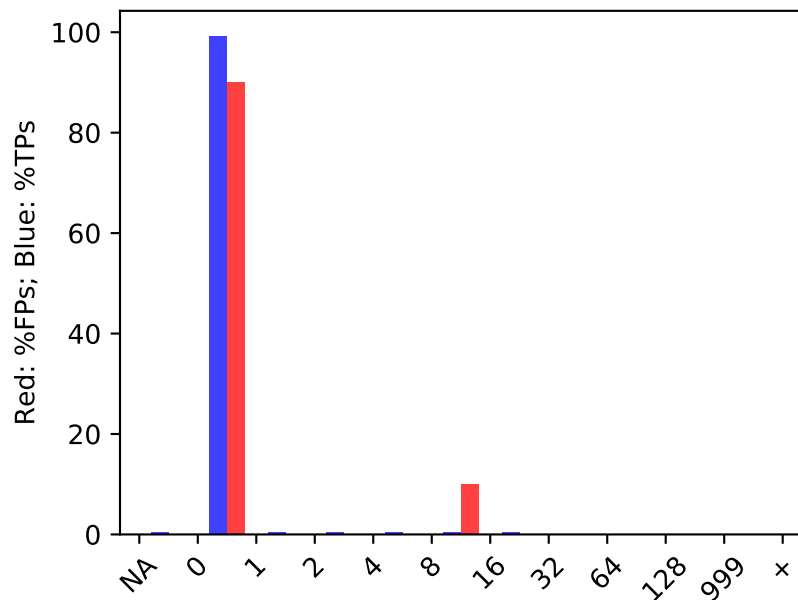

3.H.2 SB25 (Lab1 Patient SNVs)

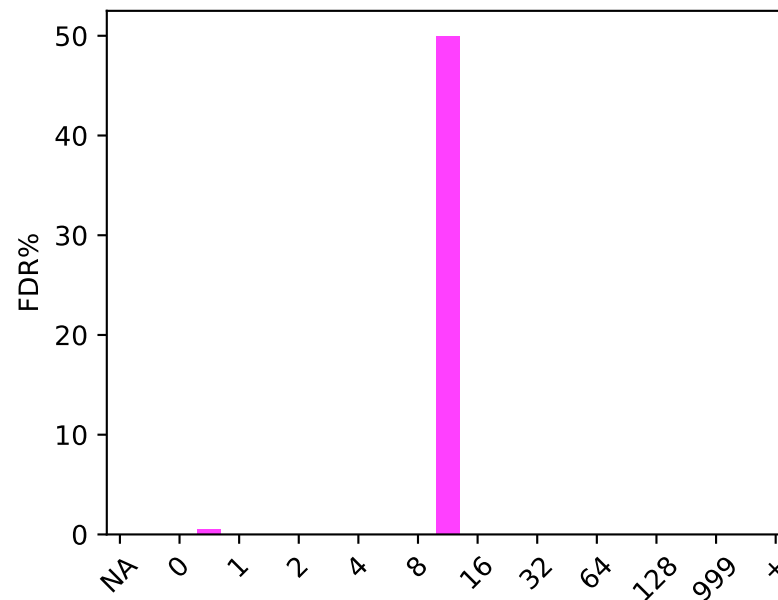

3.H.3 SB25 (Lab1 Patient SNVs)

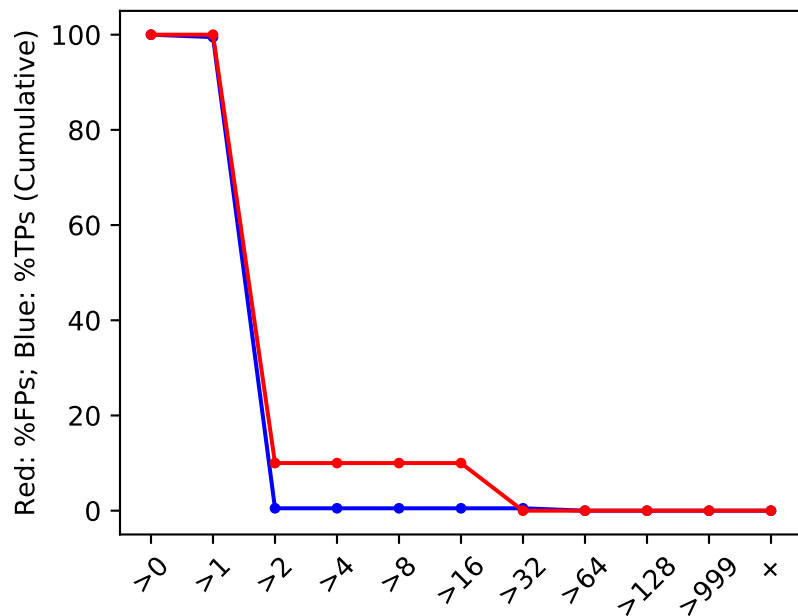

3.H.4 SB25 (Lab1 Patient SNVs)

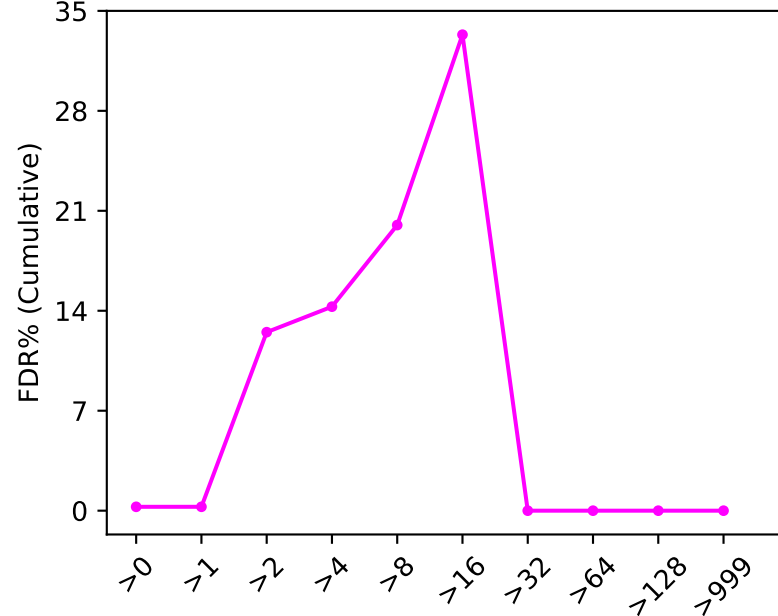

3.K.1 DP/DP ratio (Lab1 Patient SNVs)

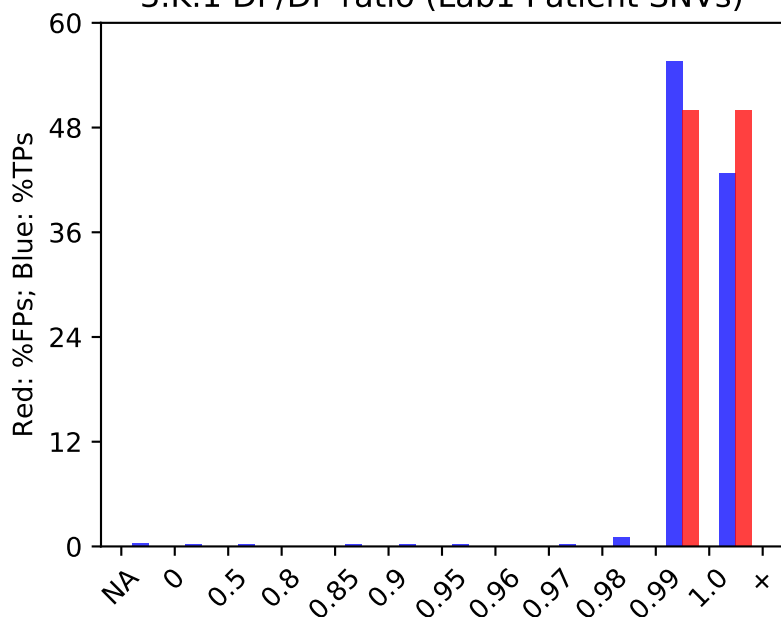

3.K.2 DP/DP ratio (Lab1 Patient SNVs)

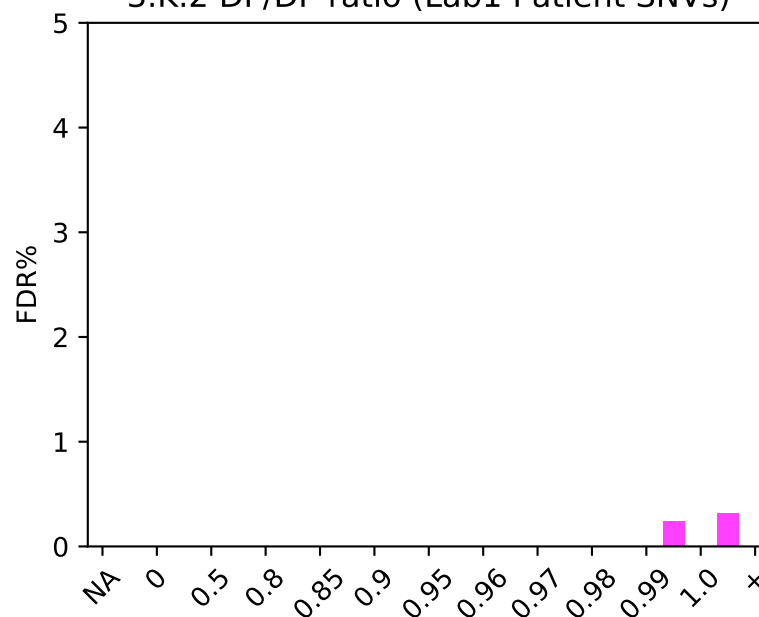

3.K.3 DP/DP ratio (Lab1 Patient SNVs)

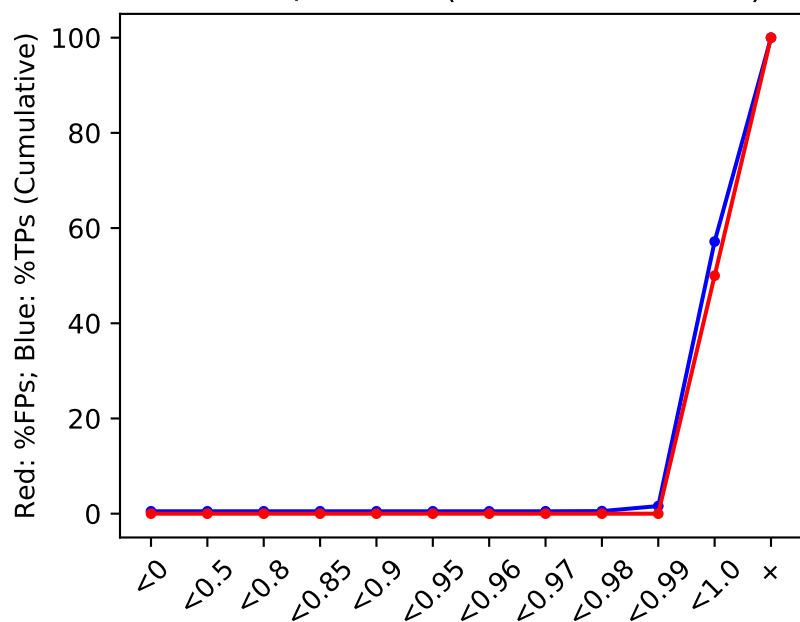

3.K.4 DP/DP ratio (Lab1 Patient SNVs)

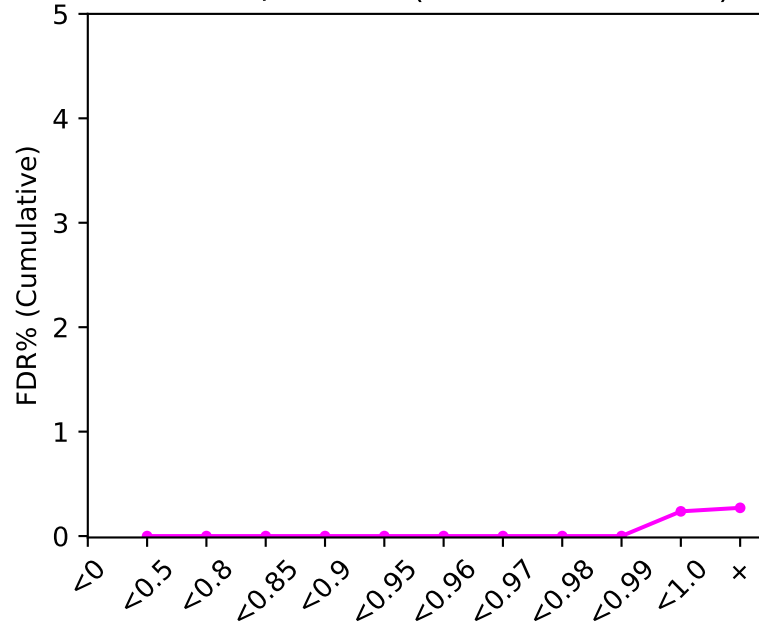

3.N.1 Binary warnings (Lab1 Patient SNVs)

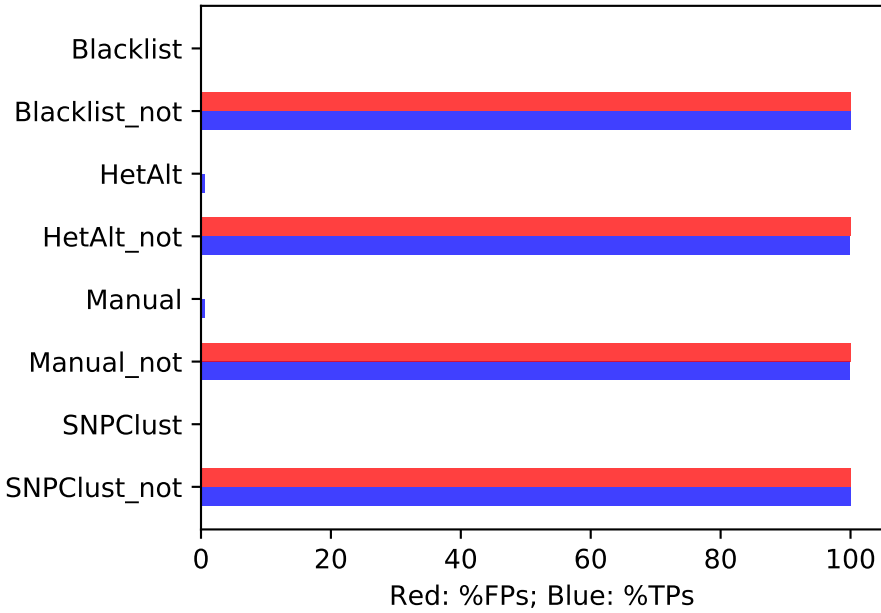

3.N.2 Binary warnings (Lab1 Patient SNVs)

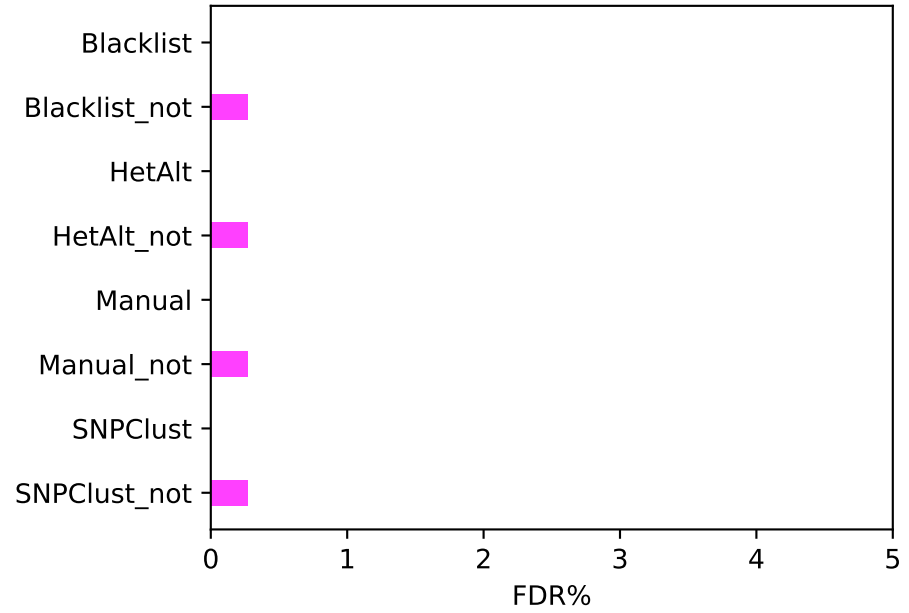

3.O.1 Genomic Context (Lab1 Patient SNVs)

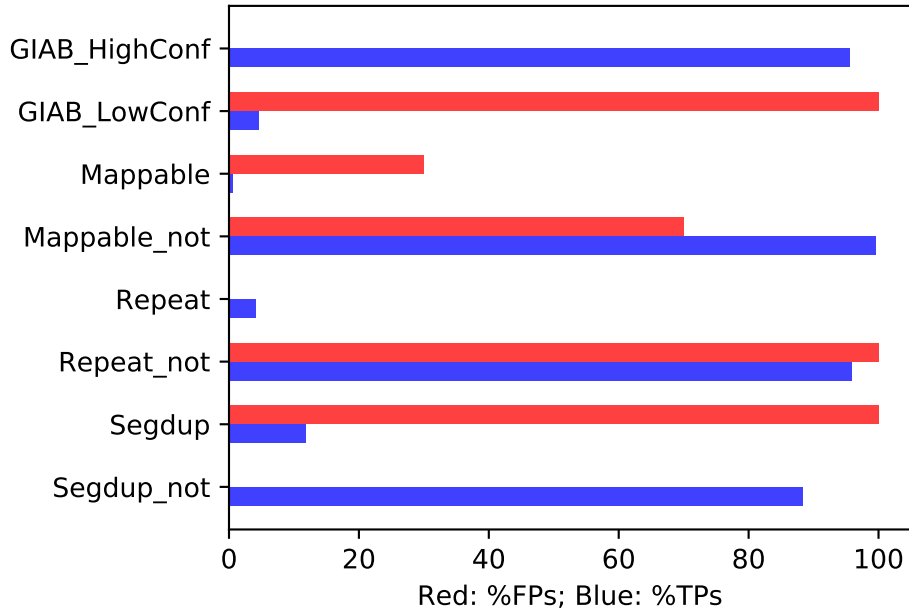

3.O.2 Genomic Context (Lab1 Patient SNVs)

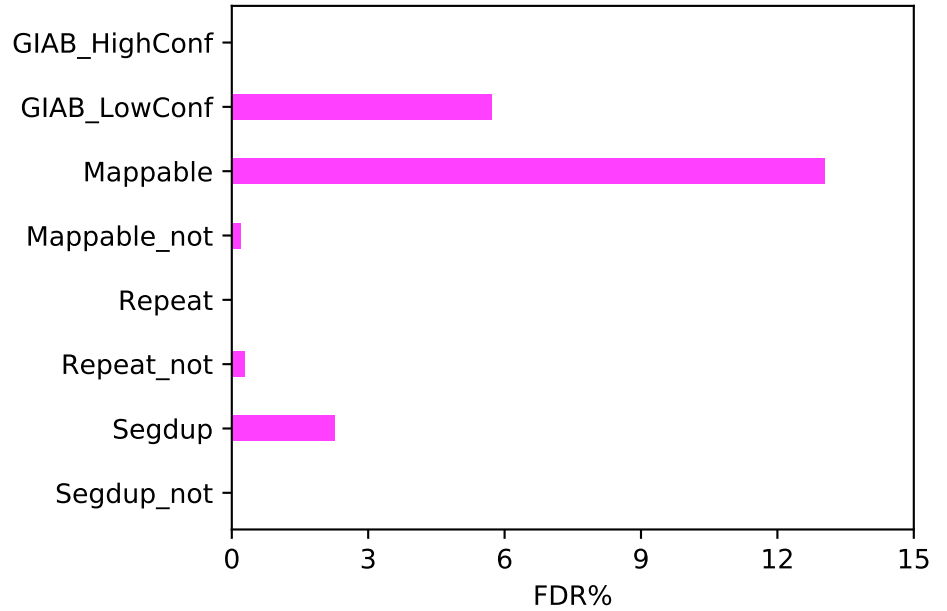

### 3.P Per-Variant FDR

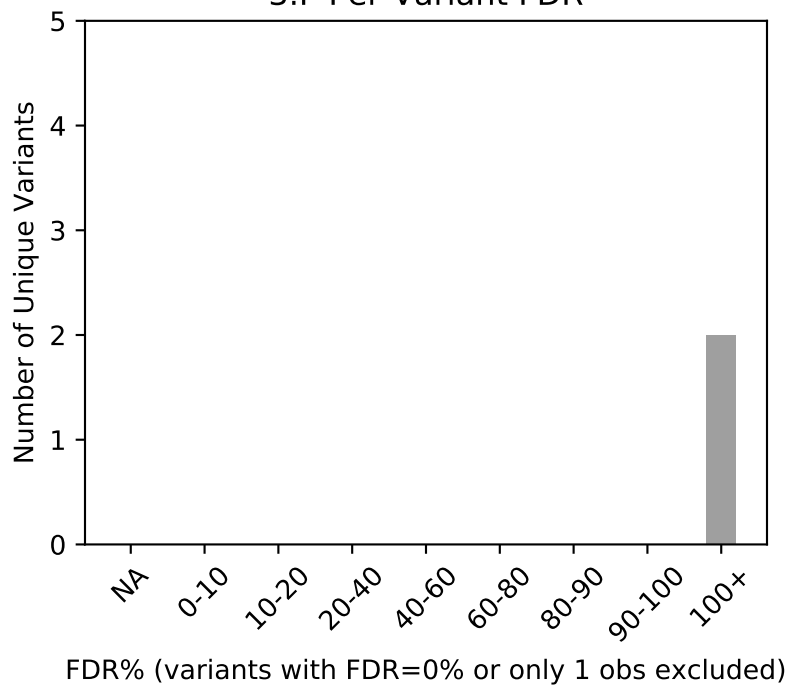

### 3.Q Published Criteria

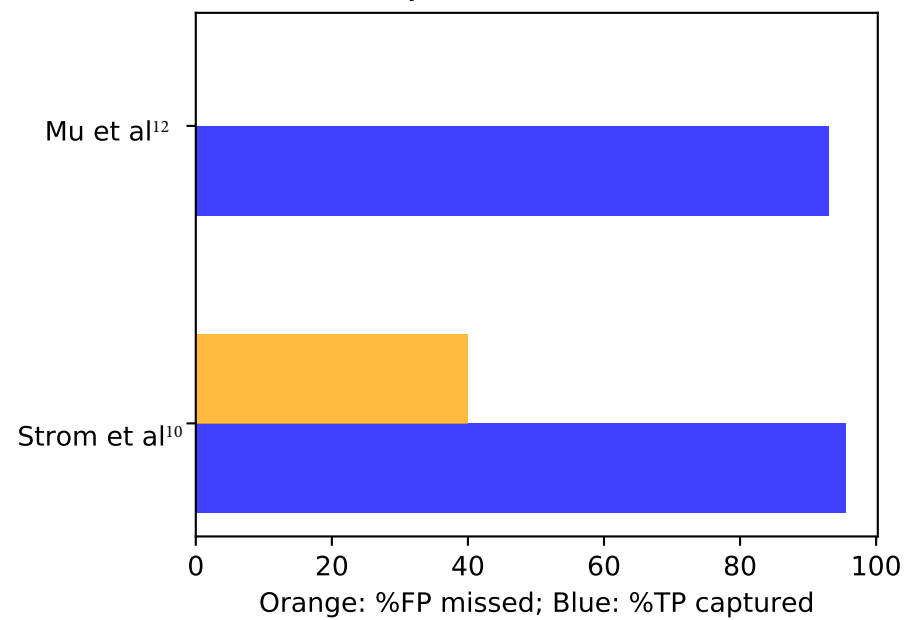

Supplement: mmc3.pdf [file mmc3.pdf]
