# Supplementary material
Source: PubMed Central journal article supplement (PMC6848948)

Supplemental Fig 4: Lab1 Patient Indel

|                    |      |       |
|--------------------|------|-------|
| TP Variant Calls   | 2262 | 99.5% |
| FP Variant Calls   | 12   | 0.53% |
| Unique Variants    | 1749 |       |
| Unique FP Variants | 11   |       |

4.A.1 INFO\_DP (Lab1 Patient Indel)

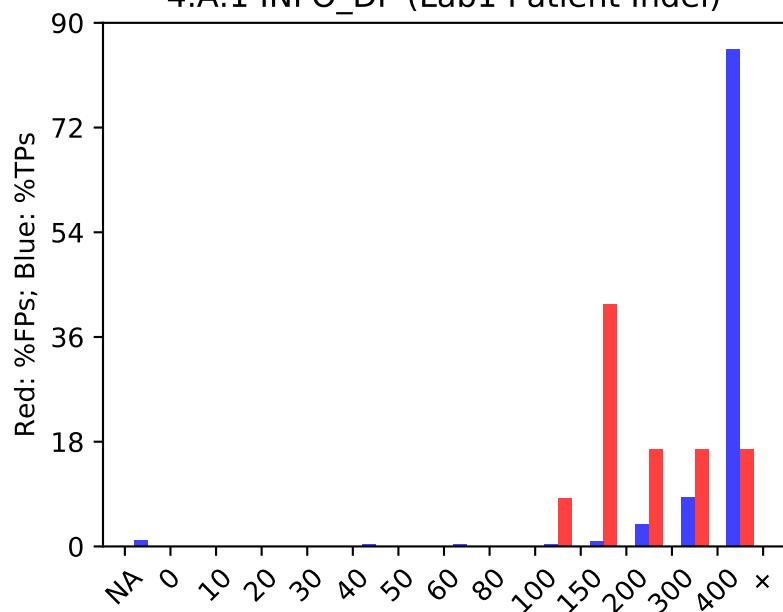

4.A.2 INFO\_DP (Lab1 Patient Indel)

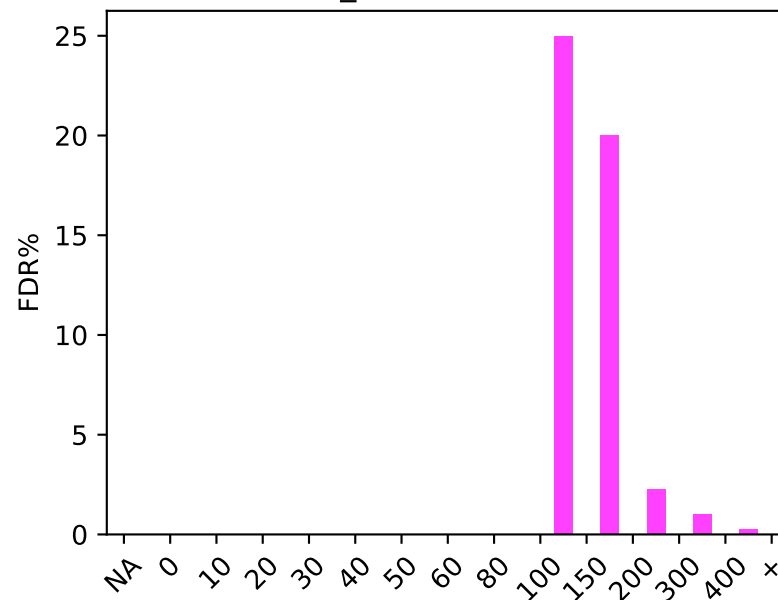

4.A.3 INFO\_DP (Lab1 Patient Indel)

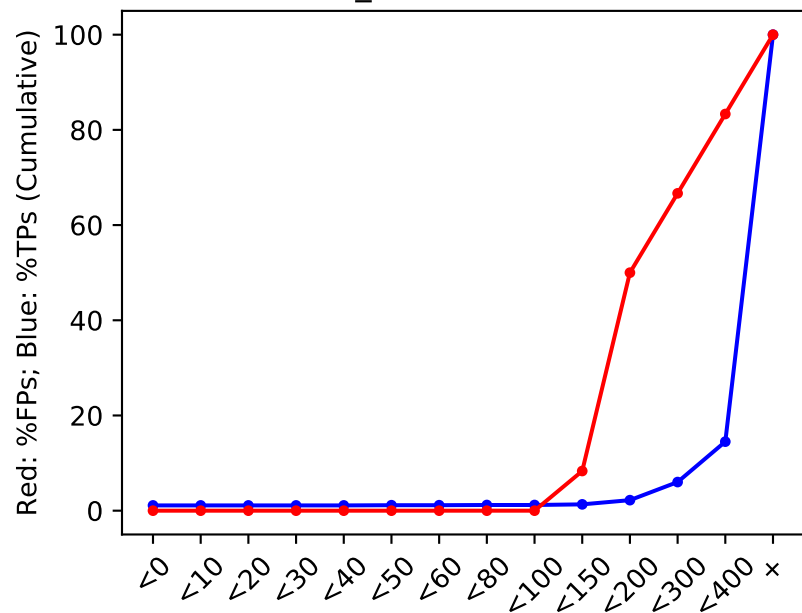

4.A.4 INFO\_DP (Lab1 Patient Indel)

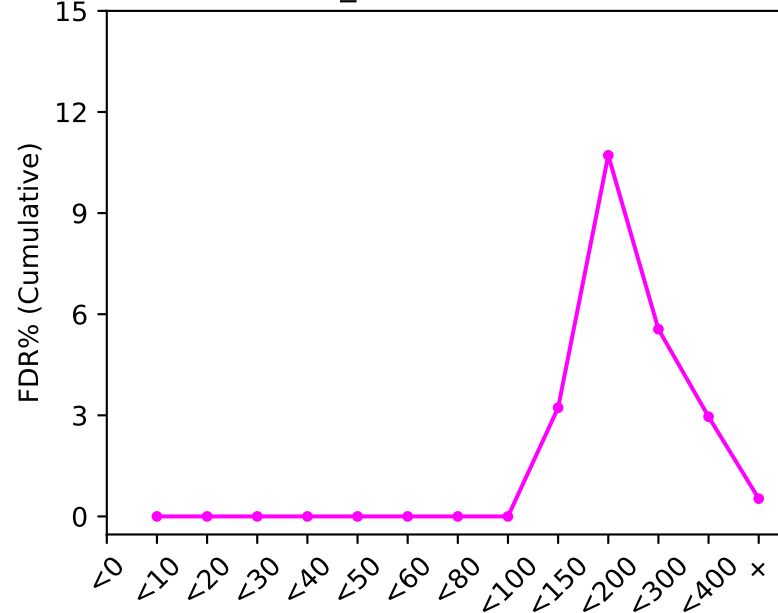

4.B.1 GT\_DP (Lab1 Patient Indel)

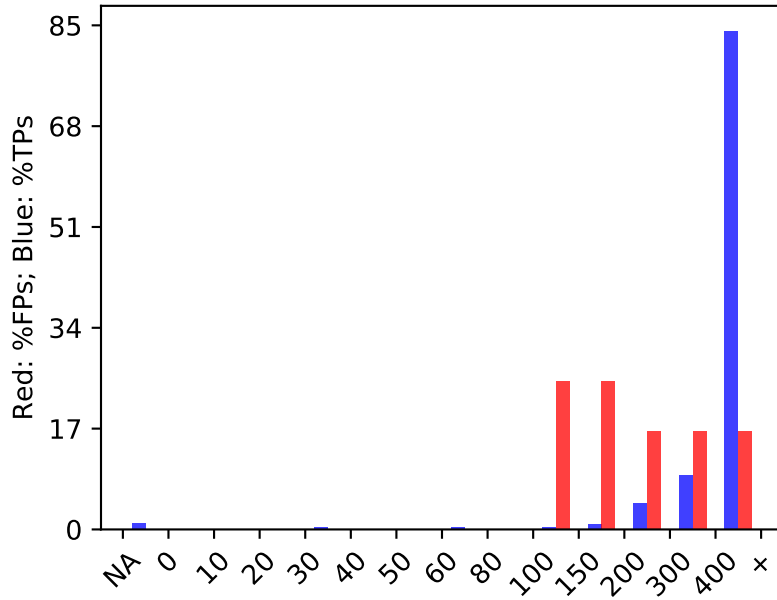

4.B.2 GT\_DP (Lab1 Patient Indel)

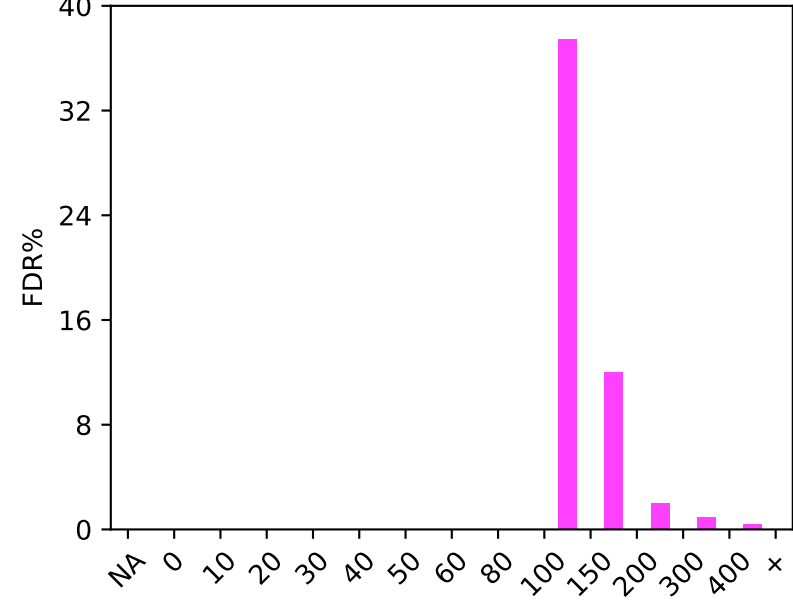

4.B.3 GT\_DP (Lab1 Patient Indel)

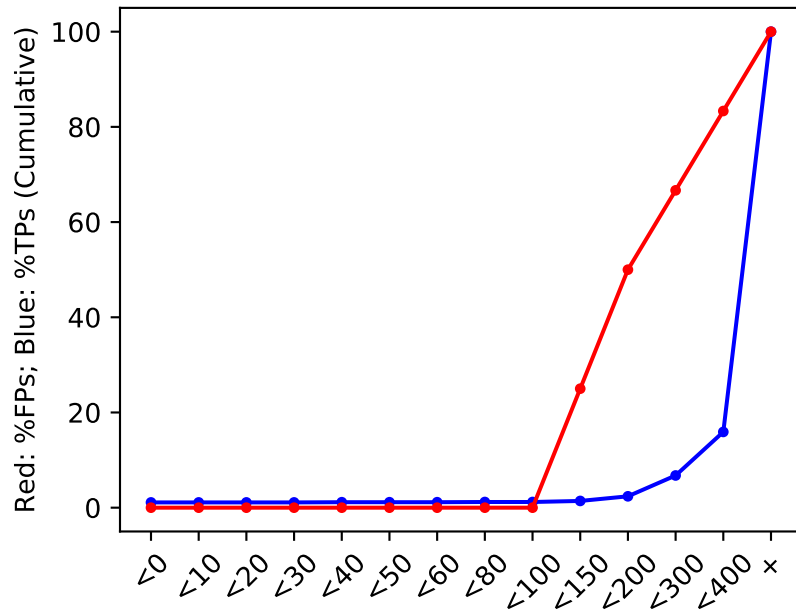

4.B.4 GT\_DP (Lab1 Patient Indel)

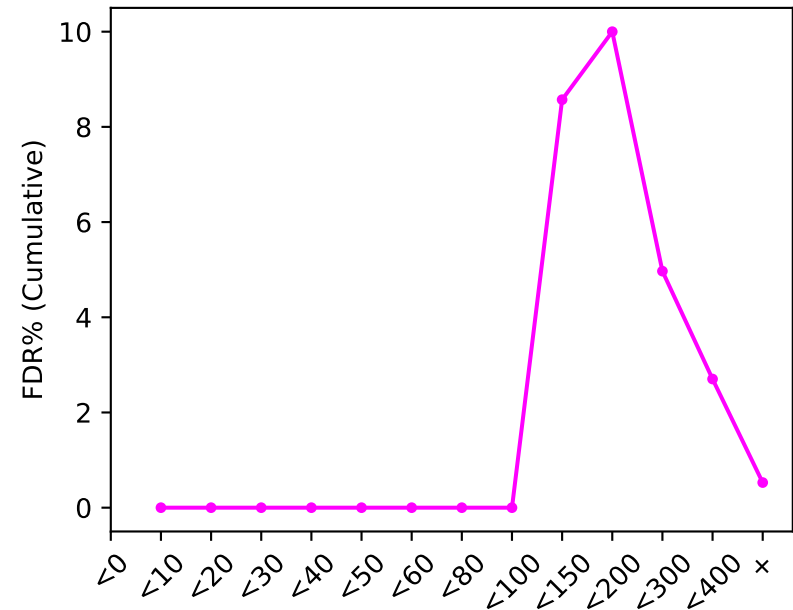

4.C.1 ABnorm (Lab1 Patient Indel)

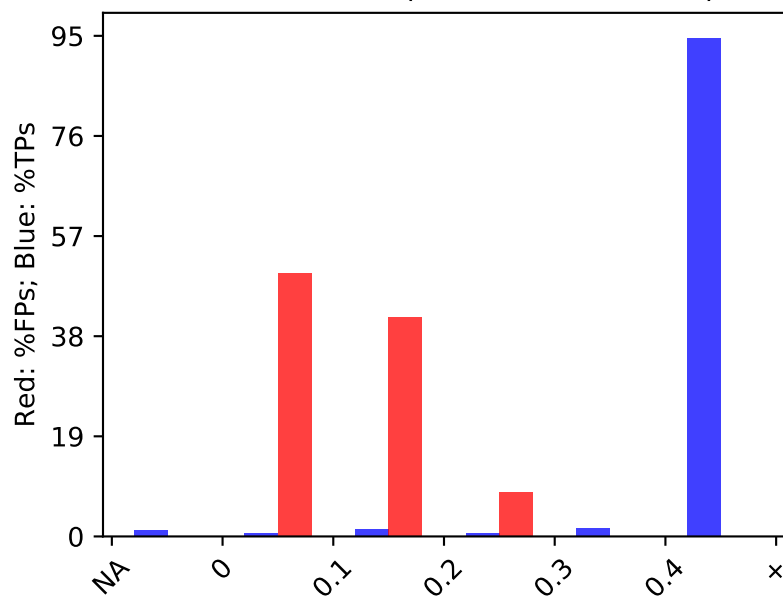

4.C.2 ABnorm (Lab1 Patient Indel)

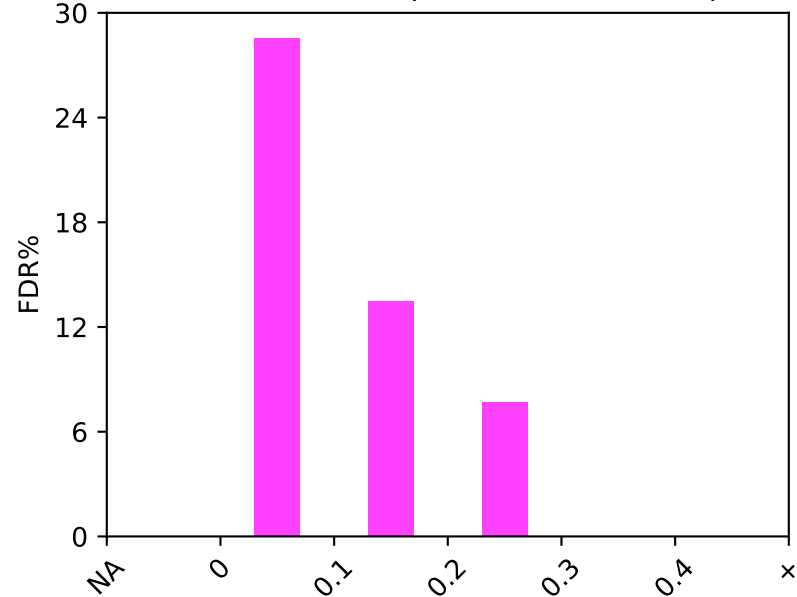

4.C.3 ABnorm (Lab1 Patient Indel)

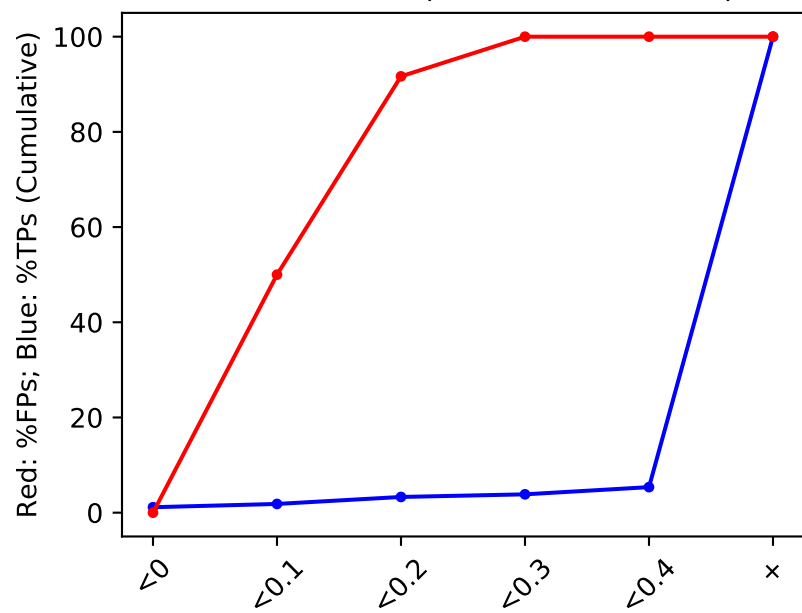

4.C.4 ABnorm (Lab1 Patient Indel)

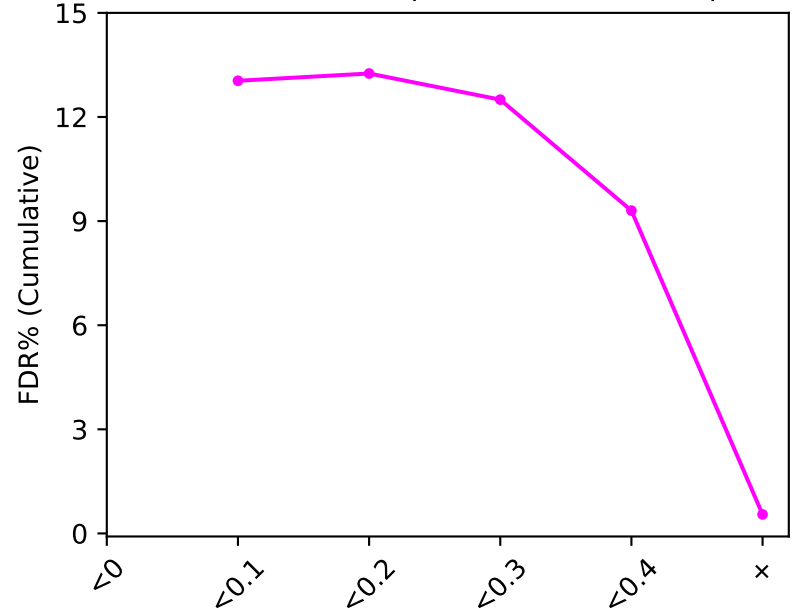

4.D.1 ABhom (Lab1 Patient Indel)

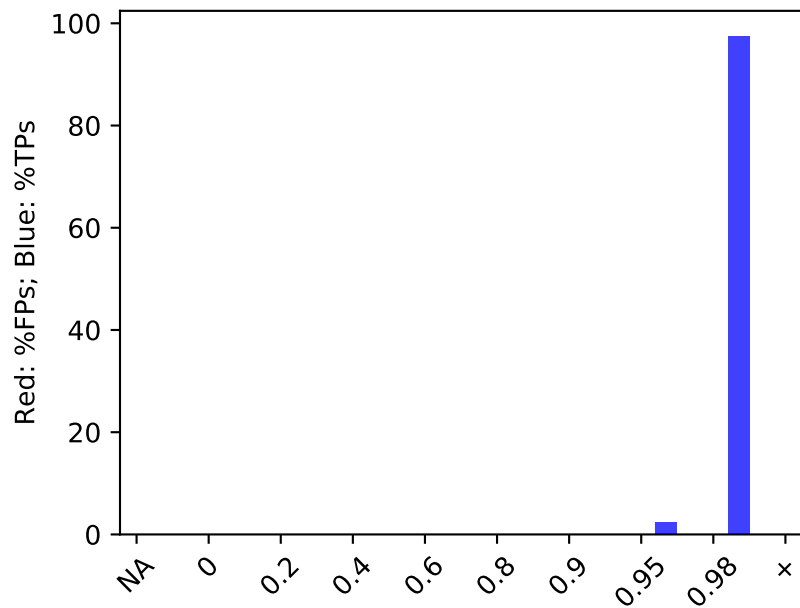

4.D.2 ABhom (Lab1 Patient Indel)

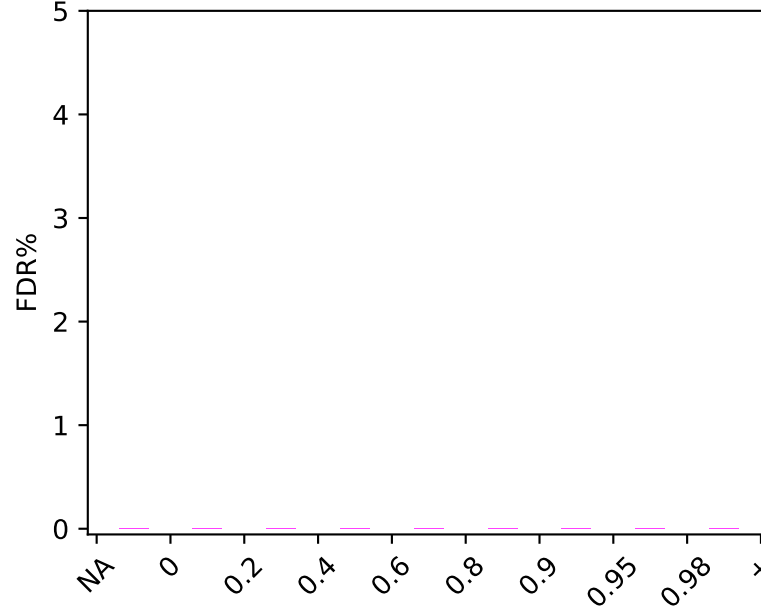

4.D.3 ABhom (Lab1 Patient Indel)

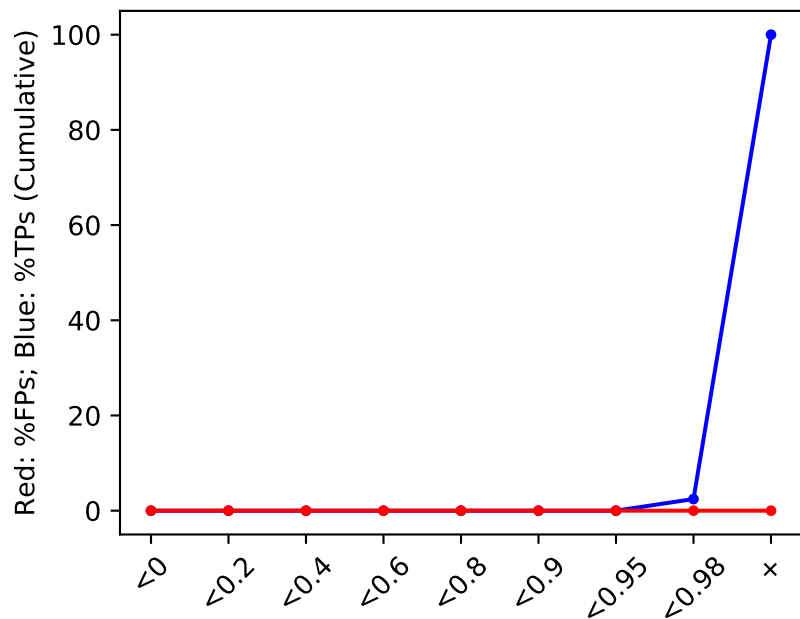

4.D.4 ABhom (Lab1 Patient Indel)

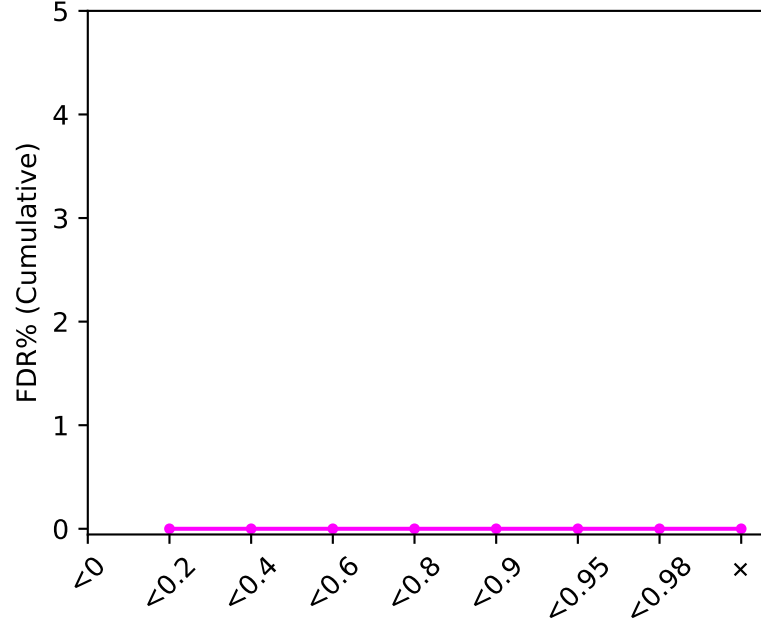

4.E.1 QUAL (Lab1 Patient Indel)

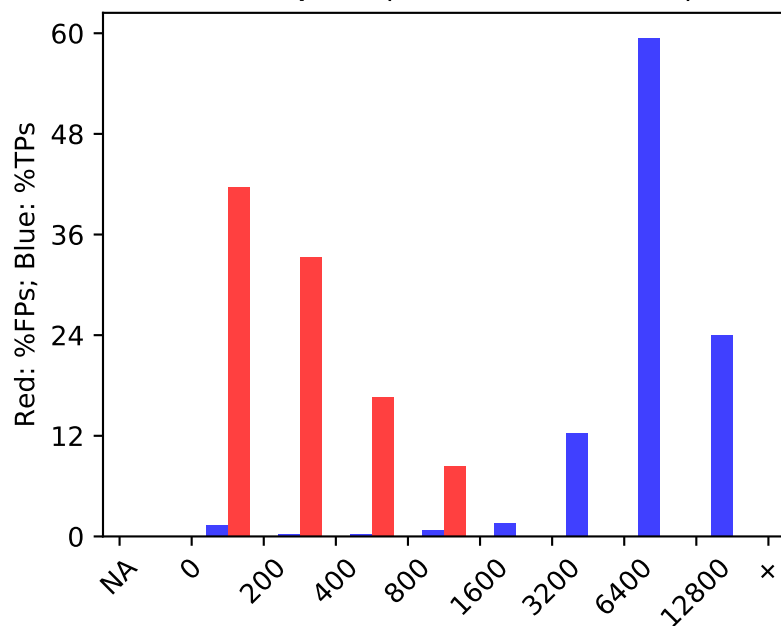

4.E.2 QUAL (Lab1 Patient Indel)

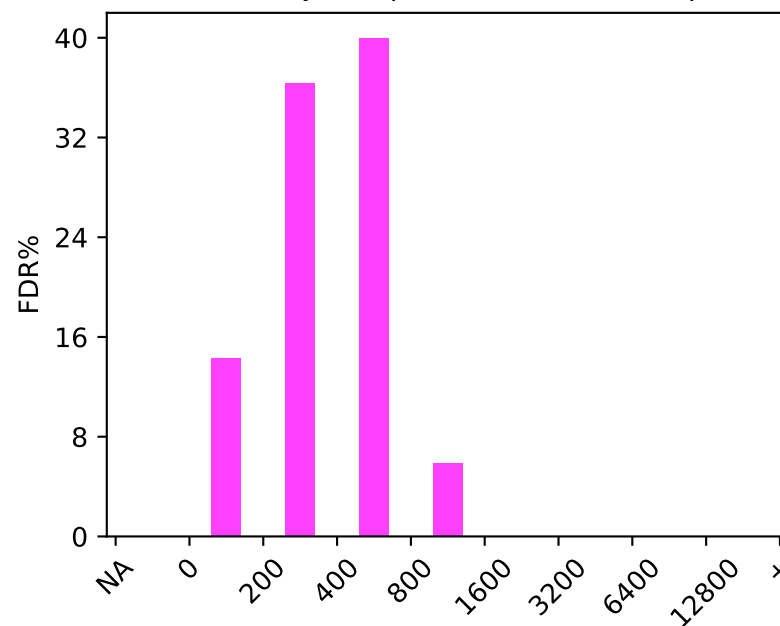

4.E.3 QUAL (Lab1 Patient Indel)

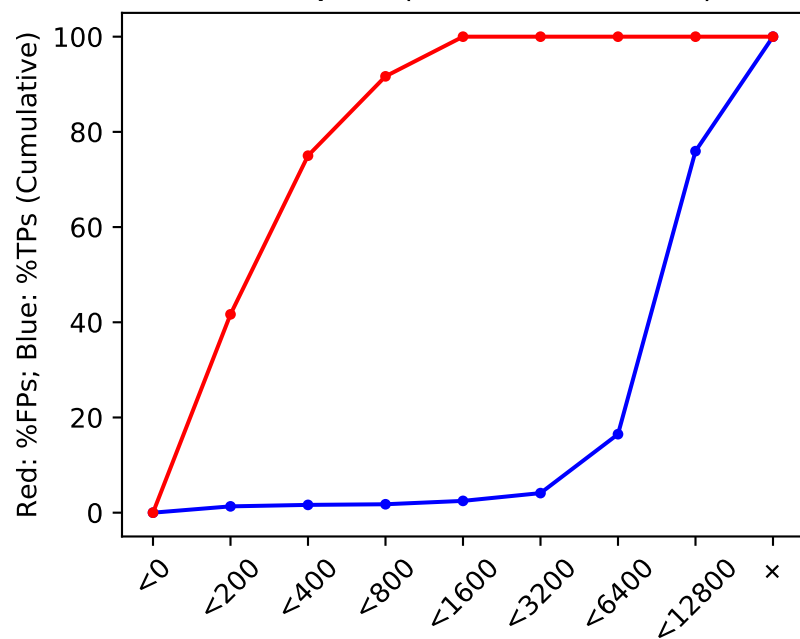

4.E.4 QUAL (Lab1 Patient Indel)

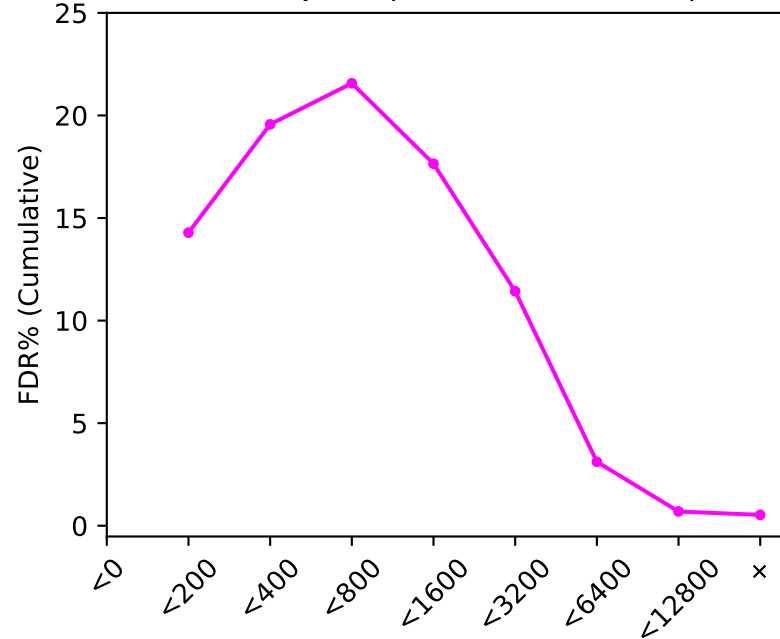

4.F.1 QD (Lab1 Patient Indel)

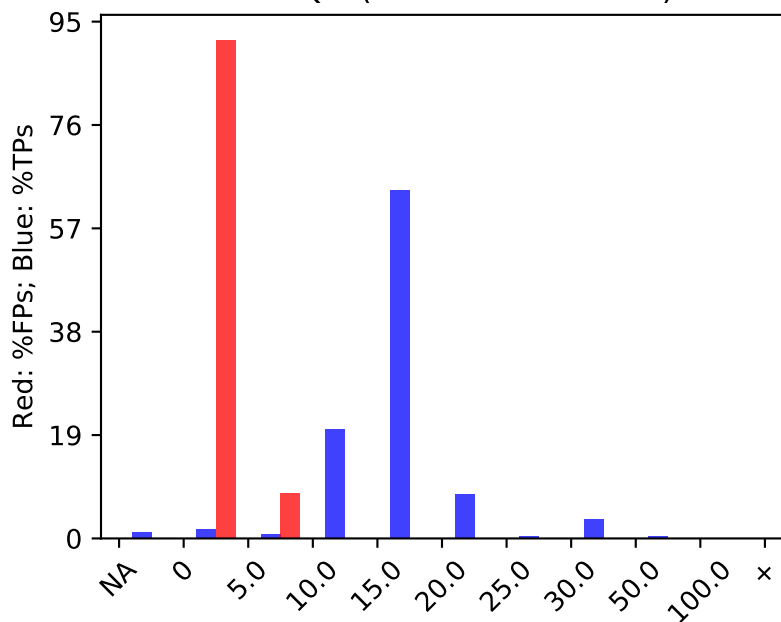

4.F.2 QD (Lab1 Patient Indel)

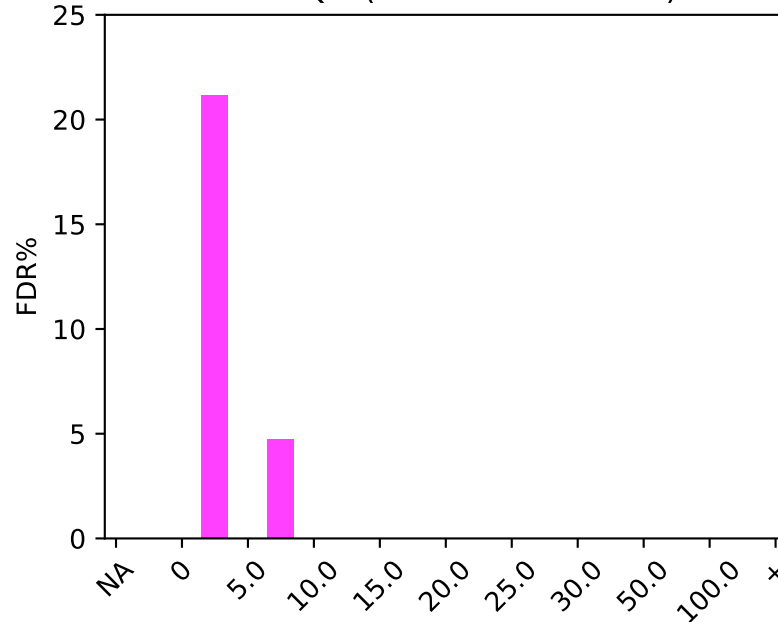

4.F.3 QD (Lab1 Patient Indel)

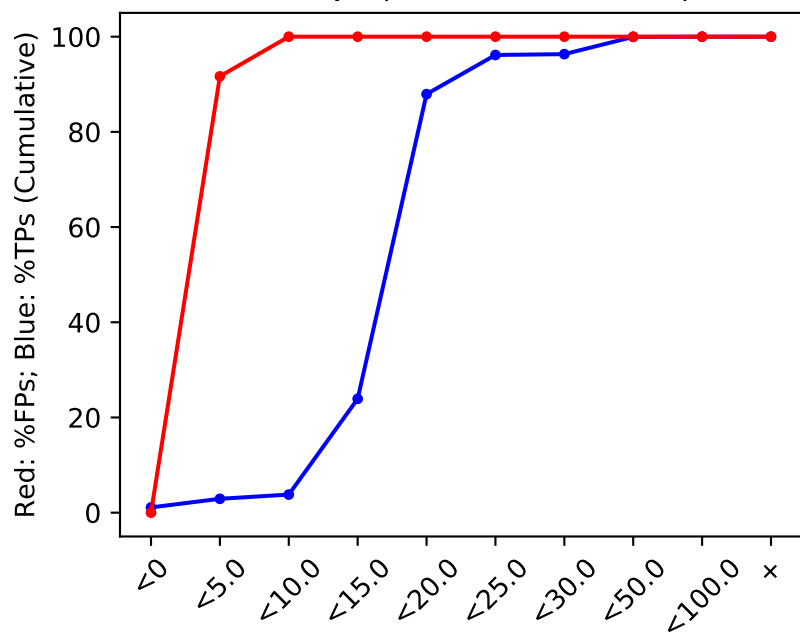

4.F.4 QD (Lab1 Patient Indel)

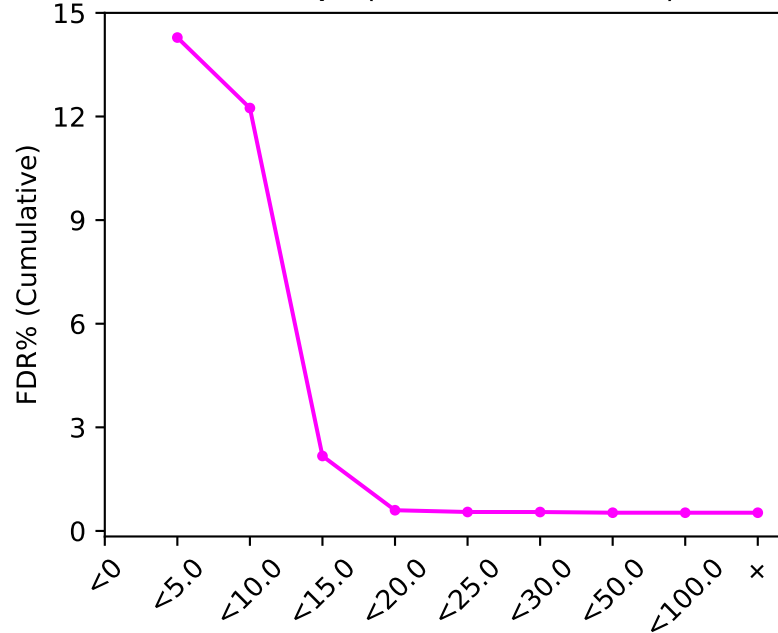

4.G.1 SB5 (Lab1 Patient Indel)

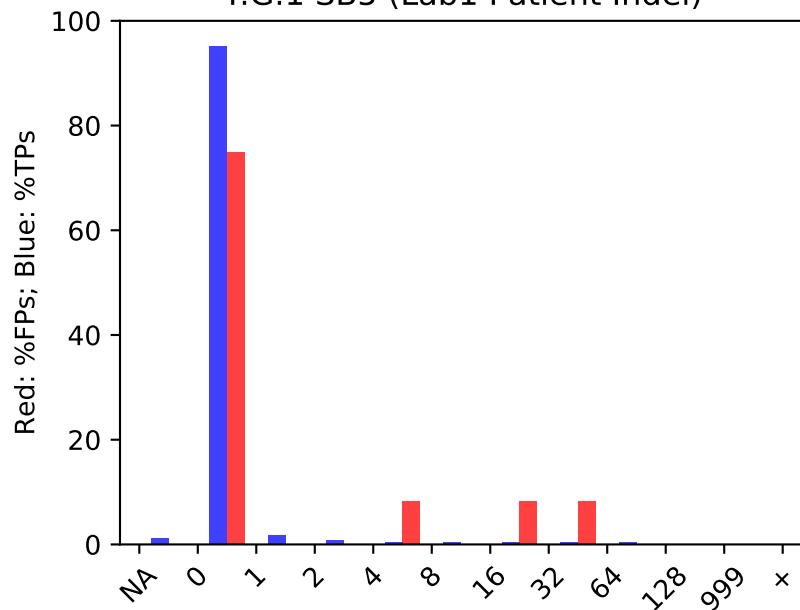

4.G.2 SB5 (Lab1 Patient Indel)

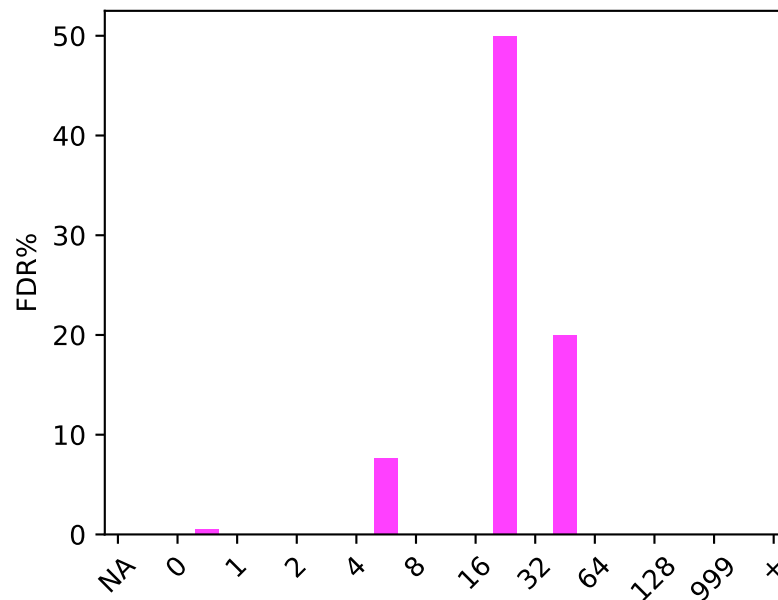

4.G.3 SB5 (Lab1 Patient Indel)

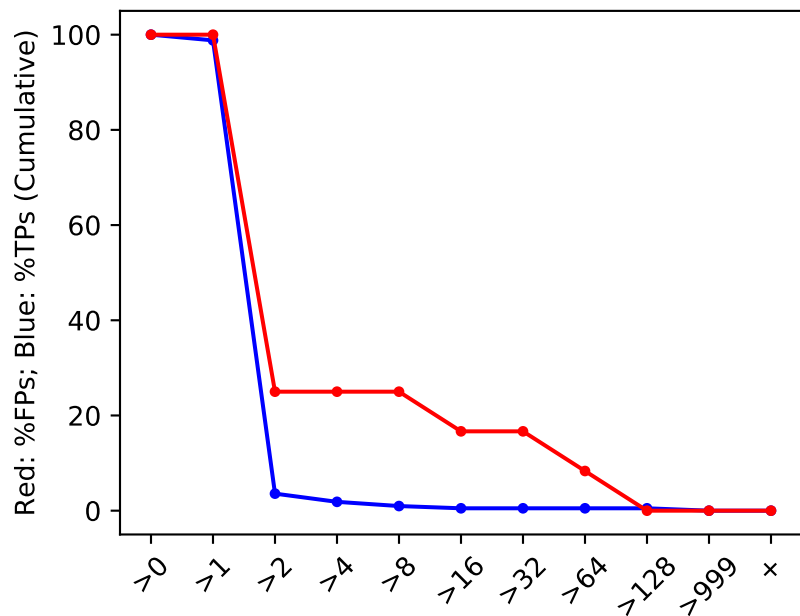

4.G.4 SB5 (Lab1 Patient Indel)

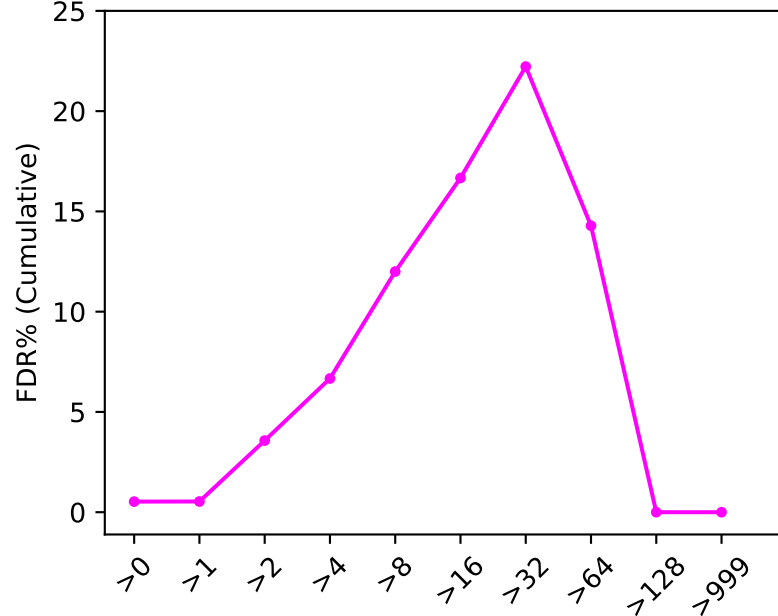



4.H.1 SB25 (Lab1 Patient Indel)

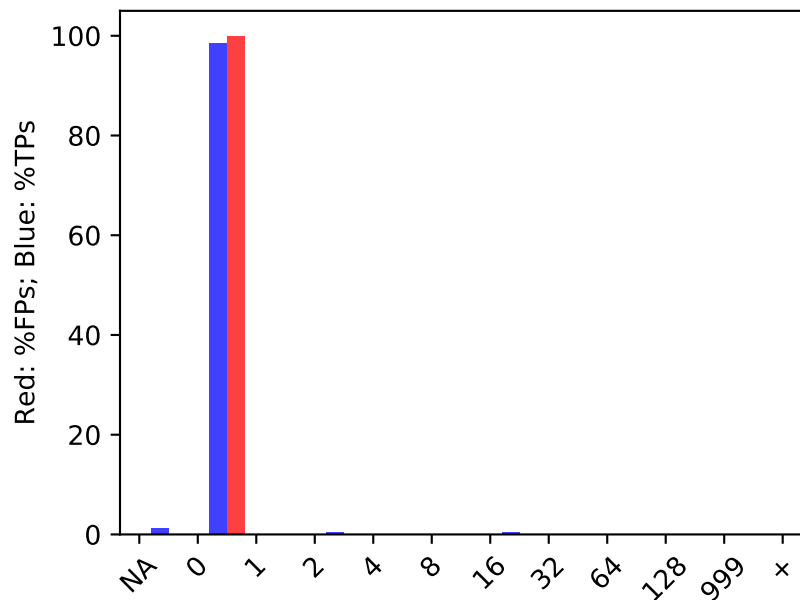

4.H.2 SB25 (Lab1 Patient Indel)

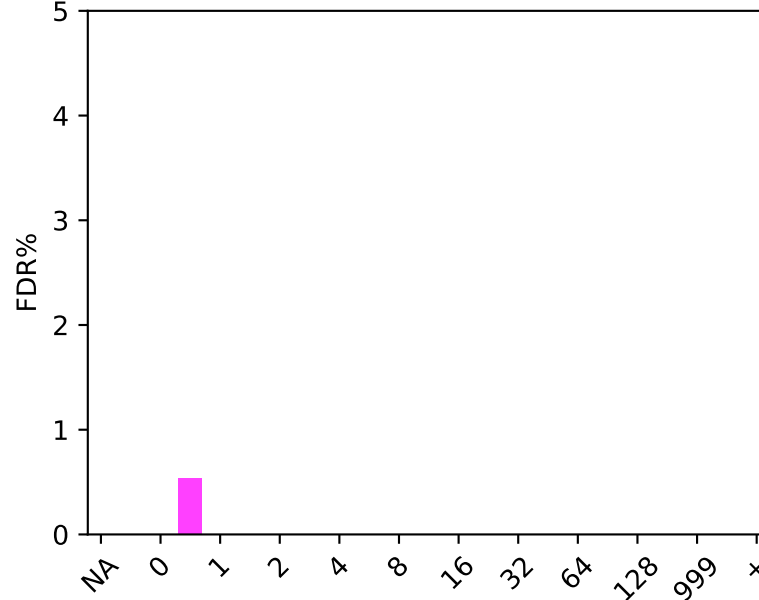

4.H.3 SB25 (Lab1 Patient Indel)

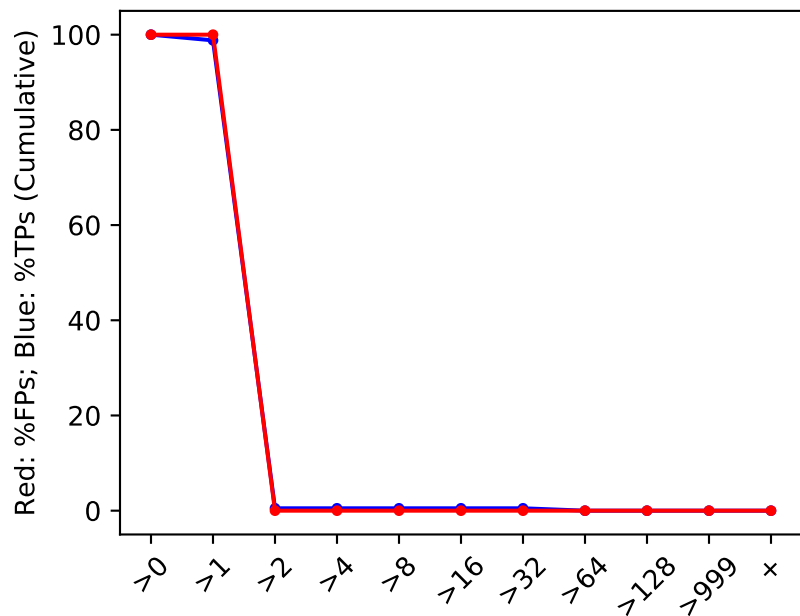

4.H.4 SB25 (Lab1 Patient Indel)

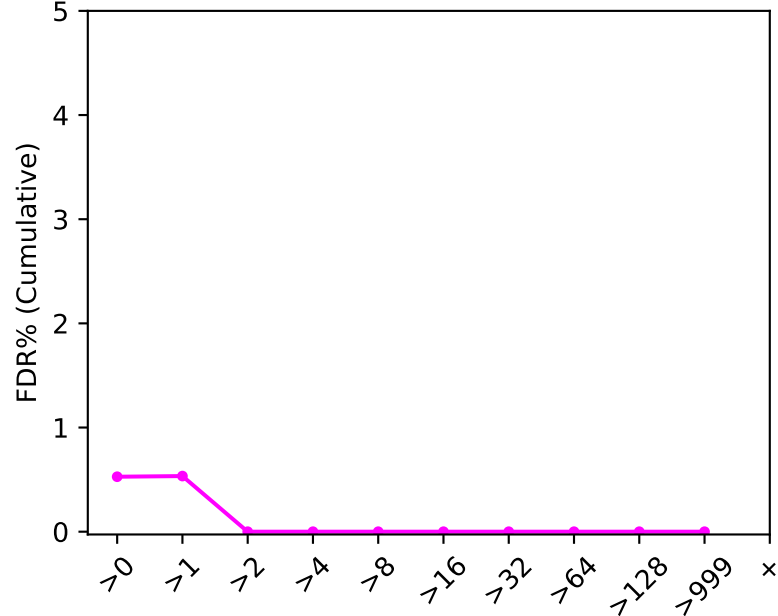

4.K.1 DP/DP ratio (Lab1 Patient Indel)

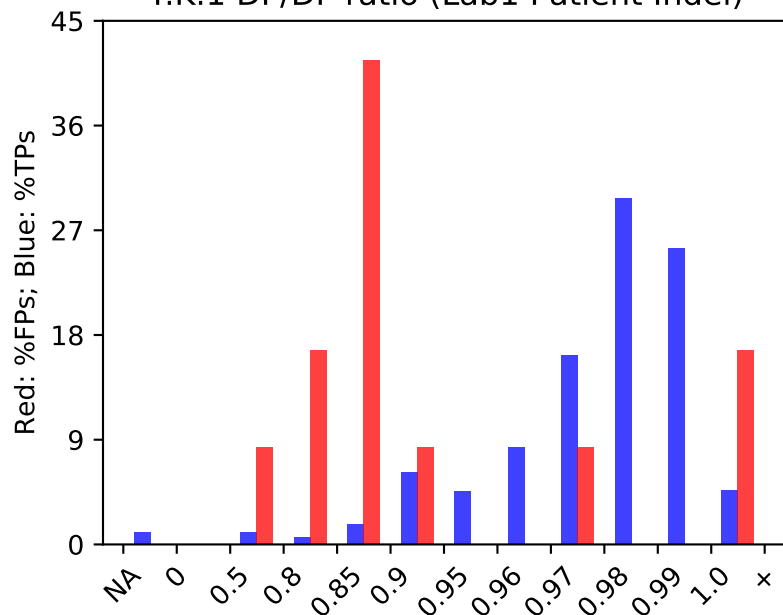

4.K.2 DP/DP ratio (Lab1 Patient Indel)

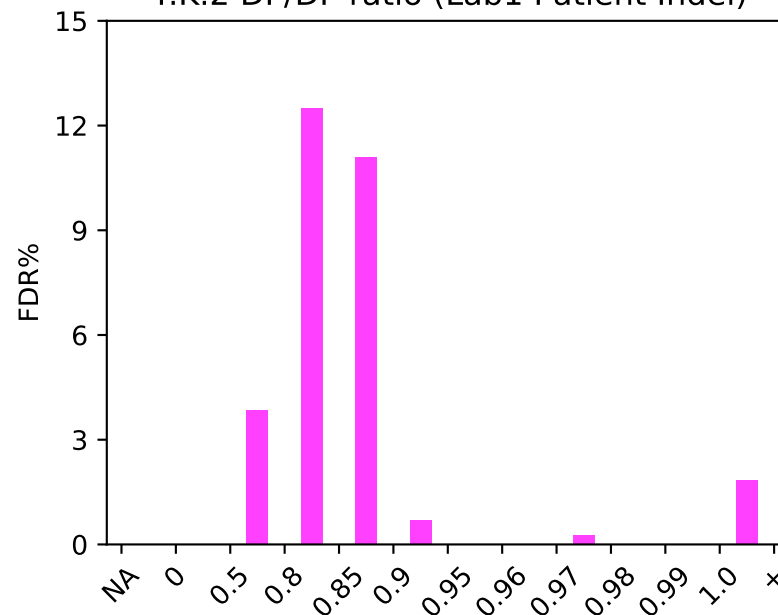

4.K.3 DP/DP ratio (Lab1 Patient Indel)

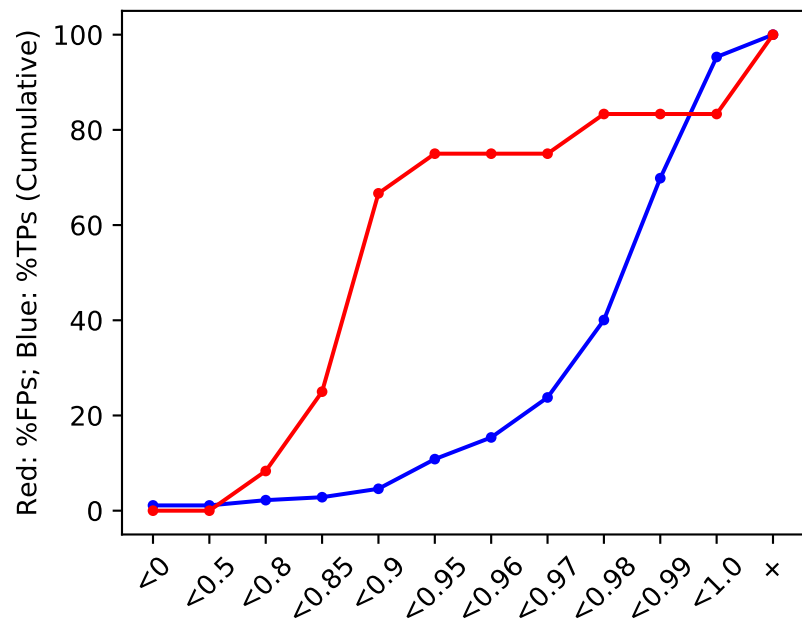

4.K.4 DP/DP ratio (Lab1 Patient Indel)

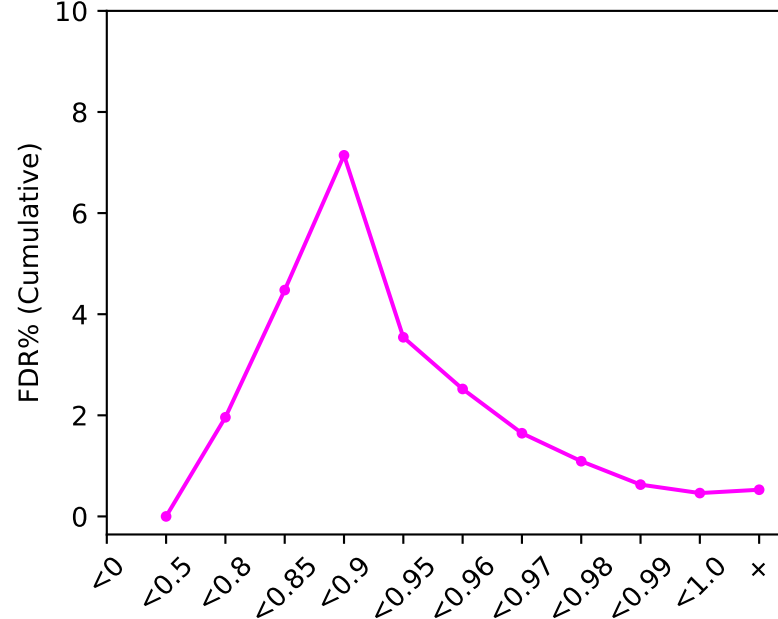

4.M.1 VAR-LEN (Lab1 Patient Indel)

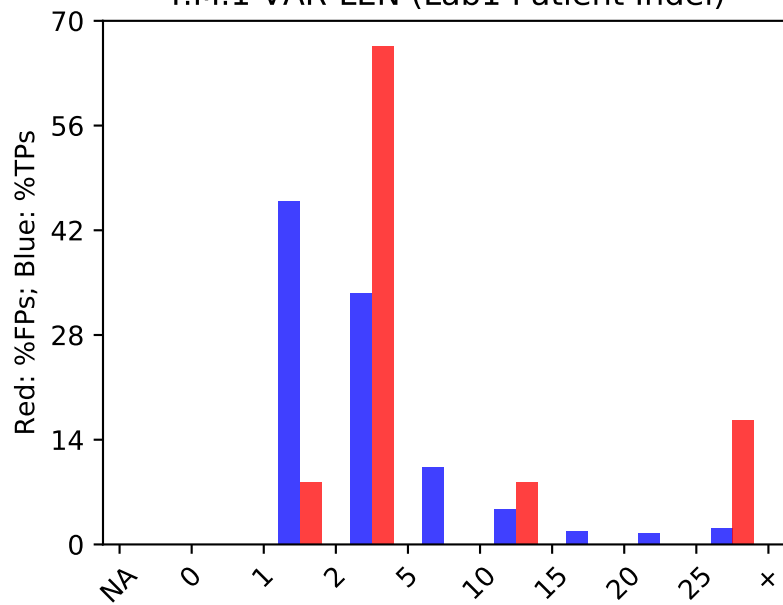

4.M.2 VAR-LEN (Lab1 Patient Indel)

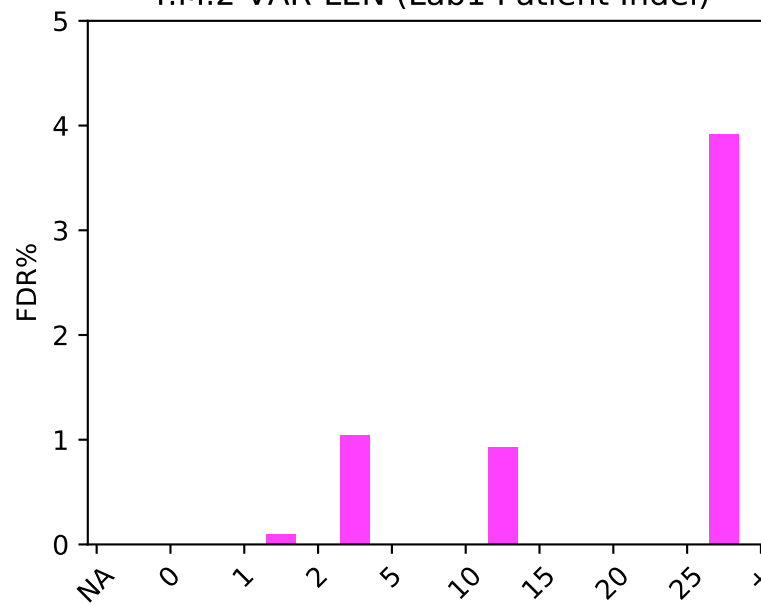

4.M.3 VAR-LEN (Lab1 Patient Indel)

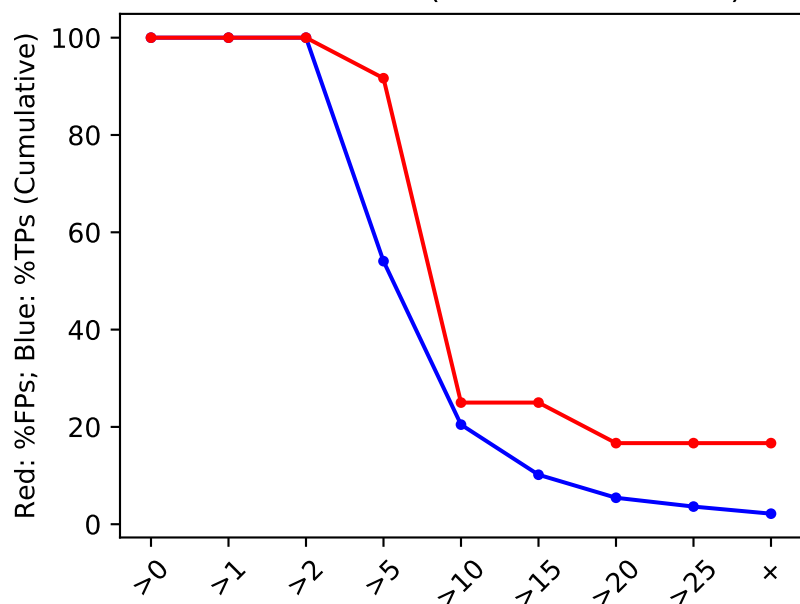

4.M.4 VAR-LEN (Lab1 Patient Indel)

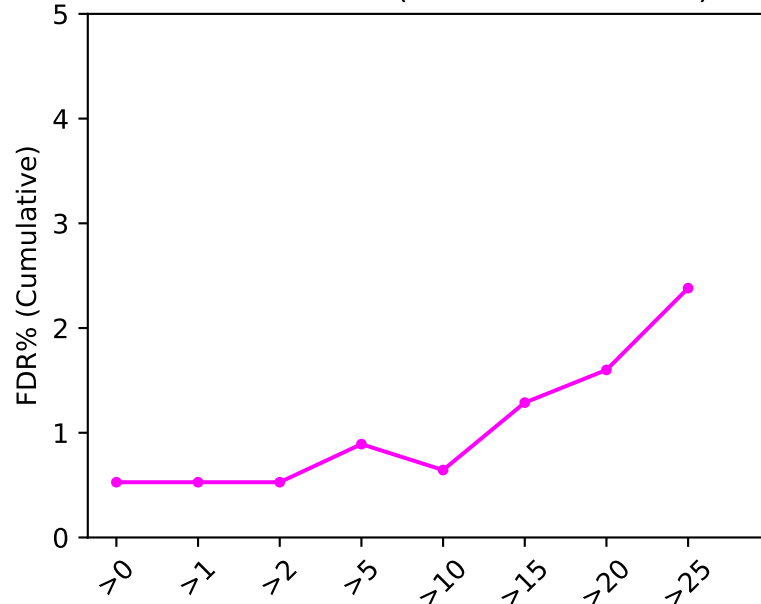

4.N.1 Binary warnings (Lab1 Patient Indel)

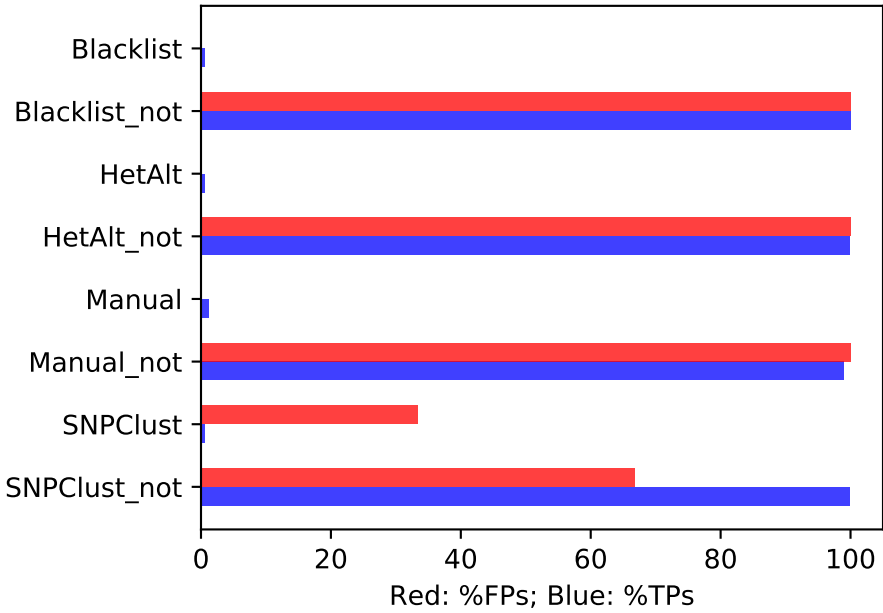

4.N.2 Binary warnings (Lab1 Patient Indel)

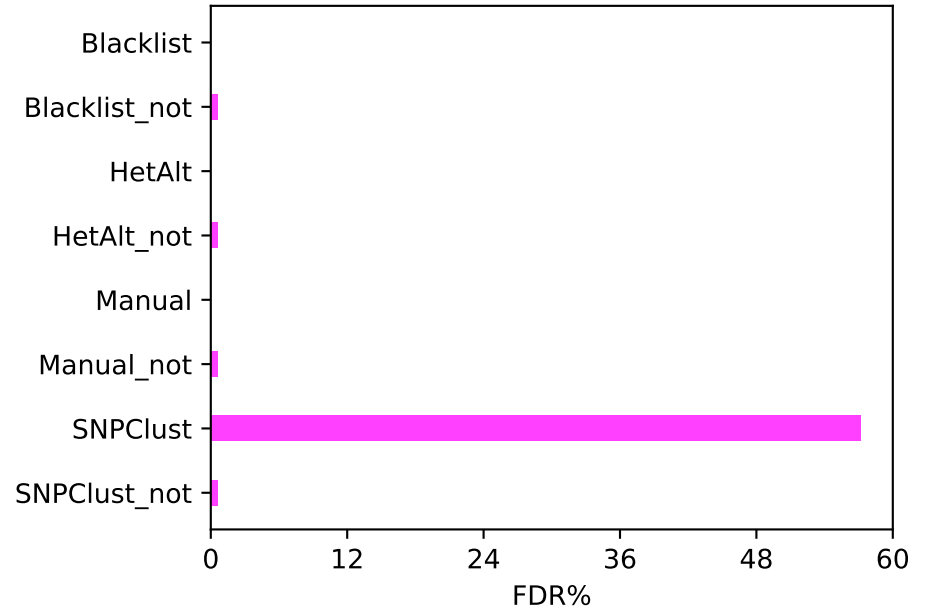

4.O.1 Genomic Context (Lab1 Patient Indel)

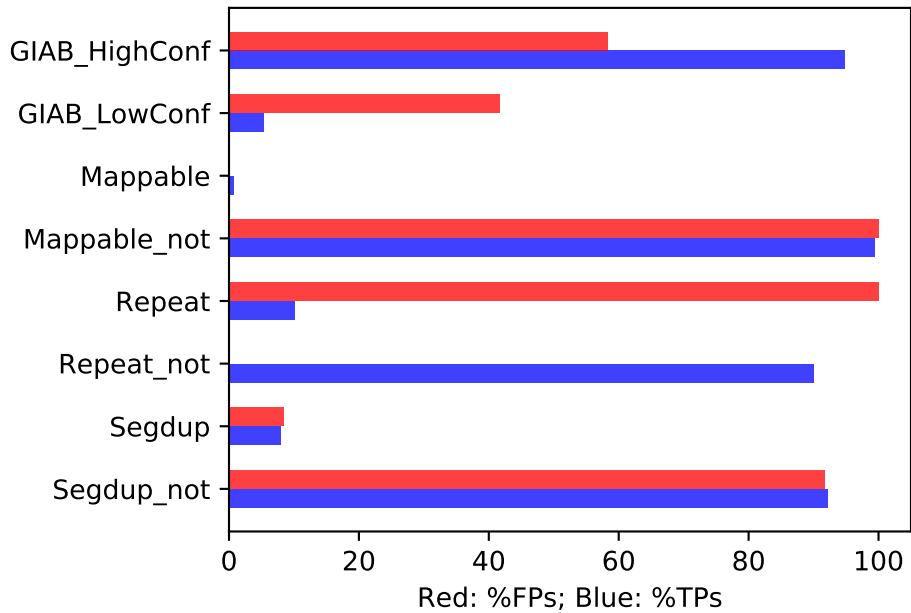

4.O.2 Genomic Context (Lab1 Patient Indel)

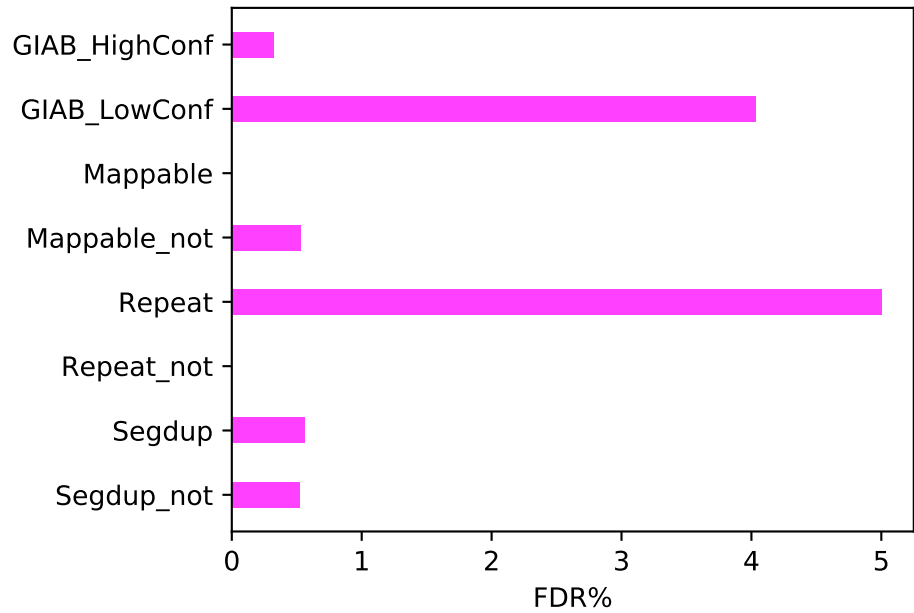

4.P Per-Variant FDR

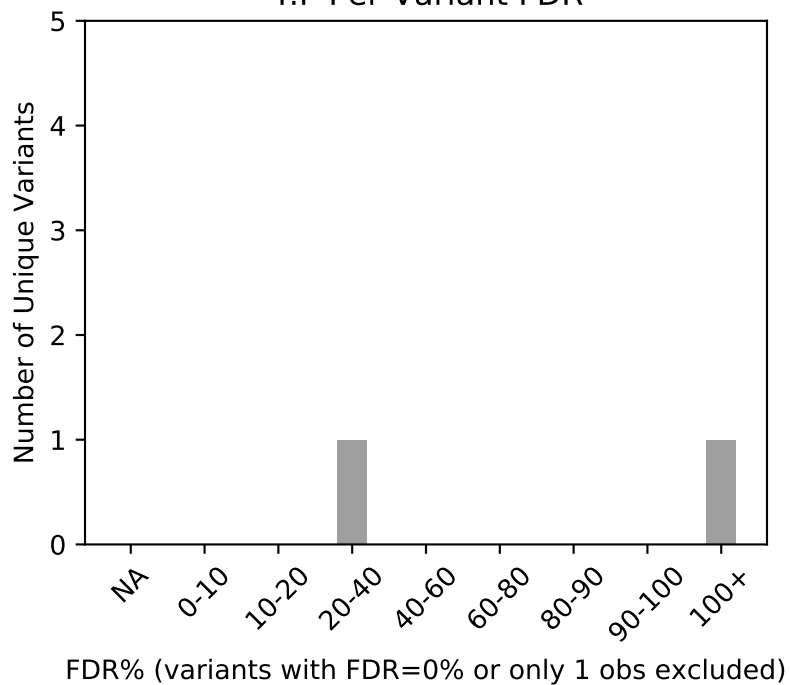

4.Q Published Criteria

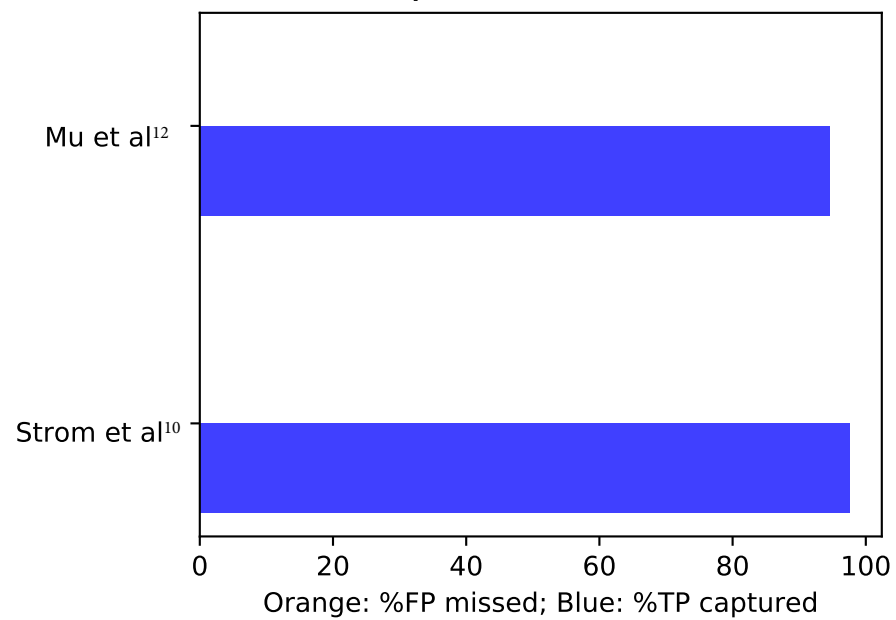

Supplement: mmc4.pdf [file mmc4.pdf]
