# Supplementary material
Source: PubMed Central journal article supplement (PMC6848948)

**A**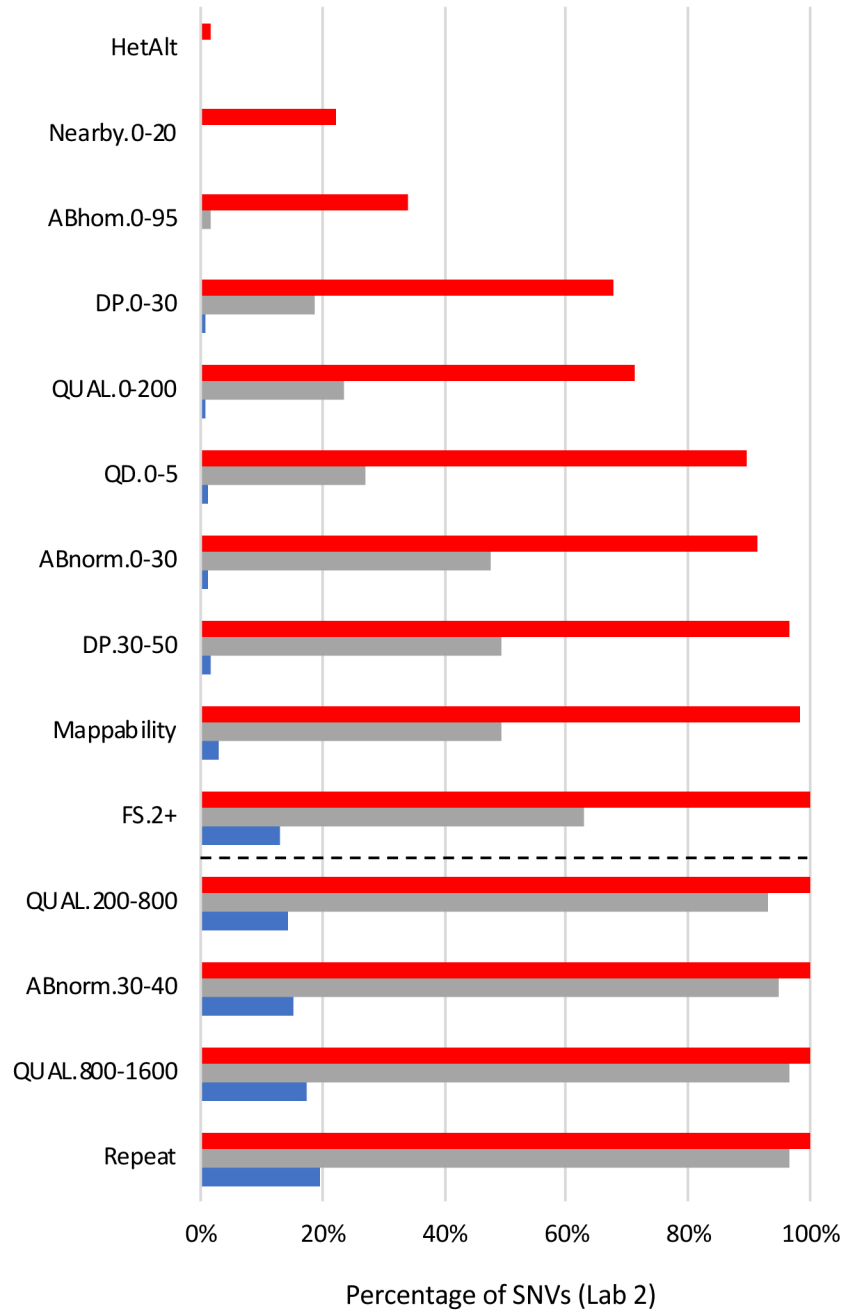**B**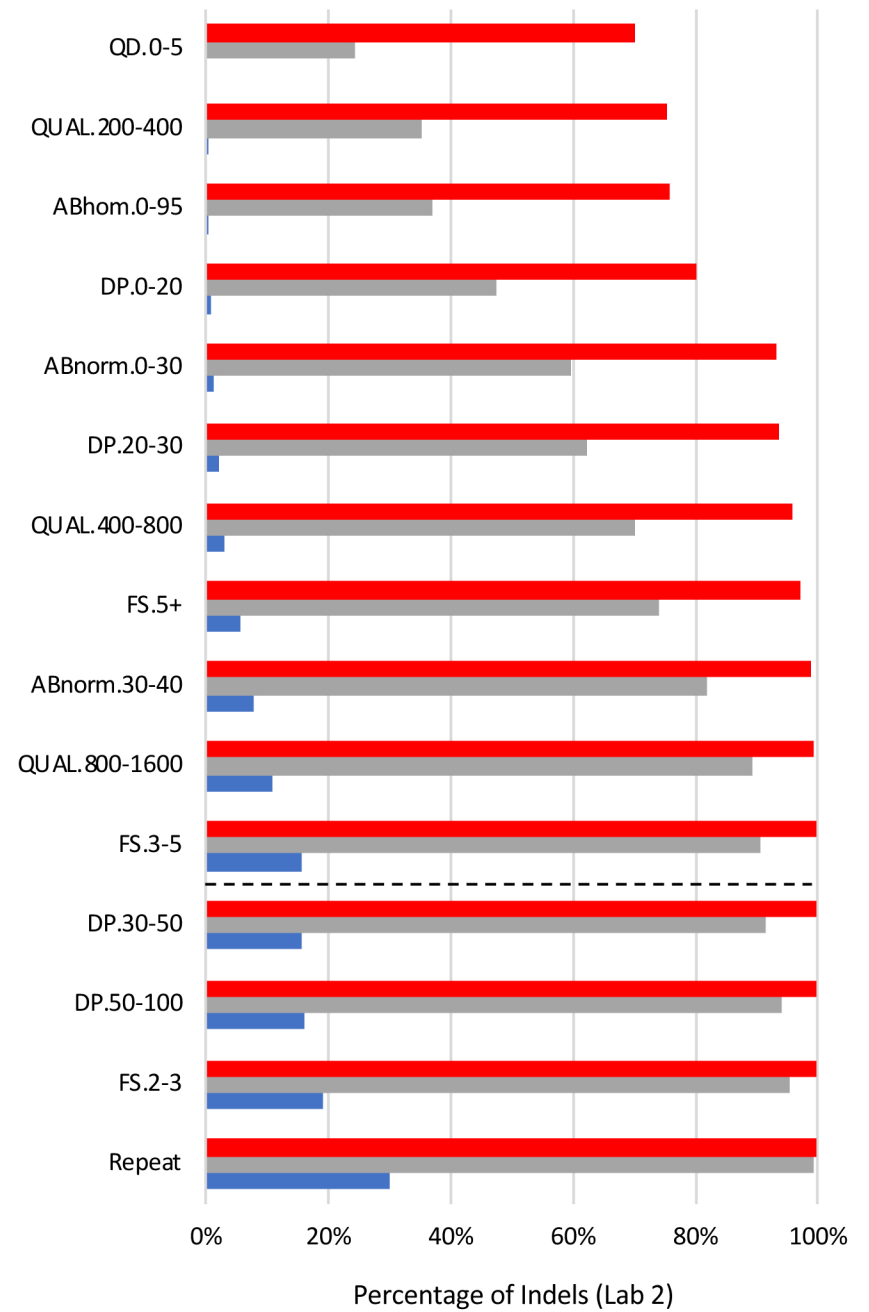

Supplement: mmc6.pdf [file mmc6.pdf]
